# Supplementary material for: Characterization of DNA Methylomic Signatures in Induced Pluripotent Stem Cells During Neuronal Differentiation
Source: Front Cell Dev Biol. 2021 Jul 1;9:647981. doi: 10.3389/fcell.2021.647981 (PMC8281298; doi:10.3389/fcell.2021.647981)
Supplement: Supplementary file 1 [file Table_1.XLSX]

## Sheet: Supplementary Table 1
	Supplementary Table 1: The 6,843 probes comprising the epigenetic trajectory signature identified through general additive modeling. Shown for each loci are its probe ID, uncorrected P-value, bonferroni corrected P-value, the methylation difference between the NPC and iPSC stage, methylation difference between the Neuron D37 and NPC stage, methylation difference between the Neuron D58 and Neuron …
	Probe ID	Uncorrected P-value	Bonferroni P-value	NPCs-iPSCs	D37 Neuron-NPCs	D58 Neuron-D37 Neuron	TI Module	Chromosome	Genomic Position	Illumina gene annotation (UCSC)	GREAT gene annotation
	cg00908292	1.04109e-13	4.35705e-09	-0.184247	-0.359888	-0.0266386	6	17	38699009		CCR7 (+22714)
	cg15190241	2.57466e-13	1.07752e-08	-0.270072	-0.387189	-0.0342561	6	1	168368506		TBX19 (+118229)
	cg21105928	4.65996e-13	1.95024e-08	-0.310316	-0.38072	-0.0171138	6	15	40143956	GPR176	GPR176 (+69136)
	cg14171824	6.06544e-13	2.53845e-08	-0.07658	-0.504845	-0.0944819	6	1	2006656	PRKCZ	PRKCZ (+24748)
	cg01933515	9.90527e-13	4.14545e-08	-0.161482	-0.454958	-0.0529756	6	14	96532698	C14orf132	C14orf132 (+27038)
	cg20109624	1.43e-12	5.98468e-08	-0.0475316	-0.122691	-0.176525	4	16	81254265	PKD1L2	BCMO1 (-17787)
	cg01170387	2.27708e-12	9.52979e-08	-0.0745691	-0.119341	-0.13043	4	16	31076818	ZNF668	ZNF668 (-443)
	cg24737914	2.43073e-12	1.01728e-07	-0.0721822	-0.390669	-0.180271	4	7	5739289	RNF216	RNF216 (+82080)
	cg25653165	3.04992e-12	1.27642e-07	-0.733729	0.0658089	0.0545177	7	5	179569548	RASGEF1C	RASGEF1C (-4200)
	cg00177101	3.17323e-12	1.32803e-07	-0.0915186	-0.31558	-0.116332	4	9	120545390		TLR4 (+78741)
	cg26181096	3.35222e-12	1.40294e-07	-0.33354	-0.122252	-0.0490057	6	22	41876619	ACO2	ACO2 (+11491)
	cg11702768	4.2416e-12	1.77515e-07	-0.170024	-0.251837	-0.174325	4	9	34567202	CNTFR-AS1	CNTFR (+22532)
	cg03724874	5.18091e-12	2.16826e-07	-0.292379	-0.188819	-0.0123436	6	3	111719291	TAGLN3	TAGLN3 (+1706)
	cg21762380	5.28618e-12	2.21232e-07	-0.167071	-0.177064	-0.0432718	6	9	93063697	LINC01508	DIRAS2 (+341688)
	cg13617441	5.49389e-12	2.29925e-07	-0.24199	-0.380927	-0.0337931	6	3	34886005		ARPP21 (-795872)
	cg04901527	6.35801e-12	2.66089e-07	-0.202372	-0.071404	-0.109712	4	10	117832870	GFRA1	GFRA1 (+200108)
	cg17957761	6.48748e-12	2.71507e-07	-0.406507	-0.161755	-0.0225613	6	19	46478879		NOVA2 (-2076)
	cg02331902	6.48873e-12	2.7156e-07	-0.350977	-0.258086	-0.0184503	6	5	90610303		ARRDC3 (+68872)
	cg02603875	6.76791e-12	2.83244e-07	-0.238915	-0.287364	-0.031322	6	5	152871549	GRIA1	GRIA1 (-182)
	cg24135615	7.32304e-12	3.06476e-07	-0.299024	-0.248285	-0.0275406	6	17	37042201	LASP1	LASP1 (+16090)
	cg04314308	8.79804e-12	3.68207e-07	0.132432	0.247333	0.100194	8	19	19336150	NCAN	NCAN (+13369)
	cg08811227	9.74236e-12	4.07727e-07	-0.21347	-0.323001	-0.0546226	6	16	24697469		TNRC6A (-43564)
	cg10859605	1.04542e-11	4.3752e-07	0.124074	0.343094	0.11829	8	8	30255368	RBPMS	RBPMS (+13342)
	cg13313697	1.13937e-11	4.76836e-07	-0.190504	-0.194276	-0.0132049	6	5	152870740	GRIA1	GRIA1 (-991)
	cg02103771	1.14094e-11	4.77495e-07	0.239797	0.1542	-0.026028	8	12	113531238	DTX1	DTX1 (+35744)
	cg00622618	1.22432e-11	5.12391e-07	-0.227662	-0.303553	-0.09004	6	6	38288376	BTBD9	BTBD9 (+319323)
	cg02268851	1.22922e-11	5.1444e-07	-0.13174	-0.40455	-0.0123493	6	11	47545207	CELF1	CELF1 (+332)
	cg20780998	1.41501e-11	5.92196e-07	-0.12313	-0.214535	-0.0100237	6	X	12996931		TMSB4X (+3703)
	cg17835180	1.53172e-11	6.4104e-07	-0.122381	-0.457506	-0.0228844	6	X	12995592		TMSB4X (+2364)
	cg15167636	1.55301e-11	6.49952e-07	-0.27591	-0.12487	-0.137696	4	12	90485193		ATP2B1 (-382586)
	cg02494279	1.64972e-11	6.90425e-07	-0.236323	-0.42511	-0.0462946	6	18	23395233		SS18 (+275355)
	cg12379611	1.65394e-11	6.92189e-07	-0.018335	-0.256369	-0.280334	4	10	17045387	CUBN	CUBN (+126442)
	cg01956293	1.70533e-11	7.13699e-07	-0.215032	-0.257106	-0.0867703	6	2	145212605	ZEB2	ZEB2 (+66015)
	cg08332866	1.98251e-11	8.29699e-07	-0.162405	-0.561537	-0.013242	6	17	35017916		MRM1 (+59916)
	cg03534428	1.99833e-11	8.36323e-07	-0.115918	-0.16711	-0.0755624	6	19	42972740	LIPE-AS1	CXCL17 (-25541)
	cg01079726	2.22742e-11	9.32196e-07	-0.209295	-0.285588	-0.00078625	6	14	100485682		EVL (-45932)
	cg08960385	2.34706e-11	9.82269e-07	-0.162318	-0.261853	-0.0349369	6	20	43367613		KCNK15 (-6807)
	cg07584840	2.4954e-11	1.04435e-06	-0.0497049	-0.305395	-0.103261	4	12	94579928	PLXNC1	PLXNC1 (+37430)
	cg06538238	2.50155e-11	1.04692e-06	-0.119681	-0.474982	-0.0796041	6	6	29588575	GABBR1	GABBR1 (+12386)
	cg16627786	2.56609e-11	1.07394e-06	0.0637991	0.411699	0.0469887	8	22	19711051	GP1BB	GP1BB (+584)
	cg27587033	2.63011e-11	1.10073e-06	-0.0671559	-0.266827	-0.0869517	6	1	2006032	PRKCZ	PRKCZ (+24124)
	cg19902443	2.73403e-11	1.14422e-06	-0.0152834	-0.173503	-0.148368	4	20	11899807	BTBD3	BTBD3 (+28332)
	cg19827346	2.77525e-11	1.16147e-06	-0.258035	-0.305414	-0.0158309	6	6	152702387	SYNE1	SYNE1 (+256146)
	cg13053505	2.80298e-11	1.17307e-06	0.0773731	0.147735	0.0736164	8	4	4854459		MSX1 (-6933)
	cg22395355	3.33382e-11	1.39524e-06	0.356152	0.241242	0.0604764	8	17	17713061	RAI1	SREBF1 (+27239)
	cg22334705	3.65246e-11	1.52859e-06	-0.241515	-0.332229	-0.0336203	6	14	60174988	RTN1	RTN1 (+162695)
	cg15523863	3.7134e-11	1.5541e-06	-0.200473	-0.350761	-0.0494887	6	20	36103803		NNAT (-45813)
	cg02879029	3.80209e-11	1.59121e-06	-0.286406	-0.315072	-0.062816	6	8	10829962	XKR6	PINX1 (-132577)
	cg19981475	3.87247e-11	1.62067e-06	-0.0595882	-0.25724	-0.0943644	4	12	81544296	ACSS3	ACSS3 (+73307)
	cg11638071	3.87285e-11	1.62083e-06	-0.353307	-0.220728	-0.0484858	6	17	56405967	BZRAP1	BZRAP1 (-523)
	cg04122918	3.94478e-11	1.65093e-06	-0.0780672	-0.368184	-0.151507	4	14	73146313	DPF3	DPF3 (+214495)
	cg16306978	4.50788e-11	1.88659e-06	0.236476	0.247378	-0.0202465	8	2	21266953	APOB	APOB (-9)
	cg01005772	4.62943e-11	1.93746e-06	-0.395136	-0.158169	-0.027114	6	X	21746118	SMPX	SMPX (+30162)
	cg26584734	4.6869e-11	1.96151e-06	-0.190757	-0.172748	-0.0371916	6	12	2322914	CACNA1C	CACNA1C (+160186)
	cg19468061	4.91209e-11	2.05576e-06	-0.233603	-0.343076	-0.068819	6	15	76016265	ODF3L1	CSPG4 (-11077)
	cg12858701	5.37507e-11	2.24952e-06	-0.137633	0.362871	0.114469	9	10	114894792	TCF7L2	TCF7L2 (+184784)
	cg07759833	5.52767e-11	2.31339e-06	-0.387219	-0.244465	-0.000884222	6	13	44619208		SMIM2 (+116184)
	cg09972881	5.57751e-11	2.33424e-06	0.345967	0.201452	-0.0301202	8	12	53298822	KRT8	KRT8 (+21430)
	cg21291759	5.90419e-11	2.47096e-06	-0.0901136	-0.111336	-0.131531	4	1	18406786		IGSF21 (-27453)
	cg18282152	6.30321e-11	2.63796e-06	-0.356624	-0.199767	-0.0517725	6	19	47250546	STRN4	STRN4 (-409)
	cg26225814	6.38815e-11	2.6735e-06	-0.224613	-0.306109	-0.0123991	4	14	100485695		EVL (-45919)
	cg18630264	6.5185e-11	2.72806e-06	-0.064064	-0.192788	-0.24835	4	4	140707850	MAML3	MGST2 (+120929)
	cg04217672	6.60083e-11	2.76252e-06	-0.286839	-0.293001	-0.0865018	6	6	138145607	LOC100130476	TNFAIP3 (-42973)
	cg04817410	6.60313e-11	2.76348e-06	-0.415802	-0.234746	0.00503979	6	7	129992661	CPA5	CPA5 (+7975)
	cg17531849	6.68505e-11	2.79776e-06	-0.0107221	-0.196925	-0.267672	4	17	77311766	HRNBP3	RBFOX3 (+166796)
	cg06229024	6.79311e-11	2.84298e-06	-0.00426188	-0.109589	-0.149741	1	17	37234463	LOC100131347	PLXDC1 (+73438)
	cg22041712	6.81816e-11	2.85347e-06	-0.0416181	-0.409967	-0.105583	4	1	214834360	CENPF	CENPF (+57823)
	cg15798153	6.97449e-11	2.91889e-06	-0.20341	-0.251687	-0.0559376	4	7	90338861	CDK14	CDK14 (+150)
	cg24692861	7.06976e-11	2.95877e-06	-0.196925	-0.255972	-0.0564992	6	3	155524344	C3orf33	C3orf33 (-290)
	cg20071868	7.99336e-11	3.3453e-06	0.021597	0.212179	0.0881112	8	19	46917023	CCDC8	CCDC8 (-183)
	cg19374523	8.13669e-11	3.40528e-06	-0.057204	-0.187845	-0.043852	6	15	77897134		LINGO1 (+27697)
	cg02470385	8.14343e-11	3.40811e-06	-0.236008	-0.371191	0.0409427	5	9	75764559		ANXA1 (-8010)
	cg07369461	8.21175e-11	3.4367e-06	0.0464613	-0.23272	-0.326359	1	20	57760364		ZNF831 (-5710)
	cg20594765	8.51523e-11	3.56371e-06	0.0231316	-0.361979	-0.168858	1	1	230276238	GALNT2	GALNT2 (+73283)
	cg03146143	8.6788e-11	3.63217e-06	0.211335	0.15249	-0.0477817	8	4	183514720	TENM3	DCTD (+323811)
	cg23913713	9.20967e-11	3.85434e-06	-0.197294	-0.0860897	-0.126204	4	10	7486755		SFMBT2 (-35453)
	cg08216304	9.21334e-11	3.85587e-06	-0.40184	-0.261518	-0.0481142	6	8	26483122	DPYSL2	DPYSL2 (+47764)
	cg13227833	9.29182e-11	3.88872e-06	-0.274551	-0.225875	-0.0717035	4	17	76899772	CEP295NL	ENSG00000178404 (-490)
	cg18652871	9.41424e-11	3.93995e-06	-0.0430614	-0.316691	-0.111122	4	15	70551557		TLE3 (-161043)
	cg00622552	9.58173e-11	4.01005e-06	-0.153323	-0.312364	-0.0692485	6	15	76016335	ODF3L1	CSPG4 (-11147)
	cg19138961	9.58927e-11	4.01321e-06	-0.0581158	-0.296775	-0.216502	4	16	64515534		CDH11 (+640566)
	cg04439622	9.71452e-11	4.06562e-06	0.209167	0.287657	0.0503195	8	14	105944942	CRIP2	CRIP2 (+5644)
	cg02064516	9.86265e-11	4.12762e-06	-0.184221	-0.183006	-0.00402225	6	5	148737097	PCYOX1L	PCYOX1L (-472)
	cg11289747	1.00182e-10	4.19271e-06	-0.171644	-0.437843	-0.0481175	6	1	42328785	HIVEP3	HIVEP3 (+55383)
	cg03295251	1.00751e-10	4.21654e-06	-0.0671809	-0.319891	-0.194314	4	16	78601911	WWOX	WWOX (+468602)
	cg03358657	1.02181e-10	4.2764e-06	-0.105144	-0.319	-0.197733	4	2	168719447	LOC105616981	B3GALT1 (-6010)
	cg13653391	1.0474e-10	4.38346e-06	-0.143378	-0.268188	-0.0623101	6	10	134896691		GPR123 (-4717)
	cg10129944	1.06216e-10	4.44523e-06	-0.0480056	-0.352807	-0.0707535	6	6	12718408	PHACTR1	PHACTR1 (-133)
	cg18309967	1.07776e-10	4.51055e-06	0.251595	0.234609	0.0259116	8	11	119884116		TRIM29 (+125044)
	cg24883265	1.08548e-10	4.54284e-06	-0.0429325	-0.227676	-0.194049	4	1	5917845		NPHP4 (+134685)
	cg09907628	1.09349e-10	4.57637e-06	-0.0158356	-0.285809	-0.0417961	3	16	89498634	ANKRD11	ANKRD11 (+58334)
	cg18689942	1.21538e-10	5.08648e-06	-0.165848	-0.340386	-0.0249877	6	1	158071946		CD1D (-77790)
	cg12533863	1.22005e-10	5.10602e-06	-0.320878	-0.133542	-0.0693725	6	2	105320213		POU3F3 (-151755)
	cg03475776	1.25025e-10	5.23244e-06	-0.0482671	-0.243041	-0.175046	4	2	240114298	HDAC4	HDAC4 (+208344)
	cg05185926	1.26696e-10	5.30237e-06	-0.101975	-0.521439	-0.0858254	4	5	142602110	ARHGAP26	NR3C1 (+181143)
	cg07282550	1.26817e-10	5.30742e-06	-0.112031	-0.261695	0.0359803	5	1	171710305	VAMP4	VAMP4 (+1081)
	cg18566313	1.28364e-10	5.37215e-06	-0.430832	-0.271695	0.0316445	6	4	186733428	SORBS2	SORBS2 (+144377)
	cg16467648	1.30485e-10	5.46093e-06	-0.0268857	-0.310825	-0.121139	4	1	217076832	ESRRG	ESRRG (-180038)
	cg27175093	1.30486e-10	5.46098e-06	0.00967719	0.158325	0.170774	9	14	57265910		OTX2 (+11276)
	cg16727318	1.35926e-10	5.68864e-06	-0.160674	-0.343233	-0.11687	4	2	25480416	DNMT3A	DNMT3A (+85042)
	cg09517106	1.36013e-10	5.69228e-06	-0.179017	-0.402835	-0.0177584	6	1	198904195		PTPRC (+296026)
	cg06637168	1.36293e-10	5.70398e-06	-0.176187	-0.398149	-0.0284987	6	11	46048663	PHF21A	PHF21A (+93897)
	cg08655134	1.36408e-10	5.70883e-06	-0.0676829	-0.281983	-0.138583	4	17	76890123	TIMP2	ENSG00000178404 (+9159)
	cg00739667	1.39003e-10	5.8174e-06	-0.52911	-0.303172	0.0136376	6	16	81731648	CMIP	PLCG2 (-81214)
	cg17658341	1.411e-10	5.90519e-06	0.0194442	0.182996	0.0384455	8	11	14043404	SPON1	RRAS2 (+337325)
	cg12097127	1.41854e-10	5.93672e-06	-0.207496	-0.0899634	-0.0995945	4	13	86239642		SLITRK6 (+133980)
	cg11615461	1.42012e-10	5.94333e-06	-0.210638	-0.400243	-0.0169097	6	5	152871571	GRIA1	GRIA1 (-160)
	cg06283848	1.4224e-10	5.95287e-06	-0.144563	-0.376041	-0.0651221	6	16	87500295	ZCCHC14	ZCCHC14 (+25355)
	cg15547001	1.42596e-10	5.96777e-06	0.206323	0.222019	0.0466474	8	11	115280059	CADM1	CADM1 (+95073)
	cg07263102	1.45144e-10	6.07443e-06	-0.1143	-0.250636	-0.0819772	6	20	46606002		SULF2 (-190673)
	cg23950756	1.46046e-10	6.11219e-06	-0.0350662	-0.293779	-0.133266	4	14	90989532		CALM1 (+126206)
	cg00181550	1.51158e-10	6.32613e-06	-0.0573793	-0.204603	-0.26044	4	1	220537369		RAB3GAP2 (-91574)
	cg15194019	1.52926e-10	6.40009e-06	-0.182825	-0.20625	-0.00848812	6	1	36852679	STK40	STK40 (-1195)
	cg20187047	1.54102e-10	6.44931e-06	-0.29975	-0.342689	-0.0271913	4	6	152702444	SYNE1	SYNE1 (+256089)
	cg15428140	1.61358e-10	6.75301e-06	-0.0472672	-0.419258	-0.102546	4	10	127220354		EDRF1 (-187790)
	cg21284015	1.63386e-10	6.83788e-06	-0.152889	-0.231342	-0.0386165	6	17	79420246	BAHCC1	ACTG1 (+59560)
	cg04733623	1.65222e-10	6.91471e-06	-0.0646519	-0.393938	-0.0878601	6	16	72232394		PMFBP1 (-26241)
	cg01346152	1.66897e-10	6.98483e-06	0.0959102	0.105369	0.115047	8	1	12678761	DHRS3	DHRS3 (-1025)
	cg06828335	1.68999e-10	7.07278e-06	-0.211023	-0.354672	-0.0559453	6	10	79238225	KCNMA1	KCNMA1 (+159174)
	cg25424250	1.73158e-10	7.24685e-06	-0.24722	-0.161519	-0.0384378	6	11	71421380		FAM86C1 (-77179)
	cg13736861	1.73235e-10	7.25007e-06	-0.176893	-0.277687	-0.0766431	6	11	92619556	FAT3	MTNR1B (-83329)
	cg18466911	1.738e-10	7.27371e-06	-0.119872	-0.273578	-0.00876723	5	6	33396263	SYNGAP1	SYNGAP1 (+8323)
	cg09468725	1.75132e-10	7.32945e-06	0.148398	0.0980885	0.0583822	8	9	124888062		TTLL11 (-32178)
	cg01182455	1.81134e-10	7.58066e-06	-0.29109	-0.237707	-0.0160319	6	9	131313189		SPTAN1 (-1679)
	cg07895164	1.83277e-10	7.67031e-06	-0.145374	-0.383003	-0.0369514	6	1	31849700		FABP3 (-3778)
	cg01363474	1.84118e-10	7.70552e-06	-0.268164	-0.300784	-0.0541374	6	4	6344484	PPP2R2C	PPP2R2C (+39112)
	cg07348641	1.85356e-10	7.75735e-06	-0.107391	-0.351063	-0.157861	4	13	25746495	FAM123A	AMER2 (-71)
	cg20956738	1.86908e-10	7.8223e-06	-0.0238184	0.263721	0.113014	9	18	55108537	ONECUT2	ONECUT2 (+5621)
	cg18298127	1.87205e-10	7.83472e-06	-0.121561	-0.318307	-0.0820837	6	1	201643315	NAV1	NAV1 (+25939)
	cg25238978	1.87299e-10	7.83864e-06	0.0429714	-0.194244	-0.182884	1	3	66349230	SLC25A26	LRIG1 (+202125)
	cg26499663	1.89538e-10	7.93235e-06	0.0112288	0.314062	0.106297	8	8	61835175		CHD7 (+243839)
	cg27496117	1.91699e-10	8.02281e-06	-0.235222	-0.380268	0.0307989	6	3	13830636		WNT7A (+90981)
	cg27230472	2.02408e-10	8.47096e-06	-0.153269	-0.330494	-0.144685	4	16	78601767	WWOX	WWOX (+468458)
	cg23316987	2.1765e-10	9.10888e-06	-0.0204662	0.188435	0.100263	9	14	57272594	OTX2	OTX2 (+4592)
	cg02046552	2.17804e-10	9.1153e-06	-0.318527	-0.292258	-0.0437172	6	8	21914287	EPB49	DMTN (-2429)
	cg24170996	2.21458e-10	9.26823e-06	-0.0277009	-0.205165	0.0138828	5	6	13614640	SIRT5	NOL7 (-918)
	cg22043544	2.22107e-10	9.2954e-06	-0.225682	-0.179036	-0.0728112	6	4	169461374	PALLD	PALLD (+43120)
	cg09197332	2.26735e-10	9.4891e-06	-0.0199998	-0.251251	-0.049861	4	14	101376625		RTL1 (-25442)
	cg03170013	2.31424e-10	9.68533e-06	-0.0545377	-0.518547	-0.0929627	6	2	242811830	C2orf85	CXXC11 (-50)
	cg11912239	2.31722e-10	9.6978e-06	-0.0152933	-0.189963	-0.247297	1	17	76220608	BIRC5	TMEM235 (-7375)
	cg18101140	2.34608e-10	9.8186e-06	0.170608	0.259849	0.0842897	8	11	67142001	LOC100130987	CLCF1 (-794)
	cg21743182	2.36158e-10	9.88347e-06	-0.117323	-0.295054	-0.0920421	6	7	90339132	CDK14	CDK14 (+421)
	cg22961457	2.36462e-10	9.89618e-06	0.0617683	0.222784	0.0840433	8	20	62370310	LIME1	SLC2A4RG (-903)
	cg06105694	2.39032e-10	1.00037e-05	0.0767262	0.137902	0.06421	8	17	36585340		ARHGAP23 (+679)
	cg03183447	2.4074e-10	1.00752e-05	-0.24475	-0.326966	-0.0586492	6	3	141105876	ZBTB38	ZBTB38 (-777)
	cg06433063	2.43839e-10	1.02049e-05	-0.118307	-0.458109	-0.0395714	6	6	138572213	ARFGEF3	PBOV1 (-32587)
	cg02003175	2.45391e-10	1.02698e-05	-0.115856	-0.457176	-0.0414147	6	7	2897397		GNA12 (-13440)
	cg14508696	2.48003e-10	1.03792e-05	-0.0451267	-0.261104	-0.109953	4	15	74199578		LOXL1 (-19220)
	cg16979252	2.55312e-10	1.06851e-05	-0.241458	-0.297063	-0.0101346	6	12	110721072	ATP2A2	ATP2A2 (+1587)
	cg24694549	2.55619e-10	1.06979e-05	-0.222393	-0.296593	-0.0324557	6	12	67072769	GRIP1	GRIP1 (-17)
	cg20304857	2.55973e-10	1.07127e-05	-0.0273752	-0.259129	-0.164042	4	2	31298462	GALNT14	GALNT14 (+62550)
	cg16501452	2.56377e-10	1.07296e-05	-0.279746	-0.234581	-0.0592654	6	8	9534629	TNKS	TNKS (+121206)
	cg21094405	2.61267e-10	1.09343e-05	-0.427794	-0.164516	-0.0440608	6	13	113656117	MCF2L	MCF2L (+32583)
	cg10298741	2.6486e-10	1.10847e-05	0.0284018	-0.14962	-0.226887	1	16	73019173	ZFHX3	ZFHX3 (+63100)
	cg25714800	2.65163e-10	1.10974e-05	-0.0302225	-0.158051	-0.161328	4	10	30990538	SVILP1	LYZL2 (-71848)
	cg08800396	2.6576e-10	1.11223e-05	-0.131684	-0.348793	-0.0363207	6	12	114200279		RBM19 (+203831)
	cg05228186	2.67876e-10	1.12109e-05	-0.038014	-0.154759	-0.279966	4	11	83393344	DLG2	CCDC90B (-395895)
	cg12395474	2.6883e-10	1.12508e-05	-0.0962128	-0.379719	-0.220831	4	17	74366059		SPHK1 (-14671)
	cg01363662	2.70549e-10	1.13227e-05	-0.378134	-0.215593	-0.0484185	6	15	76016306	ODF3L1	CSPG4 (-11118)
	cg27628891	2.7354e-10	1.14479e-05	-0.0379162	-0.672237	-0.0328161	6	2	242811864	C2orf85	CXXC11 (-16)
	cg02782895	2.8362e-10	1.18698e-05	-0.0302917	-0.272663	-0.0688985	6	3	127348828	PODXL2	PODXL2 (+805)
	cg21517016	2.91605e-10	1.2204e-05	-0.194338	-0.192342	-0.0659072	6	1	31162686		MATN1 (+33747)
	cg12464638	3.00291e-10	1.25675e-05	0.125502	0.223466	0.0959218	8	11	844400	TSPAN4	TSPAN4 (-45)
	cg24904788	3.00435e-10	1.25735e-05	-0.0574174	-0.216504	-0.0877909	6	11	45114842	PRDM11	PRDM11 (-54051)
	cg20902783	3.01311e-10	1.26102e-05	0.132493	0.202726	0.053344	8	14	21494071	NDRG2	NDRG2 (-949)
	cg01865609	3.0468e-10	1.27512e-05	-0.145112	-0.208559	-0.0194028	6	18	43913346	RNF165	RNF165 (-840)
	cg01174811	3.06271e-10	1.28177e-05	-0.0997837	-0.461581	-0.0241542	6	5	58882939	PDE4D	PDE4D (+306685)
	cg19455171	3.06789e-10	1.28394e-05	-0.0529912	-0.383521	-0.130627	4	14	100943011	WDR25	BEGAIN (+91395)
	cg12161599	3.06884e-10	1.28434e-05	0.00717241	-0.197677	-0.103219	1	5	7412809	ADCY2	ADCY2 (+16489)
	cg21387325	3.08521e-10	1.29119e-05	-0.0637743	-0.462831	0.0415067	5	17	39867146	GAST	GAST (-1431)
	cg06052200	3.09044e-10	1.29338e-05	0.0641747	-0.244763	-0.212067	1	18	49870300	DCC	DCC (+3759)
	cg16645704	3.10482e-10	1.2994e-05	-0.0177374	-0.298967	-0.16126	2	6	135187935		ALDH8A1 (+83324)
	cg27315635	3.17581e-10	1.32911e-05	-0.0738773	-0.3734	-0.123346	6	1	160050381	KCNJ9	KCNJ9 (-978)
	cg09441911	3.17904e-10	1.33046e-05	-0.163169	-0.221001	-0.182989	4	11	117758650		FXYD6 (-10754)
	cg14620531	3.18685e-10	1.33373e-05	-0.0964337	-0.324324	-0.14497	4	4	24887095	CCDC149	SOD3 (+90011)
	cg00980060	3.19437e-10	1.33688e-05	-0.239203	-0.298841	-0.0234733	6	1	14849511		KAZN (-75688)
	cg08548089	3.21659e-10	1.34617e-05	0.071157	0.205906	0.124486	8	1	156408887		C1orf61 (-9704)
	cg06717725	3.22804e-10	1.35097e-05	-0.254857	-0.258319	-0.0503849	6	20	459726		TBC1D20 (-16530)
	cg13442386	3.25186e-10	1.36094e-05	0.0229868	-0.155333	-0.289268	1	6	38145125	BTBD9	ZFAND3 (+357851)
	cg09767011	3.2558e-10	1.36258e-05	-0.273658	-0.109049	-0.0393599	6	6	22036696	CASC15	PRL (+261033)
	cg22043875	3.26422e-10	1.36611e-05	-0.0490062	-0.351604	-0.0142697	4	8	61653379	CHD7	CHD7 (+62043)
	cg07906401	3.29153e-10	1.37754e-05	-0.366958	-0.136563	-0.0598481	6	2	17981642		MSGN1 (-16120)
	cg27540313	3.29211e-10	1.37778e-05	-0.0331047	-0.1957	-0.241777	4	11	107590299		SLN (+119)
	cg09299086	3.31293e-10	1.3865e-05	-0.240794	-0.247077	-0.00740285	6	1	17746438	RCC2	RCC2 (+19781)
	cg26190835	3.44916e-10	1.44351e-05	-0.191201	-0.21135	-0.0328359	4	2	202937899		FZD7 (+38590)
	cg14243421	3.51815e-10	1.47238e-05	-0.263342	-0.190808	-0.133308	4	4	2873807	ADD1	ADD1 (+28224)
	cg05348436	3.63895e-10	1.52294e-05	-0.112174	-0.415075	-0.0148289	6	9	139120114	QSOX2	QSOX2 (+17572)
	cg18287154	3.65785e-10	1.53085e-05	-0.0602887	-0.305979	-0.00530004	5	10	25989993	LINC00836	MYO3A (-233202)
	cg08273785	3.66615e-10	1.53432e-05	0.234845	0.0826348	0.0382747	8	7	151137816	CRYGN	RHEB (+79193)
	cg24580398	3.67422e-10	1.5377e-05	0.104682	0.284869	0.0729155	8	22	19710566	38596	GP1BB (+99)
	cg18349175	3.70508e-10	1.55061e-05	0.215247	0.178283	0.0365678	8	19	1855612	KLF16	REXO1 (-7161)
	cg24424889	3.70624e-10	1.5511e-05	0.261489	0.173256	0.0655703	8	22	39494175	APOBEC3H	APOBEC3H (+896)
	cg11211563	3.74955e-10	1.56922e-05	0.486512	0.329478	0.007433	8	12	58003905	GEFT	ARHGEF25 (-57)
	cg15829114	3.75709e-10	1.57238e-05	-0.0981419	-0.378638	-0.0490056	6	14	53617878	DDHD1	DDHD1 (+1937)
	cg10274419	3.78026e-10	1.58208e-05	-0.076282	-0.270864	-0.264648	4	10	105641395	OBFC1	SH3PXD2A (-26232)
	cg13130930	3.82136e-10	1.59928e-05	0.00313076	-0.327965	-0.145874	2	2	197278875	HECW2	HECW2 (+178459)
	cg17708857	3.83921e-10	1.60675e-05	0.00523689	-0.237497	-0.275551	1	22	42829834	NFAM1	NFAM1 (-1434)
	cg10841437	3.87409e-10	1.62134e-05	0.0395259	-0.241122	-0.0943956	1	1	100010107		PALMD (-101391)
	cg02161478	3.89102e-10	1.62843e-05	0.0673586	0.186954	0.158388	8	14	57279669	OTX2OS1	OTX2 (-2483)
	cg11945128	3.98551e-10	1.66797e-05	-0.0227336	0.298567	0.0922974	9	2	45166531		SIX3 (-2370)
	cg01882539	4.00112e-10	1.67451e-05	0.0232742	-0.290502	-0.172515	1	17	32481208	ACCN1	CCL2 (-101095)
	cg18511326	4.0252e-10	1.68459e-05	-0.480425	-0.24936	-0.0408932	6	18	13382093	LDLRAD4	LDLRAD4 (+163308)
	cg23301371	4.03623e-10	1.6892e-05	-0.104083	-0.141838	-0.132591	2	8	102248210		ZNF706 (-30696)
	cg01595717	4.06905e-10	1.70294e-05	-0.111504	-0.417965	-0.0250035	6	9	140586201	EHMT1	EHMT1 (+72748)
	cg01328473	4.07655e-10	1.70608e-05	0.0818785	0.253898	0.106664	8	2	1711966	PXDN	PXDN (+36311)
	cg27147114	4.13509e-10	1.73057e-05	0.0194905	-0.282591	-0.0322685	1	15	79358128	RASGRF1	RASGRF1 (+24986)
	cg07925311	4.1379e-10	1.73175e-05	-0.207811	-0.118389	-0.012961	6	16	57835436	KIFC3	KIFC3 (+1063)
	cg13928756	4.14554e-10	1.73495e-05	-0.14068	-0.0858568	-0.10467	4	5	172303130	ERGIC1	ERGIC1 (+41853)
	cg12338731	4.14559e-10	1.73497e-05	-0.121932	-0.214408	-0.101645	6	7	7031197		CCZ1B (-164797)
	cg14213590	4.20886e-10	1.76145e-05	0.0168846	0.490017	0.0770637	8	9	139237503	GPSM1	GPSM1 (+15572)
	cg02915920	4.26366e-10	1.78439e-05	-0.281067	-0.265788	-0.0838913	6	9	133736469	ABL1	QRFP (+32755)
	cg01373602	4.2889e-10	1.79495e-05	-0.1827	-0.335611	0.0118469	6	10	18468886	CACNB2	CACNB2 (+39281)
	cg15686949	4.28958e-10	1.79523e-05	-0.035899	-0.491755	-0.0407818	4	5	32532223		SUB1 (-53381)
	cg25834831	4.3239e-10	1.8096e-05	-0.260048	-0.158666	-0.062771	6	X	137007816		ZIC3 (+359516)
	cg21416692	4.33626e-10	1.81477e-05	-0.022094	-0.17141	-0.149647	4	1	33803805	PHC2	A3GALT2 (-17107)
	cg00814614	4.36316e-10	1.82603e-05	-0.0177892	-0.214138	-0.187328	4	12	81544241	ACSS3	ACSS3 (+73252)
	cg12055940	4.41253e-10	1.84669e-05	-0.177722	-0.240172	-0.0460866	6	11	71421279		FAM86C1 (-77280)
	cg25705792	4.44567e-10	1.86056e-05	-0.320564	-0.247365	0.0749265	5	21	35320017	LINC00649	ATP5O (-31734)
	cg02890772	4.48184e-10	1.87569e-05	0.00506957	-0.148786	-0.2042	1	7	788831	DNAAF5	HEATR2 (+22494)
	cg03536904	4.48448e-10	1.8768e-05	-0.129401	-0.382976	0.012467	5	X	132363757		TFDP3 (-11382)
	cg20674658	4.64079e-10	1.94222e-05	-0.162949	-0.183333	-0.060275	4	1	201969012	RNPEP	ELF3 (-8060)
	cg12747180	4.68108e-10	1.95908e-05	-0.0672412	-0.31583	-0.0459962	4	3	123163096	ADCY5	ADCY5 (+5508)
	cg23032993	4.69562e-10	1.96516e-05	-0.04926	-0.274964	-0.107879	4	2	3128880		TRAPPC12 (-254576)
	cg25052014	4.71556e-10	1.97351e-05	0.0883428	0.263434	0.0879616	8	10	134596873	INPP5A	NKX6-2 (+2682)
	cg04018474	4.7323e-10	1.98051e-05	0.227353	0.218365	0.00492514	8	16	31008003	STX1B	HSD3B7 (+11472)
	cg15976883	4.74478e-10	1.98574e-05	0.0164355	0.239335	0.0175408	8	4	54960972		GSX2 (-5225)
	cg18553781	4.78857e-10	2.00406e-05	-0.0377413	-0.281145	-0.100018	4	6	91606033		MAP3K7 (-309270)
	cg07830403	4.80534e-10	2.01108e-05	-0.183022	-0.279185	0.0235913	5	5	71405658	MAP1B	MAP1B (+2598)
	cg11255590	4.83932e-10	2.0253e-05	-0.541455	-0.1172	-0.0392194	6	17	986855	ABR	TIMM22 (+86499)
	cg15494458	4.85462e-10	2.03171e-05	-0.196033	-0.257866	-0.154347	6	20	36931512	BPI	BPI (-1012)
	cg13974894	4.86502e-10	2.03606e-05	0.00799574	0.293807	0.139293	9	10	115069483		HABP2 (-243301)
	cg05287917	4.87808e-10	2.04152e-05	-0.00868461	-0.129744	-0.226029	1	14	104789261		C14orf144 (+78721)
	cg10754121	4.88362e-10	2.04384e-05	-0.0169611	-0.377853	-0.0232074	5	6	37596771		MDGA1 (+68994)
	cg21237418	4.88553e-10	2.04464e-05	0.00446532	0.110203	0.0579701	9	17	27045043	RAB34	RAB34 (+242)
	cg03399945	4.88996e-10	2.0465e-05	-0.388459	-0.124274	-0.0530971	6	13	54357026		OLFM4 (+754133)
	cg18832639	4.90114e-10	2.05117e-05	-0.348253	-0.232813	-0.0704241	4	17	27382138	PIPOX	PIPOX (+12221)
	cg06634717	4.90264e-10	2.0518e-05	-0.00307865	-0.172706	-0.244224	1	1	8442507	RERE	SLC45A1 (+64622)
	cg19812050	4.97485e-10	2.08202e-05	0.220832	0.242418	0.0556644	8	19	1471537	APC2	C19orf25 (+8017)
	cg00469083	5.00756e-10	2.09571e-05	-0.0888079	-0.357706	-0.12914	4	16	78601838	WWOX	WWOX (+468529)
	cg09402243	5.0359e-10	2.10757e-05	-0.00110438	-0.332923	-0.104637	4	11	112126301	PLET1	PLET1 (+5281)
	cg23768127	5.08614e-10	2.1286e-05	-0.179827	-0.304788	-0.0729401	6	9	38008499	SHB	SHB (+60708)
	cg12947768	5.1177e-10	2.14181e-05	-0.290345	-0.0563434	-0.124423	4	6	110888079		SLC22A16 (-90236)
	cg15696816	5.14156e-10	2.15179e-05	0.417893	0.185775	0.00902531	8	17	17713886	RAI1	SREBF1 (+26414)
	cg01768814	5.18507e-10	2.17e-05	-0.437583	-0.152534	-0.039069	6	17	65437355	PITPNC1	PITPNC1 (+63085)
	cg10609001	5.20605e-10	2.17878e-05	-0.328873	-0.325119	-0.037392	6	5	149893466	NDST1	NDST1 (+5793)
	cg18281910	5.24509e-10	2.19512e-05	-0.256421	-0.158065	-0.0376657	4	1	236635177	EDARADD	LGALS8 (-46395)
	cg12904114	5.37152e-10	2.24804e-05	-0.210825	-0.151265	0.0160848	5	2	96930658	CIAO1	TMEM127 (+1073)
	cg16725974	5.40701e-10	2.26289e-05	-0.106684	-0.178771	-0.167975	4	14	64341178	SYNE2	SYNE2 (+21496)
	cg09792711	5.4122e-10	2.26506e-05	-0.0241554	-0.170533	-0.0862557	4	14	104787656		C14orf144 (+77116)
	cg18396275	5.4301e-10	2.27255e-05	0.00569549	0.142983	0.18927	9	17	42392875	RUNDC3A	RUNDC3A (+6949)
	cg03012544	5.47169e-10	2.28996e-05	0.0196561	-0.227963	-0.0611917	1	8	24773268	NEFM	NEFM (+2744)
	cg25140054	5.56223e-10	2.32785e-05	0.0166908	-0.236008	-0.12189	1	11	8059621	TUB	TUB (-558)
	cg13326840	5.57749e-10	2.33423e-05	-0.0191731	0.318639	0.0567298	9	X	25014481	POLA1	ARX (+19583)
	cg14610236	5.58077e-10	2.33561e-05	0.0527543	-0.276036	-0.198618	1	5	143581812	KCTD16	KCTD16 (-3027)
	cg03368627	5.6145e-10	2.34973e-05	-0.543335	0.0600042	0.0448651	7	7	122056647	CADPS2	FEZF1 (-112089)
	cg19453742	5.64489e-10	2.36244e-05	0.019296	-0.140583	-0.242067	1	10	98862320	SLIT1	SLIT1 (+83356)
	cg19776466	5.6579e-10	2.36789e-05	0.0435382	-0.21511	-0.211321	1	8	41134635	SFRP1	SFRP1 (+32380)
	cg14720773	5.68847e-10	2.38068e-05	0.0395215	0.158903	0.109182	8	17	17603531	RAI1	RAI1 (+18745)
	cg25966016	5.69755e-10	2.38448e-05	-0.319724	-0.155914	-0.00870845	6	10	134353618	INPP5A	INPP5A (+2295)
	cg05826596	5.71988e-10	2.39383e-05	-0.171694	-0.0837128	-0.0825361	4	17	42516205	GPATCH8	ITGA2B (-49333)
	cg21010298	5.73353e-10	2.39954e-05	0.306973	0.103955	0.0267626	8	X	40007065	BCOR	BCOR (-50410)
	cg23606089	5.83231e-10	2.44088e-05	-0.0758593	-0.221648	-0.109704	4	11	132342792	OPCML	OPCML (+470773)
	cg15308095	5.84655e-10	2.44684e-05	-0.0387085	-0.209156	-0.0328444	4	1	52428424	RAB3B	RAB3B (+28011)
	cg25070639	5.89043e-10	2.4652e-05	-0.38284	-0.166847	-0.0386568	4	17	41170693	VAT1	VAT1 (+3741)
	cg05527581	5.96555e-10	2.49664e-05	-0.0959247	-0.196657	-0.100924	4	1	8230043		ERRFI1 (-143676)
	cg16596957	6.01858e-10	2.51884e-05	-0.187444	-0.257141	0.00741187	6	16	87575150		ZCCHC14 (-49500)
	cg21423741	6.0656e-10	2.53852e-05	0.0470589	0.107011	0.0584826	8	3	71099193	FOXP1	FOXP1 (+80794)
	cg08085540	6.14973e-10	2.57372e-05	-0.26617	-0.277557	-0.00261168	6	1	182708942		NPL (-52451)
	cg15133578	6.151e-10	2.57425e-05	-0.258934	-0.0454312	-0.149058	4	11	112688412		NCAM1 (-143745)
	cg21081039	6.20138e-10	2.59534e-05	-0.0942152	-0.296091	-0.0978252	6	20	46606504		SULF2 (-191175)
	cg19976235	6.25273e-10	2.61683e-05	0.0225346	0.34674	0.133839	8	14	57272858	OTX2	OTX2 (+4328)
	cg05970317	6.25691e-10	2.61858e-05	-0.108039	-0.270367	-0.190615	4	7	70111180	AUTS2	WBSCR17 (-485974)
	cg18888655	6.35382e-10	2.65914e-05	0.11121	0.20818	0.0632213	8	19	17403176	ABHD8	ANKLE1 (+10723)
	cg23245485	6.38578e-10	2.67251e-05	0.254109	0.125967	0.0304801	8	12	6484219	SCNN1A	SCNN1A (+170)
	cg01722003	6.39413e-10	2.67601e-05	-0.0284482	-0.134779	-0.168493	1	7	147987957	CNTNAP2	CUL1 (-408046)
	cg10821304	6.40245e-10	2.67949e-05	0.334698	0.216088	0.0181514	8	5	176558909	NSD1	NSD1 (-2016)
	cg11149194	6.44253e-10	2.69626e-05	-0.0968788	-0.373535	-0.0885023	6	14	27245119		NOVA1 (-178160)
	cg04393855	6.46305e-10	2.70485e-05	0.0650368	0.244359	0.129844	8	1	151042871	GABPB2	CDC42SE1 (-71)
	cg12629991	6.51515e-10	2.72665e-05	-0.0203165	-0.224264	-0.198021	1	1	164627790	PBX1	PBX1 (+98919)
	cg26020069	6.53824e-10	2.73632e-05	-0.300625	-0.115624	-0.0257381	4	6	52382441	TRAM2	TRAM2 (+59271)
	cg21692039	6.65156e-10	2.78374e-05	0.27308	0.203786	0.0281456	8	7	69086792	AUTS2	AUTS2 (+22474)
	cg11400765	6.713e-10	2.80946e-05	0.00792127	-0.181867	-0.12774	1	17	74589657		ST6GALNAC2 (-7448)
	cg04786592	6.76418e-10	2.83088e-05	0.0199423	0.212966	0.120212	9	13	52375776	DHRS12	DHRS12 (+2482)
	cg18952026	7.11153e-10	2.97625e-05	0.0688466	0.212722	0.057826	8	12	1940380	LRTM2	LRTM2 (+10948)
	cg26692531	7.11316e-10	2.97693e-05	-0.178209	-0.383822	-0.0527094	6	6	152702370	SYNE1-AS1	SYNE1 (+256163)
	cg22462657	7.1314e-10	2.98456e-05	-0.100236	-0.335316	0.0182152	5	5	68326727		SLC30A5 (-62745)
	cg14118226	7.13631e-10	2.98662e-05	-0.0666212	-0.466218	-0.0186224	6	14	70010567		KIAA0247 (-67745)
	cg02615520	7.20743e-10	3.01638e-05	-0.419729	-0.205228	-0.057555	6	6	90272480	ANKRD6	ANKRD6 (+361)
	cg06128123	7.24357e-10	3.0315e-05	-0.169981	-0.240042	-0.0482384	4	6	21846231	FLJ22536	SOX4 (+252260)
	cg02370877	7.25339e-10	3.03562e-05	-0.021941	0.203394	0.101197	9	8	76316876		HNF4G (-135227)
	cg06131895	7.28011e-10	3.0468e-05	-0.0389473	-0.394929	-0.147355	4	5	32531950		SUB1 (-53654)
	cg06034194	7.4147e-10	3.10313e-05	0.00347209	-0.450027	-0.0293907	3	9	12814626	LURAP1L-AS1	TYRP1 (+121192)
	cg03891346	7.44122e-10	3.11423e-05	-0.0921557	-0.32614	-0.0540085	6	11	121970725	LOC399959	BLID (+16197)
	cg14570643	7.45515e-10	3.12005e-05	-0.0154195	-0.208053	-0.241741	4	7	69881724	AUTS2	WBSCR17 (-715430)
	cg23200760	7.49443e-10	3.13649e-05	-0.014879	-0.352719	-0.0571863	4	11	112126289	PLET1	PLET1 (+5293)
	cg19491196	7.56374e-10	3.1655e-05	-0.253342	-0.321369	-0.0179432	6	6	141785938		NMBR (+623997)
	cg07261071	7.57566e-10	3.17049e-05	-0.116804	-0.369106	-0.0978737	6	10	105262711	NEURL1	NEURL1 (+8976)
	cg07703783	7.61306e-10	3.18614e-05	-0.0559798	-0.446638	-0.117648	4	16	89070719		CBFA2T3 (-27108)
	cg00287190	7.62597e-10	3.19154e-05	-0.71058	0.147297	0.0378305	7	2	105405833		POU3F3 (-66135)
	cg00737264	7.63402e-10	3.19491e-05	-0.0651015	-0.204166	-0.244877	4	6	169049498	SMOC2	SMOC2 (+207668)
	cg09967715	7.65991e-10	3.20575e-05	-0.330418	-0.192269	0.00622406	6	14	90958134		CALM1 (+94808)
	cg10161008	7.74776e-10	3.24251e-05	0.152743	0.235349	0.0239991	8	11	63766546	MACROD1	OTUB1 (+12662)
	cg13112511	7.76747e-10	3.25077e-05	-0.223209	-0.252814	-0.0877034	6	5	58882753	PDE4D	PDE4D (+306871)
	cg08841048	7.80183e-10	3.26515e-05	-0.142787	-0.114501	-0.0439756	6	19	44124409	ZNF428	ZNF428 (-384)
	cg05782224	7.8351e-10	3.27907e-05	-0.0388342	-0.342205	-0.0584357	4	9	2243122		SMARCA2 (+221178)
	cg03189910	7.90634e-10	3.30888e-05	-0.363384	-0.186799	-0.0572512	6	20	11917118		BTBD3 (+45643)
	cg25814383	7.91066e-10	3.31069e-05	0.246297	0.297341	0.0789614	8	19	19336240	NCAN	NCAN (+13459)
	cg07865723	7.91604e-10	3.31294e-05	-0.0315575	-0.266329	-0.137631	4	1	11514438		PTCHD2 (-24856)
	cg03528069	7.9425e-10	3.32402e-05	-0.123695	-0.231998	-0.104233	4	3	117604167		NONE
	cg11067405	8.00848e-10	3.35163e-05	-0.053749	-0.194525	-0.301639	4	14	97080984		PAPOLA (+112275)
	cg03754620	8.01394e-10	3.35392e-05	0.0190692	-0.187083	-0.196614	1	20	57697742		ZNF831 (-68332)
	cg01016257	8.02274e-10	3.3576e-05	-0.208539	-0.303435	-0.0319955	6	1	117640285	TTF2	TRIM45 (+24064)
	cg12771255	8.0527e-10	3.37013e-05	-0.0553919	-0.110977	-0.184931	4	18	8789011	MTCL1	SOGA2 (+71643)
	cg25909064	8.15518e-10	3.41302e-05	0.290104	0.139171	0.0329983	8	11	120082805	OAF	OAF (+1331)
	cg27190843	8.17458e-10	3.42114e-05	-0.0513528	-0.241787	-0.0409781	6	11	6440968	APBB1	APBB1 (-669)
	cg16267958	8.19572e-10	3.42999e-05	0.0179069	-0.207162	-0.295465	1	10	53081987	PRKG1	PRKG1 (+248054)
	cg01245567	8.2197e-10	3.44003e-05	-0.126437	-0.303692	0.0545233	5	4	189048735		TRIML1 (-11837)
	cg04384234	8.28841e-10	3.46878e-05	-0.398236	-0.175388	-0.0359508	4	16	75411784	CFDP1	CFDP1 (+55598)
	cg16411883	8.29325e-10	3.47081e-05	-0.134674	-0.201806	0.0172973	5	5	106878353	EFNA5	EFNA5 (+128242)
	cg13656878	8.30775e-10	3.47688e-05	-0.0177076	0.140514	0.0953551	9	9	119048807	PAPPA	PAPPA-AS1 (+114077)
	cg00553487	8.46606e-10	3.54313e-05	-0.295295	-0.241707	-0.0107269	6	19	42570406	GRIK5	GRIK5 (-485)
	cg07521187	8.483e-10	3.55022e-05	-0.0943294	-0.320125	-0.015882	6	16	14280709	MKL2	MKL2 (+107565)
	cg21971539	8.54537e-10	3.57632e-05	-0.233099	-0.212436	-0.105887	4	14	39734390	CTAGE5	CTAGE5 (-1937)
	cg03217906	8.54836e-10	3.57757e-05	-0.145229	-0.290983	-0.0541736	6	6	127838893	SOGA3	ENSG00000255330 (+1252)
	cg18037145	8.58353e-10	3.59229e-05	-0.060762	-0.429675	-0.148949	4	13	33420376	LINC00423	KL (-170194)
	cg15820711	8.59844e-10	3.59853e-05	-0.459201	-0.153819	-0.049557	6	7	152482243	ACTR3B	ACTR3B (+25410)
	cg22880183	8.72611e-10	3.65197e-05	-0.0913444	-0.426006	-0.0283268	6	10	7127254		SFMBT2 (+324048)
	cg10670310	8.73553e-10	3.65591e-05	-0.278013	-0.122091	0.0225113	5	12	113494422	DTX1	DTX1 (-1072)
	cg04529472	8.74291e-10	3.659e-05	-0.113464	-0.495863	-0.0932053	6	7	55620588	VOPP1	VOPP1 (+19629)
	cg23692114	8.80911e-10	3.6867e-05	-0.0163765	-0.21943	-0.256252	1	2	75154873	LINC01291	POLE4 (-30745)
	cg07804711	8.84126e-10	3.70016e-05	0.0814142	0.332922	0.12472	8	19	46142647	MIR330	EML2 (+6239)
	cg04013162	8.8736e-10	3.71369e-05	-0.00606973	0.187903	0.10192	9	11	45119615	PRDM11	PRDM11 (-49278)
	cg20403075	8.90171e-10	3.72546e-05	-0.0113908	-0.339527	-0.103304	4	1	62438955	INADL	L1TD1 (-221547)
	cg13630043	8.93119e-10	3.73779e-05	0.0384503	0.0921424	0.140951	9	10	119307769	EMX2	EMX2 (+5815)
	cg10426105	8.93165e-10	3.73798e-05	0.00157448	-0.187086	-0.140453	1	17	75400173	40057	SEPT9 (+122682)
	cg16391199	8.95362e-10	3.74718e-05	-0.0412151	-0.277408	-0.164182	4	11	35736766	TRIM44	TRIM44 (+52414)
	cg18174834	8.95463e-10	3.7476e-05	-0.213286	-0.268779	-0.0231018	6	1	212740460	ATF3	ATF3 (-41551)
	cg08087184	8.99656e-10	3.76515e-05	-0.0535562	-0.195571	-0.0504377	6	17	79446417		ACTG1 (+33389)
	cg07296835	9.01897e-10	3.77453e-05	0.0192374	-0.211691	-0.185339	1	8	41134425	SFRP1	SFRP1 (+32590)
	cg13416381	9.06334e-10	3.7931e-05	-0.261441	-0.196615	-0.0157189	4	17	46090231		COPZ2 (+24907)
	cg21320334	9.08473e-10	3.80205e-05	-0.0895582	-0.205781	-0.165541	4	18	40695592	RIT2	RIT2 (+63)
	cg27002639	9.09347e-10	3.80571e-05	-0.0288856	-0.294984	-0.17028	4	16	78601961	WWOX	WWOX (+468652)
	cg19731612	9.19487e-10	3.84814e-05	0.284959	0.316504	0.0342671	8	5	176559334	NSD1	NSD1 (-1591)
	cg05475515	9.24994e-10	3.87119e-05	-0.152705	-0.201818	-0.0760646	4	7	2932384		GNA12 (-48427)
	cg00902185	9.26663e-10	3.87818e-05	-0.148893	-0.202029	-0.0451664	6	22	20232832	RTN4R	RTN4R (+23221)
	cg05551825	9.274e-10	3.88126e-05	-0.00662056	-0.249321	-0.208655	4	7	5735129	RNF216	RNF216 (+86240)
	cg16611727	9.28919e-10	3.88762e-05	-0.14591	-0.289521	-0.0707955	6	2	26781761	OTOF	OTOF (-196)
	cg25418200	9.29373e-10	3.88952e-05	-0.0462063	-0.264837	-0.173373	1	17	48672432	CACNA1G	CACNA1G (+33612)
	cg22796638	9.31974e-10	3.9004e-05	-0.330276	-0.069927	-0.1016	4	18	68045398		SOCS6 (+89262)
	cg07514306	9.3335e-10	3.90616e-05	0.0136608	-0.210182	-0.233473	1	7	129934352	CPA4	CPA4 (+1360)
	cg05256504	9.34373e-10	3.91044e-05	-0.0297831	0.199508	0.0388889	9	7	121947072		FEZF1 (-2514)
	cg08209473	9.37506e-10	3.92356e-05	0.069358	0.156888	0.0432783	8	16	48399769	SIAH1	SIAH1 (+42)
	cg07570498	9.39098e-10	3.93022e-05	-0.245548	-0.202372	-0.0434424	6	1	33813321	PHC2	A3GALT2 (-26623)
	cg12043230	9.5828e-10	4.0105e-05	-0.0363215	-0.364927	0.0650604	5	12	2405312	CACNA1C	CACNA1C (+242584)
	cg25202407	9.68686e-10	4.05405e-05	0.268187	0.280216	0.0530479	8	1	205417560	MIR135B	LEMD1 (-26379)
	cg14779401	9.68883e-10	4.05487e-05	-0.0587844	-0.102767	-0.178265	2	1	206299388		C1orf186 (-10742)
	cg02637206	9.69175e-10	4.05609e-05	-0.0933263	-0.172242	-0.0711988	6	16	15116213	PDXDC1	NTAN1 (+33707)
	cg12492938	9.76548e-10	4.08695e-05	0.112676	0.227646	0.0304805	8	12	114025383		LHX5 (-115507)
	cg06998540	9.76731e-10	4.08772e-05	-0.287996	-0.235401	-0.067368	6	X	149437905		MAMLD1 (-93780)
	cg22610645	9.78227e-10	4.09398e-05	0.437993	0.290784	0.00165283	8	12	58003898	GEFT	ARHGEF25 (-64)
	cg02868479	1.00313e-09	4.1982e-05	-0.10015	-0.0800313	-0.19091	4	17	54831		DOC2B (-23405)
	cg23971110	1.00404e-09	4.20199e-05	0.0453604	0.130842	0.112206	9	6	99275960		POU3F2 (-6619)
	cg10724965	1.00507e-09	4.20633e-05	0.0351952	-0.276674	-0.137136	1	8	25543202		CDCA2 (+226690)
	cg24736886	1.00533e-09	4.20742e-05	-0.176999	-0.283555	-0.0351098	6	13	72195560	DACH1	DACH1 (+245769)
	cg07031821	1.0166e-09	4.25457e-05	-0.0693034	-0.143043	-0.0808341	4	15	67303912		SMAD3 (-54270)
	cg00982500	1.0201e-09	4.26922e-05	-0.35285	-0.114083	0.0506368	5	10	127396811	LOC283038	EDRF1 (-11333)
	cg09135625	1.02758e-09	4.30051e-05	0.0160111	-0.174762	-0.0952209	1	5	124820521		ZNF608 (-739404)
	cg19803383	1.02816e-09	4.30294e-05	-0.0648045	-0.407568	0.00773654	5	1	200115548	NR5A2	NR5A2 (+118819)
	cg06179011	1.03214e-09	4.31959e-05	0.26752	0.140872	0.0246363	8	11	843897	TSPAN4	TSPAN4 (-548)
	cg05471323	1.03326e-09	4.32431e-05	-0.135017	-0.278204	-0.0832951	6	12	95806891		METAP2 (-60835)
	cg17244485	1.03705e-09	4.34014e-05	-0.27326	-0.209746	-0.0266235	6	2	103443515		TMEM182 (+65044)
	cg07501635	1.04847e-09	4.38796e-05	-0.267655	-0.239714	-0.064856	6	3	53714168	CACNA1D	CHDH (+166248)
	cg00285940	1.04867e-09	4.38881e-05	-0.151313	-0.200888	-0.075158	6	1	234906223		IRF2BP2 (-160953)
	cg14334161	1.05114e-09	4.39914e-05	0.275548	0.186393	0.00622326	8	10	72201622	NODAL	NODAL (-200)
	cg01634320	1.05217e-09	4.40343e-05	-0.0325285	-0.197038	-0.211508	4	13	93901456	GPC6	GPC6 (+22362)
	cg14912355	1.05612e-09	4.41996e-05	-0.0815471	-0.23537	-0.0683529	4	11	86454834		PRSS23 (-56447)
	cg01620165	1.05636e-09	4.42098e-05	0.210353	0.130346	0.0225693	8	12	113530915	DTX1	DTX1 (+35421)
	cg06083020	1.05957e-09	4.43439e-05	-0.228201	-0.112392	0.0105535	6	17	38225121	THRA	THRA (+6059)
	cg08457421	1.06101e-09	4.44044e-05	0.119965	0.254312	0.0851204	8	22	31536431	PLA2G3	PLA2G3 (+161)
	cg12510724	1.0611e-09	4.44082e-05	0.439047	0.162944	-0.00897159	8	12	6484607	SCNN1A	SCNN1A (-218)
	cg04270048	1.06421e-09	4.45383e-05	0.126063	0.144969	0.0556577	8	20	33296729	TP53INP2	TP53INP2 (+4636)
	cg09065672	1.07136e-09	4.48375e-05	-0.0176317	-0.379513	-0.0676657	6	18	42596693	SETBP1	SETBP1 (+335831)
	cg13620881	1.07145e-09	4.48413e-05	0.11401	0.0692087	0.0742641	8	6	10888129	SYCP2L	SYCP2L (+1066)
	cg18350619	1.07211e-09	4.48689e-05	0.134805	0.224477	-0.0098063	8	2	211342480	LANCL1	CPS1 (+48)
	cg15981626	1.07526e-09	4.50005e-05	0.070918	0.326306	0.135131	8	3	71355303	FOXP1	FOXP1 (-175316)
	cg23580639	1.07542e-09	4.50072e-05	-0.245941	-0.0581804	-0.119515	4	17	35630524	ACACA	C17orf78 (-102460)
	cg22320365	1.07548e-09	4.50098e-05	0.0478422	0.17432	0.0619914	8	17	36718198	SRCIN1	SRCIN1 (+43984)
	cg19305903	1.076e-09	4.50315e-05	-0.324569	-0.296223	-0.0344315	4	19	11203039	LDLR	LDLR (+3002)
	cg27154487	1.07808e-09	4.51188e-05	0.000423538	-0.302131	-0.15021	4	12	109220235	SSH1	SSH1 (+31130)
	cg14471282	1.0837e-09	4.5354e-05	0.0244096	-0.131242	-0.124854	1	2	134179408	MIR7853	NCKAP5 (+146622)
	cg00134210	1.09257e-09	4.5725e-05	-0.0311059	-0.537517	0.0437779	5	10	14644132	FAM107B	CDNF (+235938)
	cg21269117	1.09331e-09	4.57563e-05	-0.0810223	-0.263054	-0.0509124	6	10	116761428		TRUB1 (+63477)
	cg09842685	1.09585e-09	4.58624e-05	0.0808866	0.200416	0.0267857	8	12	4492769		FGF23 (-3876)
	cg26421442	1.09913e-09	4.59995e-05	-0.0420175	-0.11266	-0.0901705	4	12	15200961		PDE6H (+75006)
	cg00016968	1.09956e-09	4.60178e-05	0.0599994	0.135241	0.0137643	8	1	113250448	RHOC	RHOC (-700)
	cg00781473	1.10065e-09	4.60633e-05	-0.118714	-0.174319	-0.117538	2	15	86860745	AGBL1-AS1	AGBL1 (+175519)
	cg17356452	1.1007e-09	4.60653e-05	-0.186851	-0.367095	-0.0586691	4	3	141105920	ZBTB38	ZBTB38 (-733)
	cg10918624	1.10745e-09	4.63481e-05	-0.181337	-0.171257	-0.125206	6	4	89627891	HERC3	NAP1L5 (-8506)
	cg04954975	1.12164e-09	4.69419e-05	-0.239588	-0.256361	0.0753584	5	10	4066366		KLF6 (-238900)
	cg09723161	1.12866e-09	4.72356e-05	0.0030113	0.187838	0.130948	9	7	2563909	LFNG	LFNG (+4434)
	cg22034511	1.13402e-09	4.746e-05	-0.129225	-0.363257	-0.0132177	6	3	45109476		CLEC3B (+41802)
	cg12082609	1.13472e-09	4.74891e-05	0.120139	0.249447	-0.0372476	8	2	66671727	MEIS1	MEIS1 (+9196)
	cg21618948	1.13587e-09	4.75373e-05	-0.138379	-0.204465	-0.0291055	4	19	19600156	GATAD2A	NDUFA13 (-26407)
	cg22233189	1.1399e-09	4.77058e-05	-0.250118	-0.211142	-0.0654448	4	7	108233442		THAP5 (-23276)
	cg02361656	1.15144e-09	4.8189e-05	-0.0826643	-0.126615	-0.189609	4	6	86655290		SYNCRIP (-302288)
	cg21836121	1.15282e-09	4.82469e-05	-0.023794	-0.323031	-0.0390031	6	7	2912098		GNA12 (-28141)
	cg27654565	1.15811e-09	4.8468e-05	-0.104732	-0.182946	-0.134875	4	4	7696286	SORCS2	AFAP1 (+245366)
	cg06811467	1.17002e-09	4.89663e-05	-0.194111	-0.171982	-0.0266927	4	1	154299179	ATP8B2	ATP8B2 (-1096)
	cg23415442	1.17177e-09	4.90396e-05	-0.120954	-0.139179	-0.0460058	4	10	88855540	GLUD1	GLUD1 (-918)
	cg09529552	1.17585e-09	4.92103e-05	-0.0607168	-0.151592	-0.056849	4	21	39807400	ERG	KCNJ15 (+178738)
	cg16102262	1.18084e-09	4.94195e-05	-0.166895	-0.412027	-0.0564324	6	8	30495801	SMIM18	SMIM18 (-315)
	cg17620969	1.18879e-09	4.97522e-05	-0.0359542	-0.389435	0.0169201	5	17	231428		C17orf97 (-28689)
	cg17575365	1.21687e-09	5.09271e-05	0.0054738	-0.353536	-0.0869689	3	7	90339136	CDK14	CDK14 (+425)
	cg19510732	1.23194e-09	5.15581e-05	-0.229873	-0.226809	-0.102782	6	13	30717177		KATNAL1 (+164443)
	cg27076223	1.23197e-09	5.15592e-05	0.233659	0.333124	0.000771976	8	4	40632858	RBM47	RBM47 (-116084)
	cg06410328	1.23609e-09	5.17316e-05	-0.0949073	-0.130641	-0.171057	4	2	218475239	DIRC3	TNS1 (+333611)
	cg14484274	1.23919e-09	5.18615e-05	0.0670147	0.131313	0.107175	8	17	47090616	IGF2BP1	IGF2BP1 (+15843)
	cg09055341	1.25018e-09	5.23212e-05	-0.0943917	-0.132058	-0.112296	4	17	75400156	40057	SEPT9 (+122665)
	cg02971792	1.2555e-09	5.25441e-05	-0.0188811	-0.404759	-0.0388954	6	5	172001951		NEURL1B (-66317)
	cg20862184	1.26222e-09	5.28253e-05	-0.298064	-0.353071	-0.0469719	6	1	112452121	KCND3-AS1	KCND3 (+79655)
	cg10843343	1.26248e-09	5.2836e-05	0.10637	0.165084	0.0647478	8	12	53298027	KRT8	KRT8 (+22225)
	cg08692046	1.26424e-09	5.29097e-05	-0.30336	-0.32621	0.0322093	6	1	21501347	EIF4G3	EIF4G3 (+1995)
	cg22098511	1.26747e-09	5.3045e-05	-0.158026	-0.262861	-0.00116936	5	17	79476521		ACTG1 (+3285)
	cg14583558	1.27379e-09	5.33095e-05	-0.176437	-0.35191	0.0653727	5	22	39704978		RPL3 (+10797)
	cg10378758	1.2775e-09	5.34648e-05	-0.114975	-0.293403	-0.212168	4	21	45271715		RRP1 (+62322)
	cg03842440	1.28566e-09	5.38063e-05	-0.195131	-0.285809	-0.0562425	6	12	41831532	PDZRN4	PDZRN4 (+249283)
	cg20506347	1.28785e-09	5.38977e-05	-0.00109586	0.159402	0.124594	9	3	71355161	FOXP1	FOXP1 (-175174)
	cg24903551	1.29052e-09	5.40095e-05	-0.0429761	-0.503189	-0.111459	4	2	240678738		NDUFA10 (+286080)
	cg25256866	1.30014e-09	5.44124e-05	-0.0409393	-0.262262	-0.108112	4	10	35079264	PARD3	PARD3 (+24984)
	cg11919646	1.30296e-09	5.45302e-05	-0.161593	-0.136692	-0.138676	4	12	120663231	PXN	RPLP0 (-24330)
	cg00059309	1.30414e-09	5.45796e-05	0.00328935	-0.134163	-0.24837	1	17	78293397	RNF213	RNF213 (+58731)
	cg00029150	1.32574e-09	5.54835e-05	-0.359075	-0.18729	-0.0206077	6	3	195946348	SLC51A	SLC51A (+2974)
	cg09209510	1.32598e-09	5.54935e-05	-0.00148183	-0.40408	-0.108368	1	14	100288389	EML1	EML1 (+28710)
	cg25134556	1.32774e-09	5.55674e-05	-0.200147	-0.263147	-0.0350163	4	2	137005937		CXCR4 (-132125)
	cg09087271	1.3369e-09	5.59507e-05	-0.0706648	-0.0969699	-0.0463151	4	11	62359829	TUT1	TUT1 (-721)
	cg15886450	1.34264e-09	5.61908e-05	-0.620156	0.0996768	0.0947543	7	1	167874526	ADCY10	ADCY10 (+8813)
	cg20154143	1.34976e-09	5.64886e-05	-0.0259837	-0.107556	-0.0366878	3	1	3087709	PRDM16	PRDM16 (+101935)
	cg14365143	1.36438e-09	5.71008e-05	0.00468011	0.181307	0.10033	9	21	48088046		PRMT2 (+32485)
	cg04509429	1.37187e-09	5.74141e-05	-0.165171	-0.301452	-0.0985463	6	5	138441649	SIL1	SIL1 (+92437)
	cg15283292	1.38012e-09	5.77596e-05	0.0339137	-0.111589	-0.151504	1	10	61982007	ANK3	ANK3 (+167480)
	cg08218565	1.39413e-09	5.83459e-05	-0.000641401	-0.15255	-0.279409	1	19	35807055		CD22 (-13034)
	cg14177914	1.3977e-09	5.84952e-05	-0.0462813	0.249114	0.0711305	9	1	156400432	C1orf61	C1orf61 (-1249)
	cg00807698	1.40307e-09	5.87197e-05	-0.115473	-0.201866	-0.078153	6	1	168678926	DPT	DPT (+19575)
	cg05202136	1.40444e-09	5.87772e-05	-0.446763	-0.162669	-0.0166205	6	4	3250845	C4orf44	RGS12 (-65028)
	cg27362436	1.40498e-09	5.87998e-05	-0.1946	-0.0998012	-0.0297835	6	22	43144450		A4GALT (-53459)
	cg04403415	1.40656e-09	5.8866e-05	-0.119914	-0.101379	-0.110316	2	12	124991087	NCOR2	NCOR2 (-11290)
	cg08877090	1.41491e-09	5.92154e-05	0.00136409	-0.152569	-0.163284	1	22	47507771	TBC1D22A	TBC1D22A (+349254)
	cg20851038	1.41905e-09	5.93887e-05	-0.216842	-0.222942	0.00465819	6	16	86802070		FOXL1 (+189956)
	cg02341645	1.41997e-09	5.94271e-05	-0.0519696	-0.226912	-0.145384	4	17	71756141	C17orf54	SDK2 (-115914)
	cg07165260	1.42311e-09	5.95586e-05	-0.142156	-0.428927	0.0239472	6	16	85062881	KIAA0513	ZDHHC7 (-17774)
	cg23032661	1.42432e-09	5.96091e-05	0.274181	0.27084	0.0634817	8	22	19710386	38596	GP1BB (-81)
	cg12486887	1.42648e-09	5.96996e-05	-0.0103273	-0.239508	-0.169138	1	19	6238556	MLLT1	MLLT1 (+41402)
	cg15865436	1.4265e-09	5.97002e-05	0.178195	0.0784417	0.0499428	8	15	74046238		CD276 (+69685)
	cg17519645	1.44837e-09	6.06159e-05	0.573521	0.18987	-0.00141674	8	19	52206667	NCRNA00085	HAS1 (+20553)
	cg02454476	1.45283e-09	6.08025e-05	-0.271253	-0.234583	-0.0215316	6	15	68844912		CORO2B (-26660)
	cg26275878	1.46062e-09	6.11285e-05	-0.142648	-0.0904635	-0.224253	4	8	131034149		FAM49B (-82072)
	cg08604594	1.46636e-09	6.13686e-05	-0.0797046	-0.430491	-0.0195183	3	10	33798231		NRP1 (-173042)
	cg14673618	1.47069e-09	6.15498e-05	0.00958491	0.309599	0.048831	8	2	45170322	SIX3	SIX3 (+1421)
	cg19039481	1.47536e-09	6.17451e-05	-0.331778	-0.325794	-0.0781253	6	2	394115		FAM150B (-105820)
	cg22307022	1.47589e-09	6.17674e-05	-0.193917	-0.320299	-0.0751061	4	12	131300233	STX2	STX2 (+23505)
	cg20987429	1.47954e-09	6.19204e-05	-0.0485833	-0.262661	-0.130465	4	8	91553142		TMEM64 (+105168)
	cg23490727	1.48075e-09	6.1971e-05	-0.359388	-0.138375	-0.0380781	4	17	232332		C17orf97 (-27785)
	cg15573953	1.51041e-09	6.32121e-05	-0.269855	-0.197454	0.0456409	5	20	61366858	NTSR1	NTSR1 (+26670)
	cg09503767	1.51666e-09	6.34737e-05	-0.145001	-0.19976	0.00636272	6	9	132947677	NCS1	NCS1 (+12821)
	cg17422269	1.52101e-09	6.36559e-05	-0.363427	-0.147526	-0.0374767	6	7	46018132		IGFBP3 (-57283)
	cg06109482	1.52831e-09	6.39611e-05	0.272043	0.233323	0.00263308	8	2	232531087		PTMA (-42138)
	cg16826347	1.53724e-09	6.4335e-05	0.175998	0.182808	0.037082	8	19	42600200	POU2F2	ZNF574 (+25683)
	cg09992968	1.53989e-09	6.44458e-05	-0.462343	-0.202302	-0.0104675	6	15	92237449		SLCO3A1 (-159475)
	cg04971779	1.56352e-09	6.54347e-05	0.046501	0.143668	-0.0270051	8	6	44190729	SLC29A1	SLC29A1 (-633)
	cg19343518	1.56697e-09	6.55794e-05	-0.296562	-0.183295	-0.0534602	6	6	157508679	ARID1B	TMEM242 (+235953)
	cg14128315	1.57696e-09	6.59974e-05	-0.282821	-0.249422	0.00693582	6	4	1227091	CTBP1	CTBP1 (+15833)
	cg24107728	1.58211e-09	6.62128e-05	-0.0515433	-0.269736	-0.128813	4	1	53760337	LRP8	LRP8 (+33348)
	cg04098650	1.5829e-09	6.62461e-05	-0.308935	-0.31895	-0.0214985	6	X	110284375	PAK3	PAK3 (-81929)
	cg07604117	1.58678e-09	6.64083e-05	-0.200976	-0.304218	-0.0353685	4	6	152702365	SYNE1	SYNE1 (+256168)
	cg13419317	1.59288e-09	6.66636e-05	-0.00398221	-0.139093	-0.145643	1	20	24093739		GGTLC1 (-124324)
	cg03324138	1.60274e-09	6.70761e-05	0.0150179	-0.158459	-0.148925	1	1	2250410		RER1 (-72861)
	cg24066731	1.60752e-09	6.72764e-05	-0.50521	-0.0335896	-0.0638737	6	13	24844896	SPATA13	C1QTNF9 (-36407)
	cg00643814	1.61671e-09	6.76608e-05	-0.179831	-0.121761	-0.187857	4	12	106573195		NUAK1 (-39385)
	cg10899660	1.6234e-09	6.79409e-05	0.214539	0.172268	0.0459681	8	X	136658162		ZIC3 (+9862)
	cg09467944	1.62498e-09	6.80071e-05	-0.403602	-0.0331325	-0.159866	4	15	102075026		PCSK6 (-45154)
	cg19267626	1.6292e-09	6.81836e-05	-0.0325344	-0.123684	-0.152582	4	6	35537153		TULP1 (-56439)
	cg02540440	1.63023e-09	6.82268e-05	0.289596	0.270999	0.0337178	8	X	39866758		BCOR (+89897)
	cg22004069	1.64378e-09	6.8794e-05	0.188613	0.186466	0.0202806	8	19	5585648		SAFB2 (+37342)
	cg07780544	1.65193e-09	6.91349e-05	-0.183762	-0.211038	0.0291693	5	X	109662214	AMMECR1	AMMECR1 (-100748)
	cg05795109	1.65223e-09	6.91475e-05	-0.147122	-0.445911	-0.0411349	6	3	114958926		GAP43 (-383430)
	cg15239532	1.66213e-09	6.95619e-05	-0.243794	-0.114789	-0.0591931	6	14	51009875	ATL1	MAP4K5 (-10549)
	cg22070544	1.67537e-09	7.01159e-05	-0.033165	0.328825	0.159367	9	14	57277341	OTX2	OTX2 (-155)
	cg00442137	1.70174e-09	7.12197e-05	-0.0853857	-0.243884	-0.102796	6	12	12696129	DUSP16	DUSP16 (+19187)
	cg07609007	1.7145e-09	7.17537e-05	-0.0775872	-0.0872179	-0.102984	4	1	146977303	LINC00624	BCL9 (-35878)
	cg15156528	1.71478e-09	7.17653e-05	-0.225866	-0.246193	-0.0576235	6	12	49583981	TUBA1A	TUBA1A (-875)
	cg18640536	1.72055e-09	7.20066e-05	-0.0541602	-0.16692	-0.145971	2	5	126211060	37681	LMNB1 (+98221)
	cg00306523	1.73909e-09	7.27825e-05	-0.685303	0.0900714	0.0731544	7	8	94257369		TRIQK (-278997)
	cg10322573	1.73914e-09	7.27847e-05	0.376852	0.199722	0.0265845	8	14	89907878	FOXN3	FOXN3 (+177595)
	cg03226114	1.77268e-09	7.41883e-05	-0.0370965	-0.215896	-0.15904	1	17	75798752		TNRC6C (-202384)
	cg07100050	1.78585e-09	7.47397e-05	-0.171577	-0.285084	0.028924	5	10	21390114	NEBL	NEBL (-203584)
	cg17079374	1.79214e-09	7.50027e-05	-0.18462	-0.330179	-0.00171422	6	1	7308012	CAMTA1	CAMTA1 (+462629)
	cg05375811	1.79604e-09	7.51661e-05	-0.0695538	-0.305659	-0.132949	4	12	131506021	GPR133	GPR133 (+67570)
	cg20467957	1.7967e-09	7.51936e-05	0.0697907	0.0820429	0.135839	8	11	31845529		PAX6 (-6021)
	cg18122153	1.79704e-09	7.52079e-05	-0.312989	-0.225662	-0.130395	4	10	116445428	ABLIM1	ABLIM1 (-27372)
	cg22378492	1.80617e-09	7.55899e-05	-0.0650359	-0.278971	-0.0270075	6	19	11202486	LDLR	LDLR (+2449)
	cg18261479	1.80814e-09	7.56726e-05	-0.00621412	-0.13414	-0.154075	1	5	73686061	LINC01331	ENC1 (+251187)
	cg17587553	1.80938e-09	7.57243e-05	-0.019838	-0.156987	-0.17348	4	9	138887768		UBAC1 (-34543)
	cg08826152	1.82108e-09	7.62142e-05	0.0643276	0.100292	0.0467247	8	17	15869607	ADORA2B	ADORA2B (+21377)
	cg01798250	1.83448e-09	7.67749e-05	0.0222973	-0.215092	-0.118807	1	2	134964105		MGAT5 (+86353)
	cg05066835	1.83513e-09	7.68021e-05	-0.0326719	0.120272	0.0988981	9	6	168079635	LOC401286	C6orf123 (+117903)
	cg06521878	1.84162e-09	7.70737e-05	-0.281686	-0.271782	0.00477851	6	9	112629821	PALM2	PALM2 (+87103)
	cg04537362	1.84184e-09	7.70829e-05	-0.00699809	-0.177531	-0.125321	1	11	45070638		PRDM11 (-98255)
	cg14042103	1.85656e-09	7.76989e-05	0.0179338	-0.149188	-0.185736	1	3	148510658		CPB1 (+1770)
	cg11251293	1.85897e-09	7.77998e-05	-0.0593104	-0.121424	-0.161709	4	1	205025861	CNTN2	CNTN2 (+13537)
	cg05979484	1.86354e-09	7.79911e-05	-0.213723	-0.137182	-0.0547304	6	7	55432630	LANCL2	LANCL2 (-510)
	cg26657404	1.87972e-09	7.8668e-05	-0.191227	-0.310923	-0.0359386	6	16	85684821	KIAA0182	GINS2 (+37783)
	cg10619974	1.88074e-09	7.87107e-05	-0.125755	-0.177017	-0.0263279	4	4	42997620	GRXCR1	GRXCR1 (+102337)
	cg00430542	1.8897e-09	7.90858e-05	-0.0438869	0.234724	0.111465	9	16	73098732		ZFHX3 (-16459)
	cg20944706	1.89284e-09	7.92171e-05	0.0330004	-0.204481	-0.173024	1	3	23752284		UBE2E1 (-95109)
	cg14251691	1.89633e-09	7.93635e-05	-0.00771839	-0.256769	-0.187237	4	10	126382387	FAM53B	FAM53B (+50231)
	cg00888336	1.90407e-09	7.96872e-05	-0.0466297	-0.150875	-0.114074	4	16	80654763	CDYL2	DYNLRB2 (+79910)
	cg02464551	1.90857e-09	7.98755e-05	-0.036586	-0.19399	-0.0665545	2	2	232482571		C2orf57 (+24997)
	cg25014247	1.91766e-09	8.02558e-05	0.316139	0.230583	0.0263479	8	12	122015908	KDM2B	KDM2B (+2980)
	cg11040546	1.92269e-09	8.04663e-05	-0.115001	-0.137172	-0.284834	4	1	15653236	FHAD1	EFHD2 (-83154)
	cg09132846	1.92464e-09	8.05483e-05	-0.681593	0.0421312	0.0872828	7	7	142976759		TMEM139 (-5283)
	cg08241477	1.93604e-09	8.1025e-05	0.345375	0.197185	-0.0273583	8	5	92929573	NR2F1	NR2F1 (+10531)
	cg06694446	1.94148e-09	8.12527e-05	-0.118722	-0.118137	-0.034933	6	3	191048753	CCDC50	UTS2B (-429)
	cg06776201	1.95428e-09	8.17886e-05	-0.16049	-0.373997	-0.11539	6	14	73146496	DPF3	DPF3 (+214312)
	cg04012535	1.95823e-09	8.19538e-05	-0.00393333	0.278764	0.0172395	9	1	37176647		CSF3R (-227769)
	cg17927434	1.96247e-09	8.21315e-05	0.0137198	-0.131181	-0.178172	1	9	19629699	SLC24A2	SLC24A2 (+157226)
	cg01371171	1.96393e-09	8.21924e-05	-0.182958	-0.135626	-0.138957	4	1	232454948		SIPA1L2 (+242355)
	cg14351425	1.96618e-09	8.22867e-05	-0.0474267	-0.351759	-0.0302484	3	10	120968739	GRK5	GRK5 (+1639)
	cg24897996	1.98932e-09	8.3255e-05	-0.0979706	-0.33489	-0.0234293	4	2	202937892	KIAA2012	FZD7 (+38583)
	cg08383160	1.99211e-09	8.33718e-05	-0.263169	-0.346425	-0.0747712	6	2	17981519		MSGN1 (-16243)
	cg12232388	2.00027e-09	8.37133e-05	-0.327949	-0.378493	-0.0196102	6	12	125027851		NCOR2 (-48054)
	cg22515121	2.0328e-09	8.50746e-05	-0.13685	-0.215765	0.100922	5	3	195249160	PPP1R2	PPP1R2 (+21048)
	cg09091287	2.03764e-09	8.52772e-05	-0.308409	-0.248177	-0.019726	6	18	75624209		GALR1 (+661705)
	cg27527874	2.0392e-09	8.53426e-05	-0.213955	-0.0894438	-0.0315951	6	6	29571074	GABBR1	OR2H2 (+15392)
	cg16203381	2.03959e-09	8.5359e-05	-0.0157053	0.239379	0.0951471	9	18	55108965	ONECUT2	ONECUT2 (+6049)
	cg19818699	2.04045e-09	8.53949e-05	-0.0672269	-0.239734	-0.107254	4	1	23126727	EPHB2	EPHB2 (+89265)
	cg11706596	2.04185e-09	8.54535e-05	-0.673133	0.0341639	0.104095	7	12	105627153	APPL2	APPL2 (+2707)
	cg17939602	2.05421e-09	8.59707e-05	-0.048619	-0.112027	-0.21362	4	5	40674971		PTGER4 (-4628)
	cg15063687	2.05526e-09	8.60147e-05	-0.120022	-0.160377	-0.0338043	4	1	7359621	CAMTA1	VAMP3 (-471707)
	cg25998745	2.06079e-09	8.6246e-05	-0.0577554	-0.145789	-0.185189	2	8	142028625		PTK2 (-17369)
	cg02000275	2.06368e-09	8.63669e-05	-0.0350636	-0.222115	-0.0489515	6	14	34488059		EGLN3 (-67773)
	cg16856460	2.07082e-09	8.66659e-05	-0.0509288	-0.291057	-0.188743	4	8	141790252	PTK2	AGO2 (-144535)
	cg25722735	2.08254e-09	8.71563e-05	-0.129933	-0.14494	-0.0326039	4	10	116392133	ABLIM1	ABLIM1 (+25923)
	cg13752172	2.10319e-09	8.80206e-05	-0.0235019	-0.0959687	-0.147086	1	9	74728036	GDA	GDA (-36256)
	cg26240411	2.11853e-09	8.86628e-05	-0.235889	-0.273885	-0.0517671	4	10	1518725	ADARB2	ADARB2 (+260944)
	cg23835844	2.12246e-09	8.88273e-05	0.0305716	-0.240735	-0.0946514	1	17	860385	NXN	NXN (+22624)
	cg05718311	2.12928e-09	8.91127e-05	0.00449751	-0.333521	-0.178337	1	10	3846725		KLF6 (-19259)
	cg27511678	2.13353e-09	8.92905e-05	-0.151895	-0.127544	-0.0132879	4	18	48721148	MEX3C	MEX3C (+2541)
	cg16458577	2.13503e-09	8.93529e-05	-0.0397511	-0.179767	-0.304291	4	6	39219365		KCNK5 (-22140)
	cg04900605	2.14415e-09	8.97349e-05	-0.116841	-0.238328	-0.0829295	6	7	138293281	SVOPL	SVOPL (+70542)
	cg01537248	2.14789e-09	8.98914e-05	-0.187268	-0.377373	-0.0565951	6	17	46517641		SKAP1 (-10090)
	cg09829382	2.15105e-09	9.00238e-05	0.228779	0.138202	0.0377071	8	19	3286070	BRUNOL5	CELF5 (+61370)
	cg05992340	2.16024e-09	9.0408e-05	-0.00243136	-0.3646	-0.0312751	2	5	58882243	PDE4D	PDE4D (+307381)
	cg04903269	2.16971e-09	9.08045e-05	-0.062803	-0.394646	-0.071878	3	15	72598763	CELF6	ENSG00000273025 (+13523)
	cg09138315	2.17717e-09	9.11168e-05	-0.0720669	-0.148827	-0.0668028	6	10	73839404	SPOCK2	SPOCK2 (+9126)
	cg06280307	2.18002e-09	9.1236e-05	-0.031688	-0.182374	-0.0632746	4	1	7598094	CAMTA1	VAMP3 (-233234)
	cg08982699	2.18084e-09	9.12703e-05	-0.0769522	-0.378946	-0.0661539	4	15	72598757	CELF6	ENSG00000273025 (+13529)
	cg02481697	2.18387e-09	9.13972e-05	-0.0488901	0.269648	0.141925	9	17	8928012	NTN1	NTN1 (+3154)
	cg01035640	2.19323e-09	9.1789e-05	-0.212078	-0.122806	-0.0568745	6	17	41795679		SOST (+40476)
	cg21958986	2.19572e-09	9.18931e-05	-0.37995	0.017886	-0.126357	4	10	3792239	LOC105376360	KLF6 (+35227)
	cg16075933	2.20826e-09	9.24177e-05	0.0374982	-0.178818	-0.134559	1	1	27890125	AHDC1	AHDC1 (+40017)
	cg03587907	2.2398e-09	9.3738e-05	0.0742422	0.192412	0.102194	8	9	138986185	NACC2	C9orf69 (+24523)
	cg19727499	2.25039e-09	9.41812e-05	0.214268	0.198221	0.0126281	8	19	49628740	PPFIA3	PPFIA3 (+6095)
	cg22081371	2.25044e-09	9.4183e-05	-0.0133493	-0.3293	-0.118914	4	1	177827903		SEC16B (+111146)
	cg25652680	2.25214e-09	9.42544e-05	-0.0896254	-0.0710634	-0.290882	4	6	41194600	TREML4	TREML4 (-1461)
	cg08723158	2.25865e-09	9.4527e-05	0.0545652	-0.268072	-0.176513	1	2	99413513	KIAA1211L	MGAT4A (-70355)
	cg26151999	2.26046e-09	9.46026e-05	-0.0985786	-0.262382	-0.193962	4	19	55644082		PPP1R12C (-15156)
	cg19441834	2.26378e-09	9.47413e-05	0.174205	0.0810132	0.0568943	8	10	103519543		FGF8 (+16172)
	cg07285949	2.28453e-09	9.56098e-05	0.000789519	-0.270306	-0.161499	4	14	100969983	WDR25	BEGAIN (+64423)
	cg19016469	2.28949e-09	9.58175e-05	-0.334864	-0.171353	0.00641607	6	1	58525572	DAB1	OMA1 (+486899)
	cg03064100	2.29764e-09	9.61586e-05	-0.27628	-0.397507	-0.0110621	4	2	46720801		TMEM247 (+14077)
	cg21028488	2.30293e-09	9.63798e-05	-0.0586375	-0.200497	-0.0148117	6	22	35998377		MB (+15125)
	cg10304941	2.35144e-09	9.84103e-05	-0.0939295	-0.213519	-0.0365828	6	1	233249154	PCNXL2	NTPCR (+162785)
	cg20193839	2.36549e-09	9.89982e-05	-0.0010297	0.284637	0.109146	9	8	61834501		CHD7 (+243165)
	cg21292716	2.3718e-09	9.92624e-05	0.0532508	-0.28609	-0.159461	1	12	109220256	SSH1	SSH1 (+31109)
	cg17209468	2.39146e-09	0.000100085	-0.269381	-0.2563	0.0308744	5	5	147995642	HTR4	HTR4 (+38073)
	cg11679503	2.39665e-09	0.000100302	0.0349276	-0.157579	-0.297102	1	10	119776058	RAB11FIP2	RAB11FIP2 (+30055)
	cg07383415	2.39709e-09	0.00010032	-0.044775	-0.341108	-0.00739358	6	2	16845658	FAM49A	FAM49A (+1443)
	cg01454496	2.39739e-09	0.000100333	-0.0188898	-0.253502	-0.181093	4	14	100969992	WDR25	BEGAIN (+64414)
	cg02138322	2.42204e-09	0.000101365	0.0609609	-0.133902	-0.177911	1	16	15601419	C16orf45	C16orf45 (+73268)
	cg22661913	2.45341e-09	0.000102678	-0.149712	-0.139701	-0.114989	4	1	233009319		MAP10 (+68677)
	cg00610692	2.46375e-09	0.00010311	0.0467834	0.143568	0.039879	8	2	74668072	RTKN	RTKN (+953)
	cg04208329	2.46999e-09	0.000103372	-0.239972	-0.0231834	-0.101661	4	14	75445376		PGF (-22890)
	cg18210365	2.48663e-09	0.000104068	0.243467	0.0407849	0.0692418	8	15	65066710	RBPMS2	RBPMS2 (+1075)
	cg25735823	2.51035e-09	0.000105061	-0.172811	-0.450387	-0.0215931	6	2	3261367	TSSC1	TRAPPC12 (-122089)
	cg18973247	2.51661e-09	0.000105323	-0.113808	-0.252763	0.0693497	5	1	27070873	ARID1A	PIGV (-43812)
	cg06520331	2.52086e-09	0.000105501	-0.1383	-0.231864	0.0113935	5	10	93171002	LOC100188947	HECTD2 (+901)
	cg04521333	2.52143e-09	0.000105525	0.201143	0.110093	0.0819401	8	11	31819148	PAX6	PAX6 (+20360)
	cg07157107	2.54046e-09	0.000106321	-0.0389811	-0.255755	-0.0475507	6	8	42623730	CHRNA6	CHRNA6 (+198)
	cg18068443	2.54605e-09	0.000106555	0.15294	0.213927	0.0313838	8	11	69812114		ANO1 (-112293)
	cg25460807	2.5634e-09	0.000107281	-0.0371182	0.191684	0.0979143	9	8	21908022		FGF17 (+8086)
	cg05683937	2.56568e-09	0.000107376	0.0443783	-0.237205	-0.250112	1	7	142512900		EPHB6 (-39891)
	cg03095344	2.58119e-09	0.000108025	-0.220941	-0.391534	-0.0646367	6	9	132891470	GPR107	NCS1 (-43386)
	cg22885525	2.58523e-09	0.000108195	0.190771	0.139712	0.126661	8	1	156661832		CRABP2 (+13560)
	cg13153978	2.59832e-09	0.000108742	-0.354623	-0.245462	-0.0451085	6	8	101960854	YWHAZ	YWHAZ (+4356)
	cg14161440	2.60128e-09	0.000108866	-0.176177	-0.41072	-0.0889053	6	3	64136807	PRICKLE2	PRICKLE2 (+74323)
	cg09042966	2.60132e-09	0.000108868	0.171544	0.238399	0.0746109	8	13	103840341		SLC10A2 (-121146)
	cg10056924	2.60766e-09	0.000109133	-0.0814048	-0.386036	0.0570626	5	12	108454072		WSCD2 (-71455)
	cg23038594	2.61117e-09	0.00010928	-0.178559	-0.291864	-0.051596	4	1	170254369	LOC284688	METTL11B (+139228)
	cg02189883	2.61949e-09	0.000109628	-0.0363141	-0.330215	-0.148849	3	8	141790392	PTK2	AGO2 (-144675)
	cg13283691	2.62033e-09	0.000109664	-0.29012	-0.220568	0.00159404	6	2	197852904		PGAP1 (-61450)
	cg04237250	2.62727e-09	0.000109954	-0.0848619	-0.0591459	-0.159821	4	2	178437347		TTC30B (-19606)
	cg06265273	2.63483e-09	0.00011027	-0.173766	-0.248385	-0.0378495	6	8	10802400	XKR6	PINX1 (-105015)
	cg11921539	2.63858e-09	0.000110427	-0.168198	-0.0767353	-0.0409338	6	11	116328665		BUD13 (+315038)
	cg14709253	2.64512e-09	0.000110701	-0.0646361	-0.272702	-0.103092	6	8	17519419	MTUS1	PDGFRL (+85478)
	cg14678774	2.64998e-09	0.000110904	0.395001	0.251372	-0.0169117	8	19	12978360	MAST1	DNASE2 (+13921)
	cg15131616	2.65153e-09	0.000110969	-0.438917	-0.167626	0.0127025	6	5	5271951	ADAMTS16	ADAMTS16 (+131509)
	cg00755063	2.65468e-09	0.000111101	0.0276851	0.223817	0.0482102	8	19	13275288		IER2 (+12500)
	cg08954249	2.65865e-09	0.000111267	-0.123241	-0.196102	-0.187686	4	1	32247625		BAI2 (-17990)
	cg23365739	2.66288e-09	0.000111444	0.0057543	0.301247	0.128063	8	14	57277178	OTX2	OTX2 (+8)
	cg10523105	2.66331e-09	0.000111462	0.00724662	-0.354343	-0.0165839	3	14	74178976	PNMA1	PNMA1 (+2151)
	cg04017244	2.66785e-09	0.000111652	-0.184512	-0.351953	-0.0910681	4	X	128768933		APLN (+19999)
	cg23815330	2.6705e-09	0.000111763	-0.030212	0.130829	0.112948	9	2	223413982	SGPP2	FARSB (+107073)
	cg03793951	2.67218e-09	0.000111834	-0.0339548	-0.198239	-0.158055	4	10	134856499		GPR123 (-44909)
	cg16797751	2.67335e-09	0.000111882	-0.0306388	-0.172384	-0.113173	4	7	105290218	ATXN7L1	EFCAB10 (-68276)
	cg23079098	2.69733e-09	0.000112886	-0.187087	-0.188421	-0.112578	6	9	129313516		LMX1B (-63205)
	cg19635875	2.70286e-09	0.000113117	0.0158533	-0.199745	-0.131039	1	5	170030195	KCNIP1	KCNIP1 (+98619)
	cg12626166	2.70877e-09	0.000113365	-0.176175	-0.128199	-0.095248	4	20	50332000	ATP9A	ATP9A (+53172)
	cg09459581	2.7193e-09	0.000113806	-0.381019	-0.182033	-0.0693371	6	2	173685275	RAPGEF4	RAPGEF4 (+84707)
	cg06250135	2.72796e-09	0.000114168	-0.000621776	-0.101808	-0.0695556	1	8	26481822	DPYSL2	DPYSL2 (+46464)
	cg27586655	2.74229e-09	0.000114767	-0.262891	-0.207053	-0.0744	4	5	168313406	SLIT3	PANK3 (-306802)
	cg03145583	2.74641e-09	0.00011494	-0.0474088	-0.101082	-0.0296989	6	3	75552034		FRG2C (-161446)
	cg19775086	2.74737e-09	0.00011498	-0.204153	-0.219924	0.0206756	5	20	47065595		PREX1 (+378824)
	cg01213381	2.74775e-09	0.000114996	-0.0397307	0.17738	0.132876	9	14	57277761	OTX2	OTX2 (-575)
	cg00370962	2.74934e-09	0.000115063	0.0210549	-0.206976	-0.142074	1	3	17199496	TBC1D5	PLCL2 (+273045)
	cg03697173	2.75546e-09	0.000115319	-0.117479	-0.236529	-0.0549492	4	7	4877433	RADIL	PAPOLB (+24191)
	cg18456003	2.76892e-09	0.000115882	-0.164507	-0.0561839	-0.138941	4	5	107018173		EFNA5 (-11578)
	cg11405200	2.77397e-09	0.000116093	-0.00130643	0.0993669	0.0801135	9	6	14212128		CD83 (+94257)
	cg24649967	2.78785e-09	0.000116674	-0.0191331	-0.177328	-0.148878	2	11	82708597	RAB30	RAB30 (+74310)
	cg04837616	2.79036e-09	0.00011678	-0.148455	-0.26822	-0.0958287	4	17	75880542	FLJ45079	TNRC6C (-120594)
	cg14914532	2.79545e-09	0.000116992	-0.1235	-0.368591	0.0261489	5	12	1947412	CACNA2D4	LRTM2 (+17980)
	cg10625670	2.79576e-09	0.000117005	0.365799	0.152323	0.00184247	8	6	121752575		GJA1 (-4262)
	cg13180566	2.80361e-09	0.000117334	-0.135566	-0.218044	-0.0493443	4	4	1052158		FGFRL1 (+48392)
	cg15978967	2.81137e-09	0.000117658	-0.152065	-0.30214	-0.0882554	6	17	17288954		NT5M (+82306)
	cg09993970	2.8133e-09	0.000117739	-0.468222	-0.237597	-0.0313138	6	1	154748379	KCNN3	KCNN3 (+94376)
	cg13321399	2.81852e-09	0.000117958	-0.368035	-0.168934	-0.0865155	4	12	131505834	GPR133	GPR133 (+67383)
	cg19425332	2.82882e-09	0.000118389	-0.0189391	0.111063	0.074037	9	10	118898869	VAX1	VAX1 (-1303)
	cg25961136	2.86533e-09	0.000119917	-0.0795996	0.1151	0.102374	9	12	58246871		CTDSP2 (-6350)
	cg10053507	2.87665e-09	0.000120391	-0.359044	-0.196729	-0.0616716	6	1	15307522	KIAA1026	TMEM51 (-171505)
	cg02202411	2.88225e-09	0.000120625	-0.218861	-0.336663	0.07448	5	5	6338418	FLJ33360	MED10 (+40288)
	cg17291189	2.90472e-09	0.000121566	-0.133671	-0.131973	-0.0491367	6	12	8000417	SLC2A14	SLC2A14 (+25002)
	cg16592136	2.91019e-09	0.000121794	-0.129802	-0.129726	-0.00402436	6	6	144163834	LTV1	LTV1 (-646)
	cg11195298	2.91705e-09	0.000122081	-0.492989	0.017765	0.110516	7	15	93630456	RGMA	RGMA (-13365)
	cg26804244	2.92264e-09	0.000122316	0.016797	-0.419834	-0.0417864	1	2	177454770		MTX2 (+320624)
	cg09975259	2.92702e-09	0.000122499	-0.0496116	-0.237107	-0.0509171	6	1	21947340	RAP1GAP	RAP1GAP (+31007)
	cg01122302	2.97357e-09	0.000124447	-0.00896161	0.126932	0.168959	9	17	42392668	RUNDC3A	RUNDC3A (+6742)
	cg18766033	2.97736e-09	0.000124605	0.483513	0.166278	-0.044576	8	5	73729290		ENC1 (+207958)
	cg20019410	2.9859e-09	0.000124963	0.0165585	-0.248016	-0.278907	1	2	207939050		KLF7 (+91618)
	cg15772157	2.99308e-09	0.000125264	0.0565471	0.204509	0.0428732	8	10	22766320		SPAG6 (+131922)
	cg04584781	3.00228e-09	0.000125648	0.0726893	0.163404	0.0845078	8	17	38348058	RAPGEFL1	RAPGEFL1 (+13817)
	cg01263942	3.00574e-09	0.000125793	0.0226839	-0.171021	-0.109741	1	10	695859	DIP2C	DIP2C (+39746)
	cg04196933	3.01542e-09	0.000126198	-0.0399356	-0.118858	-0.101717	2	5	178195556	AACSL	ZNF354A (-37854)
	cg00151370	3.02067e-09	0.000126418	-0.205856	-0.111152	-0.130816	4	6	16323285	ATXN1	GMPR (+84475)
	cg12997157	3.06615e-09	0.000128322	-0.0155893	-0.237589	-0.161669	2	5	149670038	CAMK2A	CAMK2A (-847)
	cg02377544	3.07378e-09	0.000128641	0.11652	0.191445	-0.0414364	8	15	37388359	MEIS2	MEIS2 (+3726)
	cg11642283	3.08022e-09	0.00012891	-0.187456	-0.152165	0.0234084	5	11	116929864	SIK3	SIK3 (+39128)
	cg11499323	3.08975e-09	0.000129309	-0.0827843	-0.265218	-0.0583954	4	11	45114907	PRDM11	PRDM11 (-53986)
	cg24448171	3.09566e-09	0.000129556	-0.139657	-0.379836	-0.0450874	6	15	31597352		KLF13 (-21705)
	cg07012832	3.10763e-09	0.000130057	0.0312075	-0.173049	-0.135453	1	1	22978556	C1QB	C1QB (-1125)
	cg16392442	3.12121e-09	0.000130626	-0.268818	-0.16003	-0.017997	6	12	49595954		TUBA1A (-12848)
	cg24596898	3.12407e-09	0.000130746	-0.0248635	0.240405	0.0815937	9	1	41849189		FOXO6 (+21596)
	cg08520443	3.13497e-09	0.000131201	-0.0153211	-0.098298	-0.128649	4	17	746641	NXN	GLOD4 (-61061)
	cg17679542	3.14568e-09	0.00013165	-0.12376	-0.295757	-0.183043	4	5	946316		BRD9 (-53378)
	cg26645069	3.14917e-09	0.000131796	-0.03235	-0.223025	-0.0213573	5	12	6861493	MLF2	MLF2 (+1227)
	cg24935521	3.15212e-09	0.000131919	0.375951	0.157906	-0.0509356	8	X	132574397		GPC4 (-24880)
	cg04056782	3.17113e-09	0.000132715	-0.167715	-0.162104	-0.0123405	4	7	98735131	SMURF1	SMURF1 (+6591)
	cg10286380	3.18334e-09	0.000133226	0.0507566	0.170391	0.0148368	8	19	51171847	SHANK1	SYT3 (-30546)
	cg10354730	3.19426e-09	0.000133683	0.0287563	-0.255011	-0.0135925	3	16	357249	AXIN1	PDIA2 (+24098)
	cg25944537	3.19962e-09	0.000133907	-0.267217	-0.123703	-0.024396	4	11	3533461	LOC101927708	ART5 (+130023)
	cg13584383	3.20847e-09	0.000134278	0.250611	0.17693	-0.0314477	8	17	77808014	CBX4	CBX4 (+5213)
	cg10219742	3.21559e-09	0.000134575	-0.231343	-0.232687	-0.0320847	6	8	144144922		ENSG00000261667 (-16951)
	cg19378416	3.21698e-09	0.000134634	0.133221	0.313419	0.112719	8	17	80372775	C17orf101	HEXDC (-3418)
	cg23019096	3.21826e-09	0.000134687	-0.127338	-0.270428	-0.00605898	6	17	68086025	KCNJ16	KCNJ16 (-14969)
	cg24653772	3.22939e-09	0.000135153	-0.0260066	-0.119691	-0.19236	1	7	788989	HEATR2	HEATR2 (+22652)
	cg07816520	3.23419e-09	0.000135354	-0.0571909	-0.202293	-0.1531	4	19	14524869	DDX39A	DDX39A (+5309)
	cg15725182	3.25595e-09	0.000136265	0.0342784	0.150389	0.0450326	8	5	167727679	WWC1	WWC1 (+8525)
	cg03883331	3.29471e-09	0.000137887	-0.719891	0.135403	0.0281868	7	1	244217328	ZNF238	ZBTB18 (+2744)
	cg09661041	3.29755e-09	0.000138006	-0.0558752	-0.166398	-0.0422014	4	X	153141905	L1CAM	L1CAM (+9694)
	cg23401796	3.31182e-09	0.000138603	-0.0865794	-0.534373	-0.0783304	6	8	141248667	TRAPPC9	TRAPPC9 (+220010)
	cg22989251	3.33355e-09	0.000139512	0.00632217	-0.149653	-0.0511402	1	1	41841698	FOXO6	FOXO6 (+14105)
	cg05657132	3.34265e-09	0.000139893	-0.291842	-0.302542	-0.037961	6	2	207999053	KLF7	KLF7 (+31615)
	cg02415431	3.36244e-09	0.000140721	-0.0318394	-0.285091	-0.151549	1	22	23923255	IGLL1	IGLL1 (-761)
	cg15414028	3.36729e-09	0.000140924	-0.0343655	-0.419665	0.01007	5	10	14644188	FAM107B	CDNF (+235882)
	cg11373903	3.3845e-09	0.000141645	-0.309182	-0.168866	-0.0256873	6	11	99241720	CNTN5	CNTN5 (+349801)
	cg04236639	3.39017e-09	0.000141882	0.196674	0.153855	-0.0210426	8	21	34402565		OLIG2 (+4323)
	cg12978167	3.39023e-09	0.000141885	-0.0791246	-0.260094	-0.0751759	6	9	84459145		SPATA31D1 (-144541)
	cg26856023	3.40776e-09	0.000142618	-0.115098	-0.266932	-0.0558985	4	19	3034758	TLE2	TLE2 (-5594)
	cg17865528	3.41406e-09	0.000142882	-0.291779	-0.253791	-0.025742	6	5	138210634	CTNNA1	LRRTM2 (+344)
	cg19256474	3.41613e-09	0.000142968	-0.075565	-0.18029	-0.118123	2	7	1435165		MICALL2 (+63972)
	cg19284277	3.41893e-09	0.000143085	0.170984	0.206932	0.0469816	8	17	80190054	SLC16A3	SLC16A3 (-1508)
	cg03489437	3.42154e-09	0.000143195	-0.121052	-0.369838	-0.0462105	6	2	217561701	IGFBP5	IGFBP5 (-1454)
	cg03394579	3.42502e-09	0.00014334	-0.23282	-0.263541	-0.0203339	6	14	32694400		AKAP6 (-104078)
	cg17907520	3.45039e-09	0.000144402	0.0237493	-0.154358	-0.146882	1	15	31680189		KLF13 (+61132)
	cg03676485	3.45325e-09	0.000144522	-0.0148149	0.10716	0.0861885	9	7	2563816	LFNG	LFNG (+4341)
	cg00446839	3.4664e-09	0.000145072	0.0374656	-0.340913	-0.149672	1	20	52367627		ZNF217 (-157250)
	cg21790461	3.46644e-09	0.000145074	-0.128151	-0.193297	-0.215572	2	4	1376261	KIAA1530	CRIPAK (-9078)
	cg12393166	3.47004e-09	0.000145225	-0.152086	-0.36058	0.077335	5	12	55387128		TESPA1 (-8673)
	cg02859421	3.47403e-09	0.000145392	0.128007	0.401598	0.123105	8	19	3465071		C19orf77 (+15468)
	cg02577773	3.47726e-09	0.000145527	0.0292087	-0.226457	-0.0218628	1	2	208027870	KLF7	KLF7 (+2798)
	cg09447225	3.48647e-09	0.000145912	-0.237371	-0.344619	-0.0658279	4	12	101099971		ANO4 (-88613)
	cg07132814	3.49776e-09	0.000146385	-0.137776	-0.596564	0.0115435	6	16	70726064	VAC14	MTSS1L (-6096)
	cg20216803	3.50023e-09	0.000146488	-0.0189719	-0.231274	-0.204369	1	4	24887150	CCDC149	SOD3 (+90066)
	cg05986684	3.50175e-09	0.000146552	-0.100533	-0.203399	-0.0946169	4	2	153618725		PRPF40A (-44231)
	cg09829755	3.50573e-09	0.000146718	-0.0946547	-0.366021	0.00666554	6	11	66717718	PC	PC (+8128)
	cg08972794	3.51247e-09	0.000147	-0.0226428	-0.15652	-0.287587	1	2	236953939	AGAP1	GBX2 (+123072)
	cg09777062	3.53095e-09	0.000147774	-0.034335	-0.156693	-0.156941	2	4	4845490	LINC01396	MSX1 (-15902)
	cg07764200	3.53613e-09	0.000147991	-0.185176	-0.228913	-0.0658093	6	2	28939458		PPP1CB (-35260)
	cg10528812	3.53653e-09	0.000148007	-0.13567	-0.149141	0.0242276	5	1	155699019	DAP3	DAP3 (+40171)
	cg17588371	3.54715e-09	0.000148452	-0.0283017	0.168444	0.108459	9	5	92922799	NR2F1	NR2F1 (+3757)
	cg25646780	3.57857e-09	0.000149767	-0.0931212	-0.1905	-0.0419904	4	11	118977379	C2CD2L	C2CD2L (-713)
	cg26841170	3.57981e-09	0.000149819	-0.0766119	-0.284696	0.00384046	6	5	68326758		SLC30A5 (-62714)
	cg19351603	3.59693e-09	0.000150535	0.0624865	0.178027	0.0661536	8	19	45943663		ERCC1 (-16840)
	cg09084256	3.63151e-09	0.000151983	-0.0882223	-0.16035	-0.0586586	4	22	32555286	C22orf42	RFPL2 (+44177)
	cg24073452	3.63565e-09	0.000152155	0.0540254	-0.186532	-0.157176	1	2	236987322	AGAP1	GBX2 (+89689)
	cg13807886	3.64487e-09	0.000152541	0.0127333	-0.148153	-0.138628	1	10	1441722	ADARB2	ADARB2 (+337947)
	cg20539142	3.64775e-09	0.000152662	-0.041431	-0.216178	-0.0850041	2	8	42623718	CHRNA6	CHRNA6 (+210)
	cg00313957	3.64865e-09	0.0001527	-0.0369319	-0.242226	-0.0392502	6	5	38720409	LINC01265	LIFR (-124904)
	cg16176744	3.65463e-09	0.00015295	-0.0375896	0.217556	0.119028	9	2	54787681	SPTBN1	SPTBN1 (+104260)
	cg16181461	3.66421e-09	0.000153351	-0.0972734	-0.178665	-0.0282564	4	8	20056211	ATP6V1B2	ATP6V1B2 (+1334)
	cg07017153	3.67389e-09	0.000153756	-0.0698003	0.214332	0.0432249	9	17	47100007	IGF2BP1	IGF2BP1 (+25234)
	cg26062981	3.69702e-09	0.000154724	0.0558748	-0.130612	-0.155586	1	22	38452295	PICK1	PICK1 (-911)
	cg12749636	3.70875e-09	0.000155215	-0.0169543	0.0956236	0.0437081	9	1	26126442	SEPN1	SEPN1 (-224)
	cg15146077	3.71238e-09	0.000155367	-0.0600894	-0.111646	-0.239281	4	7	78638285	MAGI2-AS2	MAGI2 (+444604)
	cg09805172	3.71314e-09	0.000155399	-0.107533	-0.347633	-0.0926936	6	13	36785935	SOHLH2	DCLK1 (-80493)
	cg01040727	3.71665e-09	0.000155546	-0.0838746	-0.120464	-0.181077	2	16	73321934		ZFHX3 (-239661)
	cg00568907	3.71774e-09	0.000155591	-0.219978	-0.257289	-0.0483145	4	19	18740236		KLHL26 (-7538)
	cg25920064	3.72111e-09	0.000155732	0.142458	0.111844	0.0716789	8	1	18807226	KLHDC7A	KLHDC7A (-197)
	cg14818812	3.77104e-09	0.000157822	0.118688	0.175962	0.0448035	8	8	142362180		GPR20 (+15186)
	cg26998537	3.77173e-09	0.000157851	-0.0161749	0.246317	0.150227	9	14	57277366	OTX2	OTX2 (-180)
	cg14859916	3.7877e-09	0.000158519	-0.251839	-0.264856	-0.0236149	4	7	148093218	CNTNAP2	CUL1 (-302785)
	cg24550880	3.78911e-09	0.000158578	-0.0952574	-0.235089	-0.0172545	4	17	79420279	BAHCC1	ACTG1 (+59527)
	cg09745833	3.79262e-09	0.000158725	-0.271689	-0.12385	-0.0322588	6	1	176042814	RFWD2	RFWD2 (+133814)
	cg19753896	3.80713e-09	0.000159332	-0.0875279	-0.444615	0.0315769	6	7	141161456	TMEM178B	AGK (-89532)
	cg13027371	3.809e-09	0.000159411	-0.0380775	-0.261082	-0.0434739	4	1	22853796	ZBTB40	EPHA8 (-36260)
	cg21842959	3.8144e-09	0.000159637	-0.270971	-0.32502	0.0336871	5	2	3260677	TSSC1	TRAPPC12 (-122779)
	cg06720823	3.8196e-09	0.000159854	-0.445596	-0.0492196	-0.0442958	4	12	97399497		NEDD1 (+98254)
	cg27224881	3.82828e-09	0.000160217	0.0663208	0.175065	0.0182326	8	15	33191698	FMN1	FMN1 (+168386)
	cg14689515	3.8368e-09	0.000160574	0.00706354	-0.353606	-0.0820635	3	3	39190648	CSRNP1	CSRNP1 (+4417)
	cg12984893	3.83873e-09	0.000160654	-0.169035	-0.339554	0.0135784	6	10	134353627	INPP5A	INPP5A (+2304)
	cg03496533	3.83908e-09	0.000160669	0.196069	0.150325	0.0265566	8	17	46035183	PRR15L	CDK5RAP3 (-13223)
	cg25968713	3.84671e-09	0.000160989	-0.156442	-0.280209	-0.0068959	6	17	46510665		SKAP1 (-3114)
	cg09545123	3.85034e-09	0.000161141	0.00274771	0.240385	0.0588956	9	19	46142357	MIR330	EML2 (+6529)
	cg00158600	3.86099e-09	0.000161586	-0.136216	-0.156284	-0.134588	4	20	36540289	VSTM2L	VSTM2L (+8784)
	cg05384450	3.86821e-09	0.000161888	0.147045	0.182202	0.0520478	8	17	77807475	CBX4	CBX4 (+5752)
	cg20627652	3.90369e-09	0.000163373	-0.324971	-0.19585	-0.0161211	4	17	57484425		YPEL2 (+75363)
	cg08880115	3.90429e-09	0.000163398	-0.0501107	0.37002	0.108699	9	6	108481559		NR2E1 (-5702)
	cg03183820	3.9126e-09	0.000163746	0.0295087	-0.136376	-0.199677	1	1	204829172	NFASC	NFASC (+31391)
	cg14879153	3.92339e-09	0.000164198	-0.323175	-0.111949	-0.0470053	6	4	185459316		IRF2 (-63583)
	cg19878479	3.9487e-09	0.000165257	-0.0632809	-0.278902	-0.113914	2	19	49015582	LMTK3	LMTK3 (+863)
	cg00674807	3.96245e-09	0.000165833	-0.117316	-0.0708479	-0.147376	2	16	81254407	PKD1L2	BCMO1 (-17645)
	cg15244327	3.96769e-09	0.000166052	0.240103	0.134545	-0.0420102	8	8	23021690	TNFRSF10D	TNFRSF10D (-148)
	cg05542681	3.97133e-09	0.000166204	0.072052	0.44753	0.115323	8	16	744328	FBXL16	WDR24 (-3929)
	cg10264791	3.97672e-09	0.00016643	-0.0986547	-0.250837	-0.00979824	5	14	104800976		C14orf144 (+90436)
	cg18205777	4.00902e-09	0.000167781	-0.0527779	-0.184272	-0.0629579	4	1	18475898	IGSF21	IGSF21 (+41659)
	cg09095403	4.01072e-09	0.000167853	-0.0712885	-0.18095	-0.139356	4	22	26859981	HPS4	HPS4 (+19796)
	cg19266014	4.02093e-09	0.00016828	-0.0327428	-0.303699	-0.0766182	4	7	2183958	MAD1L1	MAD1L1 (+88919)
	cg19016694	4.02742e-09	0.000168552	-0.0421484	-0.306704	-0.132914	1	17	80821826	TBCD	ZNF750 (-23373)
	cg20002209	4.03067e-09	0.000168688	-0.0105834	-0.143825	-0.213588	1	16	3004363		KREMEN2 (-9581)
	cg09209794	4.03502e-09	0.00016887	-0.194892	-0.268045	0.118943	5	1	226052137	TMEM63A	TMEM63A (+17931)
	cg00114132	4.04627e-09	0.00016934	-0.0222297	-0.272984	-0.115467	4	18	8657945		RAB12 (+48503)
	cg05307957	4.06786e-09	0.000170244	-0.0526108	-0.301807	-0.0574651	2	1	27028974	ARID1A	ARID1A (+6451)
	cg04834204	4.07008e-09	0.000170337	0.0242514	-0.433347	-0.0623179	1	2	69423553	ANTXR1	ANTXR1 (+183244)
	cg10916429	4.08268e-09	0.000170864	-0.244388	-0.366657	-0.120481	4	15	64799784	ZNF609	ZNF609 (+8294)
	cg12152338	4.10121e-09	0.00017164	-0.077686	-0.151179	-0.268558	2	11	36119923	LDLRAD3	LDLRAD3 (+154296)
	cg11067786	4.12039e-09	0.000172442	0.0703558	0.107066	0.144564	8	2	74780467	LOXL3	LOXL3 (+594)
	cg18785787	4.12195e-09	0.000172508	-0.0538553	-0.329867	-0.11518	2	1	164750253	PBX1	PBX1 (+221382)
	cg19128140	4.12483e-09	0.000172628	-0.064878	-0.164555	-0.0412299	2	16	70974045	HYDIN	VAC14 (-138982)
	cg08576856	4.1308e-09	0.000172878	-0.020159	-0.338522	0.0232211	5	1	96700043		PTBP2 (-487334)
	cg08632388	4.15713e-09	0.00017398	0.0154381	0.240093	0.0786926	8	16	88700818		IL17C (-4182)
	cg04962480	4.1777e-09	0.000174841	-0.235784	-0.224766	-0.0172403	6	8	101962118	YWHAZ	YWHAZ (+3092)
	cg27540189	4.1925e-09	0.00017546	-0.186646	-0.201681	-0.0794452	4	1	16819659	CROCCL2	NECAP2 (+52429)
	cg04573845	4.21255e-09	0.000176299	-0.0135667	0.176786	0.0443092	9	6	14785321		JARID2 (-461205)
	cg01282504	4.2207e-09	0.00017664	0.0484972	0.183006	0.0365579	8	17	171064	RPH3AL	RPH3AL (+31533)
	cg00980287	4.23446e-09	0.000177217	0.131136	0.135205	0.157058	8	5	67483621		PIK3R1 (-27926)
	cg22342922	4.26128e-09	0.000178339	-0.0142803	-0.168601	-0.106258	4	8	118158694	SLC30A8	SLC30A8 (+11128)
	cg05879394	4.26179e-09	0.00017836	-0.0721689	-0.167114	-0.17976	2	8	126591840		TRIB1 (+149278)
	cg09655423	4.27259e-09	0.000178812	-0.109261	-0.243583	0.0318328	5	17	79365257		TMEM105 (-60784)
	cg01052699	4.29619e-09	0.0001798	-0.301796	-0.282577	-0.0656057	4	4	171030995		AADAT (-19878)
	cg05588228	4.29735e-09	0.000179848	-0.0457501	-0.124325	-0.155143	2	5	145132641		PRELID2 (+82225)
	cg08496523	4.32295e-09	0.00018092	-0.375008	-0.280327	-0.056228	6	11	61541027	C11orf9	TMEM258 (+19054)
	cg02237208	4.32832e-09	0.000181145	-0.113758	-0.305616	-0.152501	4	1	2250525		RER1 (-72746)
	cg10140240	4.33064e-09	0.000181242	0.0242025	-0.143392	-0.212219	1	17	76220672	BIRC5	TMEM235 (-7311)
	cg02932167	4.34595e-09	0.000181882	0.0612354	0.17081	0.0325603	8	2	233352951	ECEL1	ECEL1 (-414)
	cg16964733	4.35507e-09	0.000182264	0.0970424	-0.112781	-0.21215	1	12	126003710	TMEM132B	TMEM132B (+192549)
	cg12935350	4.37375e-09	0.000183046	-0.0535319	-0.364855	-0.138574	4	2	105697777	MRPS9	MRPS9 (+43337)
	cg19324978	4.42161e-09	0.000185049	-0.0172293	-0.246258	-0.227027	2	7	2759739		AMZ1 (+40584)
	cg06892898	4.43198e-09	0.000185483	0.0872087	-0.376002	-0.117315	1	7	37024713	ELMO1	AOAH (-260561)
	cg12198140	4.43226e-09	0.000185495	-0.0427737	-0.101262	-0.260472	1	3	16843387		PLCL2 (-83064)
	cg03171937	4.43521e-09	0.000185618	-0.0452746	-0.171587	-0.147185	2	20	51999201	TSHZ2	ZNF217 (+211176)
	cg26326746	4.49489e-09	0.000188116	0.0635212	-0.257053	-0.134652	1	X	139006401	MIR505	CXorf66 (+41277)
	cg11251470	4.50068e-09	0.000188358	-0.0718798	-0.162328	-0.198054	4	7	30008931	SCRN1	SCRN1 (+20973)
	cg21396595	4.50735e-09	0.000188637	-0.0294868	-0.324781	-0.259291	4	17	79405285	BAHCC1	ACTG1 (+74521)
	cg06336581	4.51015e-09	0.000188754	-0.225899	-0.320459	-0.0322574	6	1	55258463	TTC22	C1orf177 (-13311)
	cg17424452	4.5121e-09	0.000188836	-0.0136718	0.195557	0.0711476	9	2	45165499		SIX3 (-3402)
	cg03737262	4.54097e-09	0.000190044	-0.00975176	-0.174357	-0.170677	2	3	124769491	HEG1	HEG1 (+5310)
	cg17153138	4.54724e-09	0.000190307	-0.00220852	-0.376487	-0.060204	4	6	130005350	ARHGAP18	ARHGAP18 (+26019)
	cg24243629	4.55417e-09	0.000190596	-0.315498	-0.157614	0.0154474	6	18	56532628	ZNF532	ZNF532 (+2797)
	cg21002456	4.56605e-09	0.000191094	-0.369124	-0.264618	-0.0669702	4	17	76899694	CEP295NL	ENSG00000178404 (-412)
	cg02986585	4.58292e-09	0.0001918	0.02739	0.157474	0.104204	9	6	41546546	FOXP4	FOXP4 (+32383)
	cg03975644	4.5982e-09	0.000192439	-0.0801529	-0.364168	-0.0833231	2	12	49596002		TUBA1A (-12896)
	cg03341937	4.60022e-09	0.000192524	-0.0574979	-0.159848	-0.307057	2	10	79745423	POLR3A	POLR3A (+43879)
	cg12437258	4.60529e-09	0.000192736	-0.373391	-0.305368	-0.00592769	6	11	36294967	COMMD9	COMMD9 (+16011)
	cg02138557	4.60568e-09	0.000192752	0.116835	0.330635	0.104801	8	22	27876822		MN1 (+320663)
	cg19253850	4.6057e-09	0.000192753	-0.0471991	-0.342771	-0.0690586	4	10	129796229	PTPRE	PTPRE (+90905)
	cg03278527	4.65453e-09	0.000194797	0.028043	-0.158603	-0.104697	1	11	114655280		NXPE2 (+106173)
	cg26385126	4.66139e-09	0.000195084	-0.223687	-0.262007	-0.0543434	6	12	124912021	NCOR2	NCOR2 (+67776)
	cg15530474	4.66921e-09	0.000195411	-0.089909	-0.2174	-0.120444	4	14	99696161	BCL11B	BCL11B (+41403)
	cg01090020	4.67888e-09	0.000195816	0.00790078	-0.169441	-0.165865	1	5	14415593	TRIO	FAM105B (-249263)
	cg07271757	4.6901e-09	0.000196285	-0.153609	-0.158871	-0.0432779	6	10	135127558		ZNF511 (+5580)
	cg11131549	4.692e-09	0.000196365	0.215711	0.100163	0.00452832	8	1	211500852	TRAF5	TRAF5 (+674)
	cg27185152	4.69715e-09	0.00019658	-0.143968	-0.282495	-0.179115	4	7	36829993		AOAH (-65841)
	cg04035233	4.72283e-09	0.000197655	-0.20697	-0.128924	-0.0493261	2	X	102775367	RAB40A	RAB40A (-17565)
	cg10110267	4.73194e-09	0.000198036	-0.20668	-0.136684	0.0442369	5	9	134675988		RAPGEF1 (-90760)
	cg17352769	4.73395e-09	0.000198121	-0.0361918	-0.194382	-0.235687	4	5	7412590	ADCY2	ADCY2 (+16270)
	cg02489327	4.73408e-09	0.000198126	-0.0128605	-0.139878	-0.115523	2	20	626772		SRXN1 (+7241)
	cg00773770	4.73822e-09	0.000198299	-0.0309701	-0.273709	-0.0672824	4	10	30990760	SVILP1	LYZL2 (-72070)
	cg05030553	4.73977e-09	0.000198364	-0.220097	-0.382645	-0.0258441	4	21	44061403		PDE9A (-12461)
	cg05090351	4.74723e-09	0.000198676	0.0560719	0.148869	0.0256726	8	10	126851162		CTBP2 (-134704)
	cg23133513	4.74733e-09	0.000198681	-0.0244594	-0.167273	-0.120679	4	5	172149393		DUSP1 (+48804)
	cg09419063	4.7604e-09	0.000199228	-0.16841	-0.279477	0.00227191	6	22	41048213		MKL1 (-15525)
	cg05052182	4.76688e-09	0.000199499	-0.0297812	-0.370979	-0.0792421	3	1	20078808	TMCO4	TMCO4 (+47601)
	cg03940650	4.78263e-09	0.000200158	-0.116222	-0.114128	-0.185908	4	1	230312724	GALNT2	GALNT2 (+109769)
	cg07060233	4.79607e-09	0.00020072	0.0254806	0.186585	0.0470958	9	20	44687092	SLC12A5	NCOA5 (+31498)
	cg21290745	4.8205e-09	0.000201743	-0.0355474	-0.412773	-0.0785146	1	20	62721573	OPRL1	OPRL1 (+5205)
	cg08208858	4.82248e-09	0.000201826	-0.163181	-0.33524	-0.0295006	4	5	71405743	MAP1B	MAP1B (+2683)
	cg25599924	4.83971e-09	0.000202547	-0.60138	-0.0164473	0.0824733	7	4	8396056	ACOX3	ACOX3 (+46381)
	cg13554209	4.86039e-09	0.000203412	-0.134991	-0.291168	0.0121113	5	6	129822623	LAMA2	ARHGAP18 (+208746)
	cg23757461	4.86666e-09	0.000203674	-0.0479161	-0.269022	-0.132651	4	18	55924888	NEDD4L	NEDD4L (+213279)
	cg18936222	4.88526e-09	0.000204453	0.0648289	0.190233	0.0391466	8	1	41826028		FOXO6 (-1565)
	cg10015444	4.91174e-09	0.000205561	-0.05924	-0.361774	-0.0837295	6	14	62273629		SNAPC1 (+44555)
	cg21136544	4.91971e-09	0.000205895	-0.0497412	-0.408425	-0.0228474	5	6	3160547		TUBB2A (-2788)
	cg05954609	4.92883e-09	0.000206277	-0.0347091	-0.328957	-0.0683911	6	5	60693289	ZSWIM6	ZSWIM6 (+65190)
	cg16262963	4.94098e-09	0.000206785	-0.00688527	-0.161848	-0.0855269	2	14	104851903		C14orf144 (+141363)
	cg07933926	4.94128e-09	0.000206797	0.0460326	0.0993053	0.0604485	8	12	6485881	SCNN1A	SCNN1A (-1492)
	cg05166138	4.94205e-09	0.00020683	-0.0247281	-0.149314	-0.175571	4	4	140823752	MAML3	MGST2 (+236831)
	cg27370890	4.95736e-09	0.000207471	-0.0326946	-0.274816	-0.134111	1	1	19274318	IFFO2	IFFO2 (+8861)
	cg11907437	4.96007e-09	0.000207584	0.0119835	-0.198643	-0.131586	1	6	170748956		PSMB1 (+113472)
	cg09669275	4.96615e-09	0.000207838	-0.0892972	-0.473174	-0.0363716	5	12	76209419		PHLDA1 (+218292)
	cg06538722	4.96938e-09	0.000207973	-0.241996	-0.331577	-0.00578048	4	3	126892095		PLXNA1 (+184659)
	cg17893159	5.02895e-09	0.000210467	-0.152484	-0.328034	-0.0362064	6	6	161695739	AGPAT4	AGPAT4 (-647)
	cg20627714	5.02932e-09	0.000210482	0.183958	0.004731	0.0893634	8	12	6432926	PLEKHG6	PLEKHG6 (+12828)
	cg20561564	5.03462e-09	0.000210704	-0.115018	-0.230626	-0.172193	4	9	121332707		BRINP1 (+799037)
	cg02875787	5.04427e-09	0.000211108	0.00627815	0.098444	0.050348	9	10	71562858	COL13A1	COL13A1 (+1171)	COL13A1	COL13A1	COL13A1
	cg09227865	5.05374e-09	0.000211504	-0.113013	-0.272297	-0.0733732	6	7	98399869		TMEM130 (+67619)
	cg00618596	5.06476e-09	0.000211965	-0.052479	-0.164018	-0.167437	2	16	71088536	HYDIN	HYDIN (+176055)
	cg13593622	5.09037e-09	0.000213037	0.0384137	-0.139774	-0.227989	1	3	24344983	THRB	THRB (+191282)
	cg13865019	5.09222e-09	0.000213115	-0.0867463	-0.112507	-0.229614	2	1	29681991		PTPRU (+118964)
	cg21694209	5.1172e-09	0.00021416	-0.326222	-0.244986	-0.00165854	5	11	946359	AP2A2	AP2A2 (+20479)
	cg25648430	5.13902e-09	0.000215073	-0.0340992	-0.131617	-0.257719	1	7	80506356	SEMA3C	SEMA3C (+42310)
	cg04934382	5.14455e-09	0.000215304	0.0121487	0.232548	0.0217351	9	17	77766335		CBX8 (+4579)
	cg02852327	5.15162e-09	0.0002156	-0.0320398	0.244969	0.0267071	9	7	121950975		FEZF1 (-6417)
	cg08473805	5.15374e-09	0.000215689	0.0581741	-0.154639	-0.284709	1	11	119573004	PVRL1	PVRL1 (+26789)
	cg08675364	5.15383e-09	0.000215693	-0.00471918	0.136004	0.0650825	9	16	85362963		FAM92B (-216850)
	cg10478319	5.15549e-09	0.000215762	-0.0147862	-0.207448	-0.155682	4	6	51882397	PKHD1	PKHD1 (+70025)
	cg00904576	5.16606e-09	0.000216205	0.0133853	-0.171602	-0.162931	1	1	181205459	GM140	IER5 (+147822)
	cg10693058	5.16947e-09	0.000216348	0.0493266	0.189005	0.0515547	8	19	41025658	SPTBN4	SPTBN4 (+53511)
	cg07028788	5.17864e-09	0.000216731	-0.058335	-0.122422	-0.221652	1	1	221100785		HLX (+49087)
	cg08147181	5.20291e-09	0.000217747	0.223546	0.272184	-0.00469108	8	14	103394355	AMN	AMN (+5363)
	cg08462883	5.20879e-09	0.000217993	-0.144858	-0.257708	0.00940411	5	14	23260631	SLC7A7	SLC7A7 (+24380)
	cg00433917	5.22171e-09	0.000218534	-0.0859934	-0.311985	-0.0440352	6	19	7915517	EVI5L	EVI5L (+4089)
	cg07371589	5.22203e-09	0.000218547	0.342656	0.293645	-0.00863262	8	1	151104367	SEMA6C	SEMA6C (+14565)
	cg26171645	5.24495e-09	0.000219507	-0.106469	-0.112402	-0.0339027	4	11	75380303	MAP6	MAP6 (-139)
	cg07100877	5.25415e-09	0.000219891	-0.118111	-0.211344	-0.0374779	2	17	79018560	BAIAP2	BAIAP2 (+9599)
	cg01020037	5.27039e-09	0.000220571	-0.329267	-0.111956	-0.000661112	6	6	31047822		C6orf15 (+32513)
	cg20200711	5.27449e-09	0.000220743	0.00384462	-0.225261	-0.12517	1	11	2211776		TH (-18742)
	cg08034392	5.28189e-09	0.000221052	-0.161306	-0.212111	0.035637	5	14	95999809	SNHG10	GLRX5 (-1120)
	cg18039298	5.28256e-09	0.00022108	-0.0560064	-0.436103	-0.0679984	6	14	100942739	WDR25	BEGAIN (+91667)
	cg04491823	5.30258e-09	0.000221918	-0.057819	-0.337167	-0.0653248	6	15	65510022		CILP (-6197)
	cg00196827	5.31188e-09	0.000222308	-0.0317438	0.292339	0.0801698	9	18	55108068	ONECUT2	ONECUT2 (+5152)
	cg17812917	5.3404e-09	0.000223501	0.0204807	-0.199835	-0.163455	1	3	72417721		RYBP (+78347)
	cg02638528	5.37059e-09	0.000224765	-0.0272714	0.263422	0.13498	9	14	57272877	OTX2	OTX2 (+4309)
	cg00000765	5.37088e-09	0.000224777	-0.0292833	-0.265539	-0.107347	4	1	230404313	GALNT2	PGBD5 (+109077)
	cg25616514	5.37851e-09	0.000225096	-0.0858981	-0.191188	-0.135054	4	3	11798996		TAMM41 (+89396)
	cg08772942	5.41699e-09	0.000226706	0.190033	0.148951	-0.00680791	8	17	2626991		CLUH (-11678)
	cg25717214	5.43985e-09	0.000227663	-0.156382	-0.241294	-0.0641073	4	15	74521182		CCDC33 (-7447)
	cg02770479	5.44656e-09	0.000227944	-0.362054	-0.130473	-0.0308703	6	22	32740149		RFPL3 (-13704)
	cg12598837	5.46396e-09	0.000228672	-0.00604979	0.176753	0.0586729	9	11	113845788	HTR3A	HTR3A (-8)
	cg24275948	5.46851e-09	0.000228863	0.0672505	0.205869	0.144004	8	1	156662023		CRABP2 (+13369)
	cg21350880	5.46949e-09	0.000228904	-0.154501	-0.0856176	-0.0858557	2	1	27849433		WASF2 (-32765)
	cg15296767	5.47197e-09	0.000229007	0.0888491	0.120383	0.0370085	8	11	64122743	CCDC88B	RPS6KA4 (-3899)
	cg09417716	5.48822e-09	0.000229687	-0.00896423	-0.139163	-0.0566102	1	14	101538133	MEG9	RTL1 (-186950)
	cg11368900	5.52876e-09	0.000231384	-0.0396557	-0.0928484	-0.102869	2	10	134896377		GPR123 (-5031)
	cg12109883	5.54045e-09	0.000231873	0.12441	0.271298	0.0414599	8	15	70489053		TLE3 (-98539)
	cg08464140	5.55925e-09	0.00023266	-0.198076	-0.346242	-0.0109623	6	7	5197343		WIPI2 (-32475)
	cg12915526	5.56205e-09	0.000232777	0.024665	-0.198988	-0.212202	1	15	61341359	RORA	RORA (-421698)
	cg00210562	5.56521e-09	0.00023291	0.269349	0.203725	0.0284635	8	15	89914046		POLG (-35969)
	cg09884153	5.59281e-09	0.000234065	0.184519	0.174061	-0.0129339	8	1	43205963	CLDN19	CLDN19 (-39)
	cg06359703	5.6194e-09	0.000235177	0.335279	0.187303	0.048213	8	1	41847297		FOXO6 (+19704)
	cg09157586	5.62966e-09	0.000235607	-0.515295	-0.0365108	0.118073	7	18	56486573		ZNF532 (-43258)
	cg10525642	5.657e-09	0.000236751	-0.0808724	-0.360203	-0.095503	4	4	7373375	SORCS2	PSAPL1 (+63324)
	cg18280830	5.65765e-09	0.000236778	0.0244164	0.169228	0.225314	9	14	57265875		OTX2 (+11311)
	cg25270355	5.6597e-09	0.000236864	-0.276301	-0.283468	0.0237571	5	3	25703642	TOP2B	TOP2B (+2347)
	cg11344121	5.65984e-09	0.00023687	-0.0415328	-0.370992	-0.0878912	3	7	140776653		TMEM178B (+2622)
	cg05556562	5.69465e-09	0.000238327	-0.130249	-0.410935	0.0195568	5	21	44789190		SIK1 (+57817)
	cg14765731	5.6973e-09	0.000238438	-0.286012	-0.23867	-0.0546151	4	11	35187831	CD44	CD44 (+27104)
	cg17552720	5.73622e-09	0.000240067	-0.00191327	0.133946	0.074284	9	17	36729521	SRCIN1	SRCIN1 (+32661)
	cg06905453	5.73854e-09	0.000240164	0.310697	0.266393	0.0207841	8	19	14089284	RFX1	DCAF15 (+25981)
	cg24213184	5.74021e-09	0.000240234	-0.0642772	-0.153877	-0.170259	2	9	72288470	APBA1	APBA1 (-1249)
	cg09692695	5.74188e-09	0.000240304	0.0420722	0.145237	0.0322947	8	2	74668286	RTKN	RTKN (+739)
	cg08266095	5.75136e-09	0.0002407	-0.681173	0.0408965	0.094339	7	5	123149716		CSNK1G3 (+301924)
	cg14784415	5.77417e-09	0.000241655	0.139665	0.163273	0.0372708	8	12	115890828		TBX3 (-769434)
	cg15054595	5.78564e-09	0.000242135	-0.107833	-0.425459	0.110548	5	3	49910483		CAMKV (-2829)
	cg17820345	5.86973e-09	0.000245654	0.0051044	-0.204009	-0.0156402	3	17	27967743	SSH2	CORO6 (-17827)
	cg09042884	5.88442e-09	0.000246269	0.304644	0.249667	0.0494302	8	12	6484892	SCNN1A	SCNN1A (-503)
	cg24618413	5.89129e-09	0.000246557	0.112228	0.147623	0.0373134	8	X	40007471	BCOR	BCOR (-50816)
	cg23055959	5.90147e-09	0.000246982	-0.242745	-0.402093	-0.080551	6	17	27908591	GIT1	GIT1 (+7975)
	cg02155957	5.91628e-09	0.000247602	0.363262	0.101021	0.0495565	8	1	46930731		DMBX1 (-41937)
	cg22127213	5.92294e-09	0.000247881	-0.0787935	-0.295948	-0.0711527	4	20	52374247		ZNF217 (-163870)
	cg24401539	5.93349e-09	0.000248323	-0.168509	-0.138018	-0.0194043	6	2	171626694	ERICH2	ERICH2 (-13601)
	cg13039539	5.9641e-09	0.000249604	-0.719747	0.0925456	-0.00627145	7	7	70038627	AUTS2	WBSCR17 (-558527)
	cg19469373	5.97708e-09	0.000250147	-0.273687	-0.115126	-0.0382362	6	12	59461066		LRIG3 (-146764)
	cg20718469	6.02316e-09	0.000252075	0.00123316	-0.187952	-0.191863	1	2	9280848		ASAP2 (-66045)
	cg07700857	6.06249e-09	0.000253721	-0.192482	-0.126972	-0.10897	4	7	69205025	AUTS2	AUTS2 (+140707)
	cg04773730	6.06269e-09	0.000253729	-0.246051	-0.0973895	-0.0683284	6	6	98117541	LOC101927314	MMS22L (-386490)
	cg17050011	6.0648e-09	0.000253818	0.0948634	0.240908	-0.0215218	8	1	68699381	WLS	WLS (-1154)
	cg27553162	6.06786e-09	0.000253946	0.0100471	0.116897	0.0647781	9	20	30582980	XKR7	CCM2L (-15272)
	cg06308522	6.09206e-09	0.000254959	-0.0133235	-0.0971079	-0.0997095	2	1	225768784	ENAH	ENAH (+72059)
	cg05861442	6.10712e-09	0.000255589	0.0113672	-0.175581	-0.21207	1	3	43455278	ANO10	SNRK (+127247)
	cg15760474	6.11321e-09	0.000255844	0.015585	-0.446656	-0.153362	1	6	41554529	FOXP4	FOXP4 (+40366)
	cg27279301	6.11801e-09	0.000256045	0.307459	0.342473	0.002756	8	14	105945287	CRIP2	CRIP2 (+5989)
	cg18650626	6.13126e-09	0.000256599	0.0209579	-0.165996	-0.166449	1	7	1914073	MAD1L1	ELFN1 (+186319)
	cg25838080	6.13964e-09	0.00025695	0.0227191	0.249381	0.0616004	8	6	108489026	NR2E1	NR2E1 (+1765)
	cg00710515	6.15549e-09	0.000257613	-0.025544	-0.142841	-0.208538	2	6	1136873		FOXQ1 (-175801)
	cg24659873	6.18219e-09	0.000258731	0.00277682	-0.608478	0.0255527	5	22	41107862		MCHR1 (+33109)
	cg05562466	6.20546e-09	0.000259705	-0.0753715	-0.188824	-0.0577845	2	10	76969763	VDAC2	VDAC2 (-842)
	cg17803629	6.21489e-09	0.000260099	-0.0562488	-0.271647	-0.117118	4	17	7310577	NLGN2	NLGN2 (-924)
	cg05250932	6.21796e-09	0.000260228	-0.0565214	-0.207625	-0.247752	4	19	55644229	TNNT1	PPP1R12C (-15303)
	cg21380925	6.23437e-09	0.000260915	-0.0936025	-0.0838087	-0.111755	4	10	123070327		FGFR2 (+287589)
	cg19959921	6.27464e-09	0.0002626	0.235417	0.15265	0.0644521	8	1	114521960	OLFML3	OLFML3 (-104)
	cg06665366	6.28302e-09	0.000262951	-0.467931	-0.06978	-0.0806038	4	19	34249572	CHST8	KCTD15 (-39718)
	cg18693822	6.28408e-09	0.000262995	-0.0200751	-0.438141	-0.115556	3	7	55620604	VOPP1	VOPP1 (+19613)
	cg09938462	6.28785e-09	0.000263153	0.0102222	0.177805	0.0306468	8	22	19706365	38596	GP1BB (-4102)
	cg00804179	6.30319e-09	0.000263795	-0.595424	-0.168268	-0.0481889	6	3	13083974	IQSEC1	IQSEC1 (-74807)
	cg14202616	6.30594e-09	0.00026391	-0.102022	-0.374759	-0.0306585	2	14	93357765		CHGA (-31659)
	cg20658081	6.32711e-09	0.000264796	0.0725939	0.104993	0.0429391	8	5	175293550	CPLX2	CPLX2 (+70238)
	cg15862394	6.33619e-09	0.000265176	-0.0691242	-0.10928	-0.228267	4	14	95403133		GSC (-166572)
	cg22376856	6.36083e-09	0.000266207	-0.164381	-0.188504	-0.033039	6	1	204643556	LRRN2	LRRN2 (-52224)
	cg13103874	6.36882e-09	0.000266541	-0.0621339	-0.40279	0.051995	5	14	77552990		CIPC (-11449)
	cg18800748	6.37103e-09	0.000266634	-0.356889	-0.272353	0.0504003	6	17	39873894		GAST (+5317)
	cg09431410	6.38671e-09	0.00026729	-0.246087	-0.20862	0.0860304	5	15	36720391		MEIS2 (+671694)
	cg14868258	6.43555e-09	0.000269334	-0.164167	-0.138342	-0.0188828	4	6	82958285	IBTK	IBTK (-815)
	cg06316673	6.4832e-09	0.000271328	-0.0765271	-0.127264	-0.0649262	2	11	126188697	DCPS	DCPS (+15051)
	cg19386379	6.4839e-09	0.000271358	0.099301	0.150845	0.0572482	8	11	844284	TSPAN4	TSPAN4 (-161)
	cg09977684	6.51083e-09	0.000272485	-0.16853	-0.246794	-0.0178439	6	2	236563115	AGAP1	AGAP1 (+160365)
	cg23867441	6.51665e-09	0.000272728	-0.0101976	-0.334224	-0.00378215	5	13	33769544	STARD13	STARD13 (+90347)
	cg06460832	6.52509e-09	0.000273082	0.00493056	-0.223384	-0.111542	1	4	129376003	LOC100507487	PGRMC2 (-166020)
	cg12416856	6.5563e-09	0.000274388	-0.0485204	-0.1214	-0.133977	1	1	230404284	GALNT2	PGBD5 (+109106)
	cg02383626	6.62745e-09	0.000277366	-0.574608	0.054329	0.0453728	7	19	18455508	PGPEP1	PGPEP1 (+4112)
	cg04626117	6.63069e-09	0.000277501	-0.0618578	-0.347479	-0.0948105	6	18	36332135		NONE
	cg26799416	6.64537e-09	0.000278116	-0.0511917	-0.52399	0.00813095	6	22	42611379	TCF20	TCF20 (+68)
	cg07244177	6.66776e-09	0.000279052	-0.0731878	-0.343777	0.0177802	5	4	153516867		FBXW7 (-59615)
	cg06830450	6.68576e-09	0.000279806	0.129621	0.21626	0.112812	8	12	58121004	LOC100130776	AGAP2 (+11024)
	cg05746918	6.70633e-09	0.000280667	-0.0264654	-0.259297	-0.129915	1	3	127348722	PODXL2	PODXL2 (+699)
	cg21546074	6.75819e-09	0.000282837	-0.222759	-0.346966	-0.0426419	6	2	6122452	LOC400940	SOX11 (+289654)
	cg27350073	6.76213e-09	0.000283002	-0.128183	-0.236713	-0.144361	4	3	105960717		CBLB (-372831)
	cg09941713	6.76557e-09	0.000283146	-0.390126	-0.0926066	-0.0720155	4	8	61705332	CHD7	CHD7 (+113996)
	cg11139482	6.77422e-09	0.000283508	0.123722	0.115663	0.0427798	8	19	19384364	TM6SF2	TM6SF2 (-268)
	cg17726760	6.77438e-09	0.000283515	0.0311033	0.206082	0.107465	9	15	67439412	SMAD3	SMAD3 (+81230)
	cg14603031	6.80383e-09	0.000284747	-0.00197983	0.239473	0.095273	9	7	2563184	LFNG	LFNG (+3709)
	cg10174680	6.80399e-09	0.000284754	-0.307377	-0.195999	-0.0221749	4	8	105430351	DPYS	DPYS (+48929)
	cg04441103	6.81759e-09	0.000285323	-0.0100428	-0.126754	-0.212156	1	17	52876		DOC2B (-21450)
	cg16596367	6.8205e-09	0.000285445	-0.089096	-0.283521	-0.0737553	6	16	89070757		CBFA2T3 (-27146)
	cg00906420	6.82429e-09	0.000285603	-0.121307	-0.23378	-0.0462652	4	3	78917133	ROBO1	ROBO1 (+899831)
	cg26672917	6.83106e-09	0.000285887	-0.119769	-0.196664	-0.179829	4	9	126703700		DENND1A (-11315)
	cg10385692	6.83445e-09	0.000286029	-0.154325	-0.334549	-0.0474253	6	16	1175678		CACNA1H (-27562)
	cg11391811	6.86523e-09	0.000287317	-0.131417	-0.147549	-0.157771	4	3	5044179		BHLHE40 (+23379)
	cg22922553	6.88268e-09	0.000288047	-0.180775	-0.0607126	-0.123091	4	15	52945636	FAM214A	FAM214A (+25183)
	cg10439246	6.89507e-09	0.000288566	-0.0203514	-0.167291	-0.312218	1	6	85824196		NT5E (-335612)
	cg05521610	6.90165e-09	0.000288841	-0.359686	-0.131827	0.0209494	5	17	75889184		TNRC6C (-111952)
	cg09787308	6.91015e-09	0.000289197	-0.0599461	-0.256122	-0.126385	4	2	135065189	MGAT5	MGAT5 (+187437)
	cg04569152	6.92531e-09	0.000289831	-0.128535	-0.248211	0.0125108	5	14	21555603	FLJ10357	ZNF219 (+11195)
	cg02891664	6.93167e-09	0.000290098	-0.0513536	-0.114692	-0.0170053	6	4	1004678	FGFRL1	FGFRL1 (+912)
	cg18871253	6.94079e-09	0.000290479	-0.478481	0.07031	0.0640404	7	7	114055137	FOXP2	FOXP2 (+86)
	cg08644489	6.94913e-09	0.000290828	-0.231202	-0.314761	0.0504961	5	1	39657910	MACF1	MACF1 (+108877)
	cg23154011	6.96413e-09	0.000291456	-0.0221276	-0.318754	-0.116587	3	1	23340513	C1orf234	KDM1A (-5472)
	cg13078447	6.97371e-09	0.000291857	-0.201969	-0.284289	-0.0966812	4	5	149689279		ARSI (-6764)
	cg01165615	6.97978e-09	0.000292111	0.025593	0.250542	0.076432	8	3	71355299	FOXP1	FOXP1 (-175312)
	cg25521439	6.98993e-09	0.000292536	-0.0857903	-0.258065	-0.161625	4	2	240114348	HDAC4	HDAC4 (+208294)
	cg26846380	7.01328e-09	0.000293513	-0.215444	-0.159643	-0.0908713	4	1	205662865		SLC45A3 (-13279)
	cg18524757	7.04512e-09	0.000294845	0.0294152	0.172967	0.0496661	8	9	91605821	S1PR3	C9orf47 (-21)
	cg15314327	7.06049e-09	0.000295489	-0.297702	-0.257375	-0.0217314	6	18	13375087	LDLRAD4	LDLRAD4 (+156302)
	cg01971001	7.08339e-09	0.000296447	-0.124475	-0.358112	-0.133277	6	5	946337		BRD9 (-53399)
	cg16081403	7.08489e-09	0.00029651	-0.198738	-0.0874382	-0.14402	4	18	59220555	CDH20	CDH20 (+219741)
	cg18038269	7.0943e-09	0.000296904	0.229735	0.38154	-0.0132016	8	19	10464320	TYK2	ICAM3 (-13822)
	cg12897991	7.11016e-09	0.000297567	-0.0862127	-0.368103	0.032055	5	11	23145532		SVIP (-294122)
	cg15915835	7.11974e-09	0.000297968	-0.0144412	-0.161685	-0.271949	1	2	6374379		SOX11 (+541581)
	cg17983742	7.13616e-09	0.000298656	-0.387062	-0.145108	0.0445825	6	2	235997423		SH3BP4 (+110095)
	cg01308536	7.18307e-09	0.000300619	-0.137669	-0.338121	-0.0652766	6	16	81729051	CMIP	PLCG2 (-83811)
	cg27543513	7.18516e-09	0.000300706	-0.0420422	-0.155915	-0.223012	1	5	136014978		TRPC7 (-313754)
	cg01954422	7.1859e-09	0.000300737	-0.104331	-0.173801	-0.171191	4	6	24583546	KIAA0319	KIAA0319 (+62836)
	cg06186202	7.20152e-09	0.000301391	-0.0026408	0.182582	0.152215	9	3	147099476		ZIC4 (+22594)
	cg24231804	7.20736e-09	0.000301635	-0.196732	-0.276851	0.0896637	5	15	67316861		SMAD3 (-41321)
	cg14480531	7.21183e-09	0.000301822	-0.02251	-0.123715	-0.159683	1	17	55700565	MSI2	CCDC182 (+122107)
	cg18515031	7.23992e-09	0.000302998	-0.0426266	-0.218384	-0.22848	4	10	73988469	C10orf104	ASCC1 (-12437)
	cg03331695	7.26846e-09	0.000304192	-0.263787	-0.176052	-0.094395	6	X	102775412	RAB40A	RAB40A (-17610)
	cg11818522	7.2858e-09	0.000304918	-0.044594	-0.329142	0.0046286	5	15	80733538	ARNT2	ARNT2 (+36846)
	cg02304427	7.29336e-09	0.000305234	-0.0040979	0.129434	0.0702703	9	11	46402548	MDK	MDK (+243)
	cg10708955	7.31242e-09	0.000306032	-0.227529	-0.205961	0.0294779	5	17	8056950	PER1	PER1 (-1198)
	cg17395885	7.35055e-09	0.000307628	-0.346959	-0.0875099	-0.161094	4	12	116602340	MED13L	MED13L (+112802)
	cg20952901	7.36673e-09	0.000308305	0.133409	0.248419	0.0707995	8	19	17403529	ABHD8	ABHD8 (+10752)
	cg26953234	7.37626e-09	0.000308704	-0.106527	0.388872	0.151141	9	X	132547142	GPC4	GPC4 (+2375)
	cg13286437	7.40716e-09	0.000309997	-0.0442471	-0.412028	0.0532128	5	1	234738753		IRF2BP2 (+6517)
	cg13769477	7.41059e-09	0.000310141	0.240961	0.161786	0.039672	8	19	46144780	EML2-AS1	EML2 (+4106)
	cg02351655	7.41562e-09	0.000310351	0.171207	0.13503	0.0469305	8	16	4442918	CORO7	VASN (+21070)
	cg04552852	7.4299e-09	0.000310949	0.0863274	0.186941	0.0510925	8	11	844390	TSPAN4	TSPAN4 (-55)
	cg15164173	7.4378e-09	0.000311279	-0.119841	-0.234306	-0.00546908	6	11	13461837	BTBD10	BTBD10 (+22989)
	cg15592740	7.47656e-09	0.000312902	-0.0197003	-0.123838	-0.253556	1	1	10518183		CORT (+8408)
	cg07857234	7.4893e-09	0.000313435	-0.106268	-0.469989	0.0128397	6	12	118628449	TAOK3	PEBP1 (+54787)
	cg20189782	7.48984e-09	0.000313457	-0.259881	-0.279674	-0.0224041	4	5	156772757	CYFIP2	FNDC9 (-29)
	cg11197233	7.49202e-09	0.000313548	-0.0497585	-0.422544	-0.0163738	3	X	103554904		ESX1 (-55291)
	cg07838535	7.49232e-09	0.000313561	-0.0994612	-0.13358	-0.0452115	4	7	99718257	TAF6	TAF6 (-794)
	cg23256108	7.49484e-09	0.000313666	0.114924	-0.1309	-0.212234	1	11	117704267	FXYD6-FXYD2	FXYD2 (-8809)
	cg14042988	7.50277e-09	0.000313998	-0.308789	-0.126628	-0.0583458	4	15	39719453		THBS1 (-153840)
	cg24085215	7.53211e-09	0.000315226	-0.219005	-0.338194	-0.0549054	6	12	52347143	ACVR1B	ACVR1B (+1659)
	cg09803959	7.53336e-09	0.000315279	-0.193807	-0.315404	-0.0238626	6	17	78865514	RPTOR	CHMP6 (-100126)
	cg17870997	7.53969e-09	0.000315544	-0.0156894	0.158357	0.134713	9	2	121498521		GLI2 (-51463)
	cg14630394	7.57083e-09	0.000316847	-0.0489416	-0.342849	-0.00956664	6	1	54881929		SSBP3 (-9838)
	cg07696354	7.59718e-09	0.00031795	-0.0820612	-0.484112	-0.0592094	4	4	153527031		FBXW7 (-69779)
	cg17449197	7.62452e-09	0.000319094	-0.159199	-0.0612427	-0.136139	4	5	176302976	UNC5A	HK3 (+23356)
	cg13490483	7.62742e-09	0.000319215	-0.0451575	-0.203239	-0.104738	4	16	89425860	ANKRD11	ANKRD11 (+131108)
	cg02135001	7.63623e-09	0.000319584	-0.175472	-0.238512	-0.0174512	6	X	102406928		NXF3 (-58876)
	cg22827210	7.63794e-09	0.000319656	-0.0839992	-0.377493	0.0757513	5	12	104998182	CHST11	CHST11 (+147432)
	cg12298529	7.64664e-09	0.00032002	-0.0121046	0.129636	0.0539911	9	12	122019964	KDM2B	KDM2B (-1076)
	cg13803379	7.64688e-09	0.00032003	-0.0466354	-0.355675	-0.179012	4	1	241992272		EXO1 (-19209)
	cg23488804	7.66468e-09	0.000320775	0.0575602	0.155304	0.0779455	8	17	42393982	RUNDC3A	RUNDC3A (+8056)
	cg20705781	7.69514e-09	0.000322049	0.126184	0.141907	0.00716827	8	11	67070238	SSH3	SSH3 (-680)
	cg14308509	7.69907e-09	0.000322214	0.00317213	-0.122239	-0.10092	2	7	4757929	FOXK1	FOXK1 (+35990)
	cg26824564	7.70122e-09	0.000322304	-0.080679	-0.152929	-0.179342	4	8	142141484	DENND3	DENND3 (+2765)
	cg05270949	7.71499e-09	0.00032288	-0.22499	-0.211291	0.0717305	5	16	81400186	GAN	GAN (+51630)
	cg06059810	7.7163e-09	0.000322935	-0.372633	-0.20593	-0.0226517	4	4	71587722	RUFY3	RUFY3 (+11)
	cg15921100	7.71667e-09	0.000322951	0.00130435	0.176971	0.0683551	9	18	55108340	ONECUT2	ONECUT2 (+5424)
	cg13374264	7.73285e-09	0.000323627	-0.0696484	-0.355003	0.032977	5	1	7170661	CAMTA1	CAMTA1 (+325278)
	cg02547778	7.74401e-09	0.000324095	-0.195583	-0.364629	-0.0457053	6	7	5850607		RNF216 (-29238)
	cg02503609	7.74462e-09	0.00032412	-0.113919	-0.305917	-0.160395	4	8	26087912		PPP2R2A (-62819)
	cg03459809	7.7541e-09	0.000324517	-0.234024	-0.178029	-0.14845	4	1	226013010	EPHX1	EPHX1 (-44)
	cg13675621	7.75476e-09	0.000324544	-0.0282415	-0.124559	-0.0601012	2	17	75673452		TNRC6C (-327684)
	cg02833614	7.76994e-09	0.00032518	-0.119169	-0.145232	-0.0607044	4	10	134536157	INPP5A	NKX6-2 (+63398)
	cg26572392	7.7785e-09	0.000325538	0.0868913	0.142918	0.0618484	8	10	24496943	KIAA1217	KIAA1217 (-1149)
	cg00174103	7.82276e-09	0.00032739	0.00712779	-0.168741	-0.107017	1	7	116654903	ST7	ST7 (+61523)
	cg09373015	7.87395e-09	0.000329533	0.187626	0.154165	-0.0177697	8	6	41338895		NCR2 (+35369)
	cg09722426	7.87709e-09	0.000329664	-0.145263	-0.280276	-0.0724792	6	22	35695253	TOM1	TOM1 (-543)
	cg03873953	7.8822e-09	0.000329878	0.0310845	-0.144986	-0.157005	1	5	57479278		PLK2 (+276808)
	cg23171477	7.92902e-09	0.000331837	-0.0137143	-0.130446	-0.113864	1	2	135922344	RAB3GAP1	RAB3GAP1 (+112477)
	cg08328727	8.04701e-09	0.000336775	-0.0753792	-0.41282	0.0230899	5	2	75704065		EVA1A (+92782)
	cg03250870	8.0573e-09	0.000337206	0.000307611	-0.118049	-0.237683	1	17	77311812	HRNBP3	RBFOX3 (+166750)
	cg04101806	8.0581e-09	0.000337239	0.261274	0.168328	0.0809071	8	2	100722584	AFF3	AFF3 (-540)
	cg25666919	8.08024e-09	0.000338166	-0.0958989	-0.242684	-0.0311531	6	7	102074615	ORAI2	ORAI2 (+620)
	cg06570848	8.09772e-09	0.000338898	-0.0409274	0.214173	0.112903	9	1	160032135	KCNJ10	KCNJ10 (+7902)
	cg06601450	8.10426e-09	0.000339171	-0.232612	-0.286812	0.0301862	5	11	70323814	SHANK2	CTTN (+79168)
	cg20323015	8.12806e-09	0.000340167	-0.0895899	-0.0597497	-0.2056	4	8	28909093	HMBOX1	HMBOX1 (+161173)
	cg16177556	8.15484e-09	0.000341288	-0.116948	-0.392947	-0.102234	6	4	186876457	SORBS2	SORBS2 (+1348)
	cg11581168	8.16289e-09	0.000341625	-0.0237363	-0.352456	-0.10186	4	22	32866138		FBXO7 (-4524)
	cg09289439	8.16725e-09	0.000341807	-0.0446258	-0.217902	-0.102187	4	7	73994764	GTF2IRD1	GTF2I (-77246)
	cg24743778	8.1717e-09	0.000341994	-0.168691	-0.129158	-0.0229231	6	2	220379058	ACCN4	ASIC4 (+7)
	cg26414014	8.22621e-09	0.000344275	-0.0363889	-0.269797	-0.237475	4	6	91387292		MAP3K7 (-90529)
	cg26257411	8.25444e-09	0.000345457	-0.19456	-0.149189	-0.0616688	4	6	33397122	SYNGAP1	SYNGAP1 (+9182)
	cg13706058	8.26276e-09	0.000345805	-0.0115404	-0.174084	-0.331438	1	6	85824168		NT5E (-335640)
	cg09778663	8.26859e-09	0.000346049	-0.0408539	-0.278007	-0.177329	4	22	23923259	IGLL1	IGLL1 (-765)
	cg15573998	8.3121e-09	0.00034787	-0.0144137	0.205371	0.0476996	9	2	51228125	NRXN1	NRXN1 (+31411)
	cg27087377	8.31224e-09	0.000347876	-0.14752	-0.259039	-0.0786478	6	22	26875563	HPS4	HPS4 (+4214)
	cg20278291	8.33272e-09	0.000348733	-0.0222984	0.147146	0.136246	9	14	57272340	OTX2	OTX2 (+4846)
	cg05499018	8.33995e-09	0.000349035	-0.22587	-0.255378	0.00440361	6	18	37321978	LINC00669	NONE
	cg14892189	8.3793e-09	0.000350682	0.0402411	-0.151549	-0.0816139	1	13	105636940		DAOA (-481651)
	cg19876672	8.38059e-09	0.000350736	-0.00630663	0.196284	0.0884076	9	10	118891266	VAX1	VAX1 (+6300)
	cg17586094	8.3966e-09	0.000351406	-0.164349	-0.190925	-0.133367	4	2	235244520		ARL4C (+161176)
	cg04235931	8.42023e-09	0.000352395	-0.0500631	-0.192042	-0.0984216	4	X	43562614	MAOA	MAOA (+47148)
	cg12140749	8.44757e-09	0.000353539	0.392445	0.107836	-0.0327774	8	14	69264039	C14orf181	ZFP36L1 (-4083)
	cg14826891	8.44787e-09	0.000353552	-0.0125575	-0.321801	-0.153461	4	17	32404422	ACCN1	CCL2 (-177881)
	cg08227282	8.45199e-09	0.000353724	-0.0147535	-0.158687	-0.0911441	1	22	26718581	SEZ6L	ASPHD2 (-106657)
	cg17108423	8.45935e-09	0.000354032	-0.265143	-0.11482	-0.0439499	6	6	170559792		DLL1 (+39768)
	cg07441712	8.46434e-09	0.000354241	-0.0108164	-0.183309	-0.232484	1	11	35067008		CD44 (-93719)
	cg20709110	8.48089e-09	0.000354934	0.0138824	0.0773821	0.0455701	9	22	19946873	COMT	TXNRD2 (-17541)
	cg12299931	8.48932e-09	0.000355287	-0.0380767	-0.0739956	-0.0806136	4	13	103940723		SLC10A2 (-221528)
	cg12093060	8.5098e-09	0.000356144	-0.0824257	-0.25976	-0.118217	4	1	21993401	RAP1GAP	RAP1GAP (-15054)
	cg20706768	8.5272e-09	0.000356872	-0.0977373	-0.179187	-0.120234	2	7	55225183	EGFR	EGFR (+138390)
	cg14491800	8.52751e-09	0.000356885	-0.0182802	-0.343647	0.0861798	5	14	77385166		ANGEL1 (-105884)
	cg26266991	8.53908e-09	0.000357369	0.034536	-0.249143	-0.149564	1	1	209797061	LAMB3	LAMB3 (+27617)
	cg26857257	8.5464e-09	0.000357675	-0.262484	-0.156347	0.0327485	5	11	75578963	UVRAG	UVRAG (+52752)
	cg00973622	8.57038e-09	0.000358679	-0.014686	-0.277249	-0.113585	4	8	81949124	PAG1	PAG1 (+75178)
	cg02672827	8.5745e-09	0.000358851	-0.0046761	-0.34719	-0.211468	1	3	16557690		RFTN1 (-2478)
	cg15509704	8.58804e-09	0.000359418	-0.013109	-0.311808	-0.107403	4	20	36363187	CTNNBL1	CTNNBL1 (+40780)
	cg05492113	8.60205e-09	0.000360005	-0.149448	-0.369371	0.0310791	5	11	8060332	TUB	TUB (+153)
	cg14459059	8.64061e-09	0.000361618	-0.160609	-0.135315	-0.196292	4	14	56582857		PELI2 (-2235)
	cg16786274	8.64714e-09	0.000361892	-0.0308165	-0.245611	-0.115048	4	13	102865555	FGF14	FGF14 (+188568)
	cg05223210	8.65023e-09	0.000362021	0.0920672	0.156323	0.0441734	8	11	117630397	DSCAML1	DSCAML1 (+37578)
	cg19634573	8.6561e-09	0.000362266	-0.0192777	-0.240482	-0.179021	4	10	126397072	FAM53B	FAM53B (+35546)
	cg00552255	8.67074e-09	0.000362879	-0.0182643	-0.212904	-0.138241	4	15	94372815		MCTP2 (-468679)
	cg01426818	8.80596e-09	0.000368538	0.0463752	0.1912	0.100774	9	17	77806444		CBX4 (+6783)
	cg15776416	8.8175e-09	0.000369021	-0.197269	-0.154426	-0.0774262	4	3	195529779	MUC4	MUC4 (+9368)
	cg23716690	8.82486e-09	0.000369329	0.0141458	-0.175626	-0.129474	1	1	10314029	KIF1B	KIF1B (+43167)
	cg23281819	8.84511e-09	0.000370177	-0.000979838	-0.461275	0.108925	5	14	58549377	C14orf37	C14orf37 (+69553)
	cg01565703	8.84648e-09	0.000370234	-0.201185	-0.323781	0.109084	5	14	103245090	TRAF3	TRAF3 (+1278)
	cg12823850	8.98274e-09	0.000375936	0.127354	0.191367	0.0851684	8	17	80189989	SLC16A3	SLC16A3 (-1573)
	cg05685483	8.98534e-09	0.000376046	-0.0584472	-0.0964431	-0.122693	2	2	237172796	ASB18	ASB18 (+191)
	cg14574476	9.00135e-09	0.000376715	-0.104556	-0.106435	-0.132923	2	14	68488011	RAD51B	RAD51B (+201487)
	cg20279977	9.05154e-09	0.000378816	0.0412753	-0.430482	-0.0463454	3	3	113933043		ZNF80 (+23381)
	cg12146150	9.10191e-09	0.000380924	0.230872	0.177456	0.0448827	8	17	8958090	NTN1	NTN1 (+33232)
	cg10893604	9.13831e-09	0.000382448	-0.116273	-0.329065	-0.00128297	5	8	27976377	ELP3	ELP3 (+26023)
	cg00497679	9.16327e-09	0.000383492	-0.124873	-0.0559048	-0.185611	4	17	64827647		CACNG5 (-3587)
	cg24384951	9.1918e-09	0.000384686	-0.0471661	-0.25305	-0.0317663	2	16	11763519	SNN	SNN (+1250)
	cg26430059	9.24475e-09	0.000386902	-0.467219	-0.148017	-0.0290213	6	14	89770384	FOXN3	FOXN3 (+315089)
	cg23683800	9.29792e-09	0.000389127	-0.395564	-0.16382	0.0656696	5	10	115086103		HABP2 (-226681)
	cg25153741	9.32657e-09	0.000390326	0.020757	-0.162685	-0.15883	1	5	177913468	COL23A1	COL23A1 (+104087)
	cg06140237	9.32745e-09	0.000390363	-0.0158059	-0.135617	-0.0996749	1	4	41191243	APBB2	APBB2 (+25305)
	cg09336589	9.33805e-09	0.000390807	-0.243292	-0.237732	-0.0468872	4	17	7107939	DLG4	ACADVL (-12504)
	cg09396517	9.33912e-09	0.000390851	-0.0334201	0.228152	0.0742058	9	11	615642	IRF7	IRF7 (+85)
	cg14775247	9.34637e-09	0.000391155	0.0102067	-0.109026	-0.132114	1	17	43067142		C1QL1 (-21704)
	cg05191942	9.34927e-09	0.000391276	0.0280406	-0.173129	-0.156223	1	1	22439320		WNT4 (+30138)
	cg25644567	9.39331e-09	0.00039312	-0.0671172	-0.425441	0.091242	5	2	65593921	SPRED2	SPRED2 (+65389)
	cg13474090	9.4044e-09	0.000393583	-0.17686	-0.116664	-0.0480898	6	9	92027541	SEMA4D	SEMA4D (+6206)
	cg01966561	9.42032e-09	0.00039425	-0.0647788	-0.249526	-0.0969442	6	7	1733570		ELFN1 (+5816)
	cg15128785	9.46588e-09	0.000396156	-0.342938	-0.138158	-0.00262148	6	22	42230879	SREBF2	SREBF2 (+1771)
	cg03851159	9.48641e-09	0.000397016	0.00303839	0.235771	0.0460135	8	10	118891090	VAX1	VAX1 (+6476)
	cg01123964	9.50252e-09	0.00039769	-0.0600634	-0.341099	-0.0735306	4	X	85218949	CHM	CHM (+83616)
	cg09242168	9.52067e-09	0.00039845	0.079293	0.215783	0.098492	8	15	31214337	FAN1	FAN1 (+18262)
	cg01787285	9.54099e-09	0.0003993	-0.317094	-0.238661	-0.0164518	6	1	2162682	SKI	SKI (+2549)
	cg08917985	9.54982e-09	0.00039967	-0.274584	-0.327053	-0.0950309	6	11	36300646	COMMD9	COMMD9 (+10332)
	cg11546621	9.5589e-09	0.00040005	0.208481	0.0752022	0.0537416	8	9	139872161	PTGDS	PTGDS (+205)
	cg25283707	9.58551e-09	0.000401163	0.00154967	-0.13404	-0.0576543	1	10	119190924		PDZD8 (-55947)
	cg02948319	9.58819e-09	0.000401275	0.0335788	0.0809208	0.0604883	8	X	68370242		PJA1 (+15121)
	cg08438529	9.61107e-09	0.000402233	-0.20488	-0.467123	0.0898779	5	16	1052939		SOX8 (+21132)
	cg24692310	9.61234e-09	0.000402286	0.0223788	-0.335152	-0.0546007	1	11	60915630	VPS37C	VPS37C (+13458)
	cg03361294	9.61579e-09	0.000402431	-0.0213944	-0.411785	0.0657941	5	14	57051003	TMEM260	TMEM260 (+4493)
	cg16451366	9.62458e-09	0.000402798	-0.386887	-0.17821	-0.0531351	4	5	58123584	RAB3C	RAB3C (+244718)
	cg25342207	9.64177e-09	0.000403518	-0.0121596	-0.135381	-0.222189	1	10	131708262	EBF3	EBF3 (+53842)
	cg02841199	9.66937e-09	0.000404673	-0.138685	-0.128834	0.00444097	5	6	80247907	LCA5	LCA5 (-761)
	cg23104428	9.68373e-09	0.000405274	-0.00839609	-0.247162	-0.0738305	2	2	47299631	TTC7A	C2orf61 (+82885)
	cg24290487	9.71699e-09	0.000406666	-0.213232	-0.177461	-0.134104	2	11	119763422		PVRL1 (-163629)
	cg17588400	9.73524e-09	0.00040743	-0.206465	-0.176554	-0.183297	4	4	1376165	KIAA1530	CRIPAK (-9174)
	cg18302639	9.7388e-09	0.000407578	-0.314235	-0.166837	0.0380688	6	5	173091319		BOD1 (-47657)
	cg27226424	9.77752e-09	0.000409199	-0.012123	-0.115918	-0.162545	1	4	183795763		DCTD (+42768)
	cg09886037	9.78506e-09	0.000409514	-0.184308	-0.0377754	-0.19041	4	1	20250207	PLA2G2E	PLA2G2E (-98)
	cg16145674	9.78515e-09	0.000409518	-0.158516	-0.0926491	-0.12104	2	7	55501178	LANCL2	LANCL2 (+68038)
	cg13255398	9.78903e-09	0.000409681	-0.196919	-0.154654	-0.165026	4	11	16836827	PLEKHA7	C11orf58 (+76880)
	cg12159995	9.7895e-09	0.0004097	-0.0286379	-0.111545	-0.186018	1	11	70398671	SHANK2	CTTN (+154025)
	cg26808436	9.79902e-09	0.000410099	0.0730688	0.278758	0.0813552	8	6	108492696	NR2E1	NR2E1 (+5435)
	cg07915206	9.80265e-09	0.000410251	-0.0666491	-0.0919658	-0.0658138	2	15	34260555	AVEN	CHRM5 (-533)
	cg16685712	9.8097e-09	0.000410546	0.0234655	-0.324743	-0.0946573	1	10	11272899	CELF2	CELF2 (+213007)
	cg17220055	9.86149e-09	0.000412713	-0.214454	-0.326558	0.073399	5	1	42248998	HIVEP3	HIVEP3 (+135170)
	cg08227353	9.87307e-09	0.000413198	0.196177	0.126858	0.013874	8	10	102821670	KAZALD1	KAZALD1 (+73)
	cg13000185	9.93031e-09	0.000415593	-0.177372	-0.183128	-0.0875905	6	16	57727682	DRC7	CCDC135 (-1029)
	cg22185100	9.93822e-09	0.000415925	0.0136069	0.117629	0.119176	9	20	20344529		INSM1 (-4235)
	cg08819802	9.96535e-09	0.00041706	-0.0388208	-0.216853	-0.201981	1	8	26893913		ADRA1A (-170992)
	cg14749573	1.00041e-08	0.000418681	-0.0309782	-0.231567	-0.231416	4	4	33151488		NONE
	cg23641707	1.00067e-08	0.000418792	-0.272007	-0.293111	-0.0189901	6	2	151341348	RND3	RND3 (+2832)
	cg01955745	1.00169e-08	0.000419218	-0.218496	-0.239506	-0.049824	4	11	131240413	NTM	SNX19 (-454010)
	cg16179670	1.00272e-08	0.00041965	0.0735699	-0.179869	-0.0682429	1	7	131808868	PLXNA4	PLXNA4 (+453191)
	cg02586450	1.0028e-08	0.000419684	-0.0751239	-0.349481	-0.0122789	2	3	127255687	LINC01471	TPRA1 (+53924)
	cg00693252	1.00294e-08	0.00041974	-0.0186356	-0.0870369	-0.092202	4	2	46732704		ATP6V1E2 (+14391)
	cg18823637	1.00342e-08	0.000419941	-0.140683	-0.130361	-0.0318456	6	14	104789524		C14orf144 (+78984)
	cg04477939	1.0065e-08	0.000421231	-0.148342	-0.226719	-0.0943954	4	5	95748998	PCSK1	PCSK1 (+19985)
	cg06205391	1.00753e-08	0.00042166	0.0253897	-0.187355	-0.145035	1	2	54698727	SPTBN1	SPTBN1 (+15306)
	cg12861162	1.01385e-08	0.000424305	-0.218115	-0.219597	-0.0730614	4	15	31544655		KLF13 (-74402)
	cg21539510	1.01467e-08	0.000424651	-0.0297965	-0.20948	-0.0185233	2	6	135819589	C6orf217	AHI1 (-707)
	cg12221428	1.01907e-08	0.000426493	-0.454507	-0.078474	-0.085652	6	8	28535162		EXTL3 (-23681)
	cg02671171	1.02393e-08	0.000428523	-0.0438753	-0.154191	-0.21446	1	17	203087	RPH3AL	RPH3AL (-490)
	cg14208295	1.02541e-08	0.000429142	0.152219	0.133418	0.0301934	8	14	62034670	LOC101927780	HIF1A (-129669)
	cg16546993	1.02765e-08	0.000430082	-0.0593576	-0.304595	-0.0987846	6	22	26859339	HPS4	HPS4 (+20438)
	cg13532174	1.02844e-08	0.000430412	-0.267376	-0.247756	0.0622003	5	3	197798864	ANKRD18DP	LMLN (+111772)
	cg12488111	1.02892e-08	0.000430611	0.192521	0.216845	0.0306984	8	14	105945699	CRIP2	CRIP2 (+6401)
	cg24960006	1.03227e-08	0.000432016	-0.0860404	-0.242916	-0.0190337	2	1	98262408	DPYD-AS2	DPYD (+124170)
	cg11966136	1.0335e-08	0.00043253	0.161724	0.257102	-0.00755009	8	12	94648248	PLXNC1	PLXNC1 (+105750)
	cg21877274	1.03788e-08	0.000434364	-0.0659088	-0.249637	-0.148715	2	4	139107328	SLC7A11	SLC7A11 (+56174)
	cg06526095	1.04013e-08	0.000435303	0.0125715	0.202093	0.0473713	8	16	17839291		XYLT1 (-274554)
	cg24407670	1.04111e-08	0.000435713	-0.0812491	-0.172094	-0.0875255	4	4	110353560	SEC24B-AS1	SEC24B (-1410)
	cg21201020	1.04112e-08	0.000435719	-0.0339104	-0.316531	-0.0117106	5	8	12885622	KIAA1456	KIAA1456 (+82437)
	cg17504737	1.04125e-08	0.000435774	0.0187411	0.161423	0.0642751	8	1	29805295		PTPRU (+242268)
	cg19651341	1.04253e-08	0.000436309	-0.226392	-0.33505	-0.0190261	6	4	8012338	ABLIM2	AFAP1 (-70686)
	cg01552748	1.04275e-08	0.0004364	-0.000734127	-0.120097	-0.173227	1	13	112225526		TEX29 (+252512)
	cg20003638	1.04344e-08	0.000436692	0.0502397	0.261216	0.0788383	8	20	44687730	SLC12A5	NCOA5 (+30860)
	cg14864196	1.04347e-08	0.000436701	-0.140876	-0.317137	-0.0299796	6	7	105410829	ATXN7L1	ATXN7L1 (+106220)
	cg22699589	1.04434e-08	0.000437066	-0.0160197	-0.152373	-0.115421	4	16	81678705	CMIP	PLCG2 (-134157)
	cg10246640	1.0449e-08	0.000437302	-0.0417294	-0.421076	0.0506088	5	6	134684664		SGK1 (-45469)
	cg00911794	1.04504e-08	0.000437358	0.449125	0.212859	-0.0375512	8	17	1962132	HIC1	HIC1 (+2529)
	cg06871163	1.04529e-08	0.000437466	-0.000389228	-0.0855081	-0.0402077	2	5	159934236		PTTG1 (+85320)
	cg07076109	1.0457e-08	0.000437638	0.234884	0.0932381	0.216993	8	7	4747261	FOXK1	FOXK1 (+25322)
	cg21800177	1.04585e-08	0.0004377	-0.038072	0.212622	0.095333	9	7	21070298		SP8 (-243794)
	cg23096144	1.04761e-08	0.000438435	-0.0743358	-0.190181	-0.101735	2	1	226012954	EPHX1	EPHX1 (-100)
	cg05031236	1.0514e-08	0.000440023	-0.117395	-0.0830581	-0.174465	2	9	135484548	DDX31	BARHL1 (+26977)
	cg04039799	1.05283e-08	0.000440621	-0.0924989	-0.336485	0.0506008	5	11	19745484	NAV2	NAV2 (+10342)
	cg25449593	1.05471e-08	0.000441408	-0.366043	-0.144621	-0.0448898	6	10	112583251	RBM20	PDCD4 (-48313)
	cg23611326	1.05486e-08	0.00044147	-0.150422	-0.230004	-0.189051	4	5	126211278	37681	LMNB1 (+98439)
	cg20866075	1.06016e-08	0.00044369	0.118087	0.194643	0.103453	8	17	77777010		CBX8 (-6096)
	cg01636582	1.06112e-08	0.000444091	0.0639509	0.130926	0.0728154	8	11	844593	TSPAN4	TSPAN4 (+148)
	cg14418633	1.06175e-08	0.000444352	-0.389823	-0.341175	0.0160868	6	1	2005489	PRKCZ	PRKCZ (+23581)
	cg20812378	1.0639e-08	0.000445252	-0.312534	-0.165466	-0.0103047	6	17	77925296	TBC1D16	TBC1D16 (+84350)
	cg06709721	1.06433e-08	0.000445434	-0.026971	-0.274357	-0.0723091	2	11	63858820	MACROD1	FLRT1 (-11839)
	cg11129008	1.06517e-08	0.000445786	-0.0353069	0.127352	0.0251447	9	3	181428647	SOX2OT	SOX2 (-1074)
	cg06159344	1.06621e-08	0.000446221	-0.139957	-0.292077	-0.105371	6	7	2197663	MAD1L1	MAD1L1 (+75214)
	cg23305046	1.06802e-08	0.000446978	-0.00714023	0.178531	0.0878236	9	6	36646245	CDKN1A	CDKN1A (-241)
	cg01340242	1.07081e-08	0.000448143	-0.0440002	-0.276093	-0.17041	1	17	70774806	SLC39A11	SLC39A11 (+314020)
	cg07985679	1.07135e-08	0.000448371	-0.713167	0.13675	0.050695	7	11	115064845	CADM1	CADM1 (+310287)
	cg08506874	1.07197e-08	0.000448629	-0.146341	-0.129039	-0.0843646	4	19	459731	SHC2	SHC2 (+1264)
	cg13676763	1.07199e-08	0.000448638	0.104008	0.292786	0.0744211	8	9	129262204	FAM125B	LMX1B (-114517)
	cg17725605	1.07508e-08	0.000449931	0.0114752	0.150486	0.0653323	9	11	113845825	HTR3A	HTR3A (+29)
	cg24085801	1.07627e-08	0.000450428	-0.244484	-0.203731	-0.0093822	6	12	132943117		FBRSL1 (-123019)
	cg12856377	1.07646e-08	0.00045051	-0.134457	-0.224304	-0.137157	4	2	44773785	CAMKMT	CAMKMT (+184683)
	cg13315721	1.07681e-08	0.000450657	-0.305698	-0.0985621	-0.0145044	4	17	2715785	RAP1GAP2	RAP1GAP2 (+16054)
	cg06275788	1.07995e-08	0.000451971	0.126372	0.0846975	0.0768751	8	10	114592021		TCF7L2 (-117987)
	cg25992330	1.08035e-08	0.000452137	-0.121611	-0.0575467	-0.197189	4	10	73830099	SPOCK2	SPOCK2 (+18431)
	cg13932612	1.08085e-08	0.000452346	0.0341864	0.368255	0.00372825	8	9	23830348		ELAVL2 (-4286)
	cg07091758	1.08408e-08	0.000453697	-0.176314	-0.182489	-0.138941	4	16	81254209	PKD1L2	BCMO1 (-17843)
	cg00808086	1.08577e-08	0.000454405	0.0151266	0.206905	0.0343693	8	16	73098934		ZFHX3 (-16661)
	cg13837962	1.08722e-08	0.00045501	-0.205521	-0.387662	-0.0657436	6	17	63561164		AXIN2 (-3400)
	cg07948769	1.09398e-08	0.000457841	-0.0610844	-0.11188	-0.166375	2	13	33413061	LINC00423	KL (-177509)
	cg09837977	1.09952e-08	0.000460162	-0.406254	-0.114089	-0.0197586	6	7	110731201	LRRN3	LRRN3 (+140)
	cg13358038	1.10035e-08	0.000460509	0.00725592	-0.221061	-0.0342603	1	12	1023702	RAD52	RAD52 (+35185)
	cg11010932	1.10334e-08	0.000461758	-0.0832764	-0.132376	-0.0992545	4	9	127024180	NEK6	NEK6 (+3939)
	cg26662425	1.10631e-08	0.000463001	-0.0499969	0.230423	0.0944428	9	14	99989403	CCDC85C	CCNK (+41658)
	cg00064840	1.10908e-08	0.000464162	-0.0627683	0.185313	0.057471	9	7	4784485	FOXK1	AP5Z1 (-30767)
	cg10626515	1.11163e-08	0.000465229	-0.098927	-0.138868	-0.242358	4	7	25100428		CYCS (+64551)
	cg03001863	1.11248e-08	0.000465584	-0.0893894	-0.251261	-0.0733867	6	20	36037325		SRC (+62769)
	cg17947221	1.11393e-08	0.00046619	-0.100872	-0.295623	-0.0194487	6	1	7641358	CAMTA1	VAMP3 (-189970)
	cg02804231	1.11781e-08	0.000467813	-0.0811056	-0.250794	-0.176111	4	11	113009183	NCAM1	TTC12 (-176067)
	cg25249386	1.11852e-08	0.000468113	0.00791669	0.326894	0.184356	9	14	57272396	OTX2	OTX2 (+4790)
	cg04477203	1.11944e-08	0.000468498	0.0822225	0.208538	0.0440447	8	5	141061883	ARAP3	ARAP3 (-96)
	cg09554993	1.12077e-08	0.000469052	-0.0656449	-0.373649	-0.0451023	4	10	105264267	NEURL1	NEURL1 (+10532)
	cg05534148	1.12128e-08	0.000469268	-0.208377	-0.167048	-0.0923097	6	7	1398159		MICALL2 (+100978)
	cg09738611	1.12159e-08	0.000469396	0.130721	0.244514	0.0616252	8	21	34447840		OLIG1 (+5391)
	cg18425804	1.1238e-08	0.000470322	-0.0320482	-0.288946	-0.0422668	4	14	69765225	GALNT16	GALNT16 (+38545)
	cg25023298	1.12433e-08	0.000470543	0.0861145	0.294747	0.0194428	8	10	77156697		ZNF503 (+4966)
	cg26538442	1.12498e-08	0.000470814	0.0621316	0.228627	0.0727381	8	16	66994947	CES3	CES3 (-192)
	cg05505018	1.12591e-08	0.000471206	0.0680443	-0.132879	-0.24574	1	20	16332088	KIF16B	KIF16B (+221989)
	cg24497732	1.12783e-08	0.000472008	-0.0371376	0.110585	0.0749189	9	7	42278077	GLI3	GLI3 (-1466)
	cg16760981	1.12843e-08	0.000472258	0.235426	0.10314	0.0305151	8	11	63688531		RCOR2 (-4216)
	cg25719507	1.13342e-08	0.000474348	-0.261813	-0.187142	-0.0189745	4	8	17555211	MTUS1	MTUS1 (+102965)
	cg23850277	1.13911e-08	0.000476727	0.0210458	0.131441	0.0619685	9	22	24114770	MMP11	MMP11 (-235)
	cg27413732	1.13951e-08	0.000476897	0.0989235	0.20905	-0.0136298	8	17	27942773	CORO6	CORO6 (+7143)
	cg08547200	1.14018e-08	0.000477178	0.354087	0.149446	0.0274588	8	6	144284774	PLAGL1	PLAGL1 (+5340)	PLAGL1	PLAGL1	PLAGL1	PLAGL1
	cg00410600	1.14087e-08	0.000477464	0.089953	0.241221	0.130332	8	8	145555942	SCRT1	SCRT1 (+4000)
	cg12540792	1.14228e-08	0.000478058	-0.210409	-0.0831455	-0.0350509	4	22	44539678	PARVB	PARVG (-37091)
	cg11391637	1.14412e-08	0.000478826	-0.247049	-0.181337	-0.0709327	4	1	39249315		RRAGC (+76179)
	cg14684255	1.14512e-08	0.000479245	-0.195181	-0.351597	0.113062	5	8	37005684	MIR1268A	KCNU1 (+363793)
	cg16511229	1.14701e-08	0.000480033	0.30564	0.223092	-0.0499016	8	7	130126153	MEST	MEST (-5780)
	cg25678125	1.15103e-08	0.000481716	-0.10511	-0.349267	-0.0858647	6	2	86114676	ST3GAL5	ST3GAL5 (+1460)
	cg10562478	1.15121e-08	0.000481792	0.0238232	0.385112	0.062902	8	3	20115449	KAT2B	KAT2B (+33935)
	cg25956080	1.15191e-08	0.000482087	-0.276082	-0.290965	0.096832	5	22	38276889	EIF3L	MICALL1 (-25414)
	cg13266295	1.15321e-08	0.000482631	-0.0675293	-0.0898257	-0.055372	2	20	36602022		TTI1 (+59840)
	cg23835597	1.15481e-08	0.000483298	-0.0302945	-0.397822	-0.129627	4	15	72598623	CELF6	ENSG00000273025 (+13663)
	cg17298352	1.15673e-08	0.000484105	-0.048534	-0.128791	-0.159479	1	15	86286038	AKAP13	KLHL25 (+52222)
	cg22475139	1.15738e-08	0.000484376	-0.136584	-0.325173	0.00756479	6	1	94558125	ABCA4	ABCA4 (+28562)
	cg04084578	1.15754e-08	0.000484444	-0.14236	-0.289017	0.0711419	5	8	143554635	ADGRB1	BAI1 (+23845)
	cg07018107	1.15926e-08	0.00048516	-0.277408	-0.186784	0.0584716	5	8	129162406	MIR1208	TMEM75 (-201816)
	cg02112681	1.16163e-08	0.000486153	-0.0658844	-0.204022	-0.0802152	6	7	1120141	C7orf50	GPER1 (-6301)
	cg23594198	1.16886e-08	0.000489178	-0.0590549	-0.126852	-0.0949296	2	2	45121446		SIX3 (-47455)
	cg02999711	1.16914e-08	0.000489298	0.330103	0.236666	0.0155893	8	1	205417436	MIR135B	LEMD1 (-26255)
	cg07368728	1.1709e-08	0.000490033	-0.267145	-0.315797	-0.072072	6	14	75704448		FOS (-41028)
	cg00351554	1.17319e-08	0.000490992	-0.459553	-0.142688	-0.00751989	4	17	210047		RPH3AL (-7450)
	cg13011388	1.17425e-08	0.000491436	0.0020193	0.115122	0.0443623	8	14	23834909	EFS	EFS (-68)
	cg12684999	1.17556e-08	0.000491984	-0.239144	-0.0691887	-0.141094	4	2	161099777		ITGB6 (-42966)
	cg17588800	1.17691e-08	0.000492548	0.000414901	0.131069	0.0687588	9	7	42278067	GLI3	GLI3 (-1456)
	cg11805664	1.17781e-08	0.000492926	-0.0570751	-0.1513	-0.126503	4	2	8156001	LINC00299	ID2 (-662973)
	cg12406072	1.18088e-08	0.000494211	-0.00743809	-0.175537	-0.098425	4	16	17497905	XYLT1	XYLT1 (+66832)
	cg26723847	1.18191e-08	0.000494642	-0.117309	-0.110357	-0.033157	2	11	134095652	VPS26B	VPS26B (+1114)
	cg04636402	1.18194e-08	0.000494654	0.152136	0.184297	0.0782584	8	5	139284774	NRG2	PSD2 (+109369)
	cg19869369	1.18395e-08	0.000495495	-0.118534	-0.153729	-0.130598	4	15	64995934	OAZ2	OAZ2 (-455)
	cg07533819	1.18477e-08	0.00049584	0.0189596	-0.312376	-0.0813623	1	5	71407465	MAP1B	MAP1B (+4405)
	cg13518824	1.18503e-08	0.000495947	0.0140024	-0.292589	-0.0678542	1	1	8523537	RERE	SLC45A1 (+145652)
	cg18093064	1.18921e-08	0.000497698	-0.154412	-0.154942	-0.0420609	6	11	63886229	FLRT1	FLRT1 (+15570)
	cg06539924	1.18929e-08	0.000497728	0.122756	0.132369	0.0656478	8	12	6167147	VWF	VWF (+66693)
	cg13831596	1.19221e-08	0.000498951	-0.0179734	-0.172287	-0.297467	1	13	52531863	ATP7B	ATP7B (+53766)
	cg21777553	1.19502e-08	0.000500127	-0.119928	-0.218764	-0.0126671	4	2	208028218	KLF7	KLF7 (+2450)
	cg00887633	1.19636e-08	0.000500688	-0.200872	-0.0862375	-0.0479901	4	3	64202311	PRICKLE2	PRICKLE2 (+8819)
	cg14698880	1.1965e-08	0.000500745	0.19785	0.172751	0.00928425	8	15	57770584	CGNL1	CGNL1 (+101882)
	cg05940678	1.19958e-08	0.000502035	-0.195237	-0.176456	-0.0780955	4	1	198500240	ATP6V1G3	ATP6V1G3 (+9834)
	cg17000076	1.20032e-08	0.000502347	-0.120324	-0.230815	0.0845115	5	10	1780263	ADARB2	ADARB2 (-594)
	cg24134332	1.20065e-08	0.000502484	-0.106781	-0.176425	-0.0212573	5	3	52445584	PHF7	PHF7 (+912)
	cg00509136	1.20098e-08	0.00050262	0.0705002	0.0909981	0.0556361	8	19	50141490	RRAS	RRAS (+1967)
	cg16557172	1.2067e-08	0.000505015	-0.152378	-0.0848829	-0.21318	4	1	229896511		URB2 (+134531)
	cg21144735	1.20944e-08	0.000506162	0.00910124	-0.381116	-0.157995	4	14	77533057	LOC283575	CIPC (-31382)
	cg09328979	1.21359e-08	0.0005079	0.166047	0.296424	-0.0529144	8	16	88700622		IL17C (-4378)
	cg22688137	1.21714e-08	0.000509386	-0.253776	0.0280504	-0.114192	4	1	218633498	MIR548F3	TGFB2 (+113922)
	cg23245620	1.21795e-08	0.000509724	0.0164704	0.223443	0.0263593	8	2	45172972	SIX3	SIX3 (+4071)
	cg03542225	1.2226e-08	0.00051167	0.128183	0.174508	0.0234018	8	1	202649985	SYT2	SYT2 (-37405)
	cg17517367	1.22276e-08	0.000511737	-0.106036	-0.122786	-0.157435	4	5	12016460		CTNND2 (-112306)
	cg27642512	1.22442e-08	0.000512433	-0.195472	-0.102961	-0.0451999	4	16	29909434	SEZ6L2	SEZ6L2 (+1433)
	cg11073717	1.22446e-08	0.000512449	0.231254	0.125133	0.0700987	8	20	34658438		EPB41L1 (-84233)
	cg18201277	1.22939e-08	0.00051451	-0.308434	-0.129317	-0.0116899	4	11	13461782	BTBD10	BTBD10 (+23044)
	cg10337975	1.23106e-08	0.000515213	-0.279227	-0.120217	-0.0109799	4	7	5676855	RNF216	FSCN1 (+44402)
	cg27354317	1.2312e-08	0.000515269	-0.077729	-0.156974	-0.0466008	2	8	107592181	OXR1	OXR1 (+132030)
	cg27288272	1.23799e-08	0.000518111	-0.104629	-0.231723	-0.0316191	5	2	230933723	SLC16A14	SLC16A14 (-9)
	cg14607332	1.24082e-08	0.000519294	-0.082672	-0.311946	-0.124219	4	1	8658322	RERE	RERE (+219201)
	cg06947811	1.24102e-08	0.000519381	-0.0539468	-0.221048	-0.0361771	4	1	113617001	LOC100996251	LRIG2 (+1171)
	cg01184930	1.243e-08	0.000520209	-0.140393	-0.372356	0.0132519	4	7	140776502	TMEM178B	TMEM178B (+2471)
	cg06429507	1.24457e-08	0.000520863	0.00120836	-0.180354	-0.133896	2	9	82677132		TLE4 (+490445)
	cg16843162	1.24529e-08	0.000521167	0.161241	0.107719	0.0365276	8	11	17085300		RPS13 (+14033)
	cg00386007	1.24791e-08	0.000522265	-0.262543	-0.11814	-0.087209	4	10	50143337	WDFY4	LRRC18 (-21061)
	cg16509830	1.2485e-08	0.000522511	-0.00850971	0.103149	0.0925643	9	3	71354948	FOXP1	FOXP1 (-174961)
	cg11138596	1.25236e-08	0.000524125	-0.08428	-0.309798	-0.125972	4	21	43846785	UBASH3A	UBASH3A (+22762)
	cg01558645	1.2526e-08	0.000524224	-0.298954	-0.200133	-0.0185879	6	4	71587904	RUFY3	RUFY3 (+193)
	cg11809339	1.2548e-08	0.000525148	0.0367768	-0.268276	-0.00849854	3	8	20159382		LZTS1 (+2091)
	cg07212818	1.25638e-08	0.000525808	0.0416581	0.190042	0.00869492	8	11	638076	DRD4	DRD4 (+784)
	cg06604227	1.25841e-08	0.000526656	0.0106499	0.170833	0.0733669	9	1	11696093		FBXO2 (+18645)
	cg18412889	1.25871e-08	0.000526783	0.0970524	0.129682	0.00980464	8	11	67788125	ALDH3B1	NDUFS8 (-9968)
	cg27274542	1.26131e-08	0.000527873	0.166261	0.198581	0.0103681	8	20	57267680	NPEPL1	NPEPL1 (+12)
	cg24756531	1.26212e-08	0.000528209	-0.0980405	-0.112225	-0.0905164	4	20	46937828		PREX1 (+506591)
	cg23092176	1.26431e-08	0.000529126	0.0261333	-0.140952	-0.166282	1	11	69813451		ANO1 (-110956)
	cg05981794	1.26557e-08	0.000529654	-0.0315185	-0.375148	-0.0372477	2	16	57872386		KIFC3 (-35887)
	cg12561659	1.26613e-08	0.000529886	-0.116833	-0.187548	-0.013254	6	19	14062718	DCAF15	DCAF15 (-585)
	cg03096975	1.26646e-08	0.000530024	-0.00702739	0.240645	0.076585	9	19	46142574	MIR330	EML2 (+6312)
	cg02261844	1.26658e-08	0.000530076	-0.0777408	-0.467779	-0.0451744	6	15	72456317	GRAMD2	GRAMD2 (+33808)
	cg06613285	1.26772e-08	0.000530552	-0.223605	-0.0224859	-0.0776485	4	4	99417477	TSPAN5	TSPAN5 (+162302)
	cg10984625	1.269e-08	0.000531091	0.0534859	0.277491	0.0638562	8	2	238599858	LRRFIP1	LRRFIP1 (-1123)
	cg25313954	1.26994e-08	0.000531482	-0.0209788	-0.068372	-0.06744	2	10	36188170		FZD8 (-257809)
	cg13363829	1.27062e-08	0.000531766	0.204085	0.13336	0.0157105	8	3	9958869	IL17RC	IL17RC (+88)
	cg23475294	1.27111e-08	0.000531974	0.126869	0.193681	0.0720191	8	1	154581658	ADAR	ADAR (-977)
	cg27129922	1.27446e-08	0.000533375	-0.0981289	-0.204957	-0.0343246	2	6	30690346	TUBB	TUBB (+2369)
	cg01135464	1.27815e-08	0.000534918	-0.257059	-0.337495	0.0795702	5	17	48971001		TOB1 (-27296)
	cg02675621	1.27908e-08	0.000535309	-0.140222	-0.300059	0.0216733	5	10	130711019		MGMT (-554428)
	cg06966839	1.28313e-08	0.000537005	0.25708	0.184081	-0.0514453	8	17	55685941	MSI2	CCDC182 (+136731)
	cg27032492	1.28335e-08	0.000537095	-0.0988309	-0.197504	-0.0156353	5	14	79435955	NRXN3	NRXN3 (+565863)
	cg23085466	1.28997e-08	0.000539865	0.0451423	-0.145281	-0.276828	1	1	165870331	UCK2	UCK2 (+73564)
	cg00950497	1.2902e-08	0.00053996	-0.0756851	-0.350623	0.00680072	4	10	116393423	ABLIM1	ABLIM1 (+24633)
	cg14660163	1.29351e-08	0.000541349	0.0372576	-0.181538	-0.28116	1	2	161150008	RBMS1	ITGB6 (-93197)
	cg14028515	1.29861e-08	0.00054348	0.090467	0.13699	0.0797862	8	17	43510310	ARHGAP27	ARHGAP27 (-7314)
	cg23912509	1.29908e-08	0.000543679	-0.00260062	-0.0907215	-0.0876197	1	12	97957406	MIR135A2	NEDD1 (+656163)
	cg15852490	1.30924e-08	0.000547932	-0.0689532	-0.36889	0.0670108	5	6	37544545		CCDC167 (-76848)
	cg26993674	1.31341e-08	0.000549676	-0.3029	-0.160442	-0.00405884	4	14	90958106		CALM1 (+94780)
	cg07881032	1.31378e-08	0.000549828	-0.0493606	-0.0894966	-0.102693	4	9	102059051		SEC61B (+74469)
	cg16083838	1.31671e-08	0.000551056	-0.0247803	0.229052	0.130674	9	11	2889809	KCNQ1DN	CDKN1C (+17301)
	cg03803818	1.31742e-08	0.000551353	-0.427131	-0.0657114	-0.0551644	4	12	110637414	IFT81	IFT81 (+75233)
	cg08437662	1.32159e-08	0.000553101	-0.0510592	-0.117011	-0.112108	2	7	139609665	TBXAS1	TBXAS1 (+80714)
	cg04451736	1.32355e-08	0.000553918	0.14097	0.195744	-0.0105228	8	5	10333413		MARCH6 (-20465)
	cg05999978	1.32359e-08	0.000553934	0.0232147	-0.160706	-0.229411	1	17	52989		DOC2B (-21563)
	cg04353536	1.32593e-08	0.000554914	-0.106852	-0.163566	-0.0412627	4	18	33059357	INO80C	ENSG00000267140 (+18546)
	cg13945880	1.32733e-08	0.000555503	-0.318752	-0.14673	0.00643112	6	5	171008055		FGF18 (+161396)
	cg26082587	1.33189e-08	0.00055741	0.102826	0.390871	-0.0063897	8	4	40632839	RBM47	RBM47 (-116065)
	cg25451958	1.33208e-08	0.000557489	0.068318	0.210823	0.0257413	8	8	24859074		NEFM (+88550)
	cg16504278	1.33213e-08	0.000557508	-0.0567272	-0.14883	-0.175933	2	16	11199143	CLEC16A	SOCS1 (+150892)
	cg23857915	1.33263e-08	0.000557718	-0.050779	0.205507	0.073329	9	14	57281218	OTX2-AS1	OTX2 (-4032)
	cg07954334	1.33299e-08	0.00055787	-0.0638078	-0.18324	-0.21659	2	17	80540367	FOXK2	FOXK2 (+62777)
	cg07537417	1.33776e-08	0.000559865	0.0176658	0.172978	0.0777629	8	18	74332553		ZNF516 (-125408)
	cg07719684	1.33951e-08	0.000560597	-0.396017	-0.184818	-0.01979	6	12	132943092		FBRSL1 (-123044)
	cg14075393	1.33972e-08	0.000560687	0.0085323	0.1101	0.0860905	9	13	26485570	ATP8A2	SHISA2 (+139598)
	cg16720678	1.34002e-08	0.00056081	-0.396649	-0.181719	0.0038212	6	17	210096		RPH3AL (-7499)
	cg19448587	1.34051e-08	0.000561018	-0.231706	-0.180104	0.0625394	5	12	31556147	DENND5B	FAM60A (-76842)
	cg09097524	1.34168e-08	0.000561507	-0.0958979	-0.0961159	-0.128064	4	2	39970839	THUMPD2	THUMPD2 (+35567)
	cg07890032	1.3428e-08	0.000561977	-0.110876	-0.18501	-0.0675709	4	2	11605744	E2F6	E2F6 (+530)
	cg20994225	1.34643e-08	0.000563493	0.000924492	-0.110473	-0.187969	1	12	81568596	ACSS3	ACSS3 (+97607)
	cg22436429	1.35063e-08	0.000565254	0.0404932	0.257513	0.0104813	8	1	36043084	TFAP2E	TFAP2E (+4114)
	cg16419724	1.35533e-08	0.000567221	0.222654	0.361481	-0.0503902	8	5	68711519	MARVELD2	MARVELD2 (+581)
	cg09757588	1.36002e-08	0.00056918	-0.0296885	-0.163803	5.19447e-05	3	2	1418028	TPO	TPO (+796)
	cg15627993	1.36041e-08	0.000569345	-0.0988699	-0.205729	-0.164784	4	18	13628426	LDLRAD4	FAM210A (+98132)
	cg10781849	1.36871e-08	0.000572821	-0.457363	-0.134871	-0.03973	6	14	104845338		C14orf144 (+134798)
	cg08451219	1.37075e-08	0.000573673	0.0805353	0.0640586	0.0636199	8	12	53441550	TNS2	TENC1 (-1182)
	cg15663074	1.37194e-08	0.000574171	-0.0981196	-0.470943	0.0573649	5	5	134582868		H2AFY (+152443)
	cg17517442	1.37311e-08	0.000574658	-0.0189874	-0.150732	-0.159633	1	8	144521470	ZC3H3	MAFA (-8895)
	cg17459182	1.37441e-08	0.000575206	-0.215455	-0.0997132	-0.0231759	4	2	241866514		AGXT (+58619)
	cg04047186	1.37705e-08	0.00057631	0.0521809	0.119297	0.0448652	8	7	100662031	LOC102724094	MUC17 (-1321)
	cg26219279	1.3787e-08	0.000576998	-0.0701341	-0.0886651	-0.168795	2	4	174667707		HAND2 (-216328)
	cg17452301	1.38022e-08	0.000577636	-0.147343	-0.156411	-0.0380713	4	10	134211620	PWWP2B	PWWP2B (+949)
	cg05871101	1.38521e-08	0.000579723	0.0258563	-0.20269	-0.062732	1	1	143998935		FAM72D (-85793)
	cg09452728	1.3897e-08	0.000581604	-0.0627964	-0.265345	0.086446	5	11	133902108	LOC100128239	JAM3 (-36711)
	cg09583267	1.39085e-08	0.000582084	0.0181913	-0.283481	-0.180681	1	12	132349953		ULK1 (-29242)
	cg20115037	1.39148e-08	0.000582347	0.244509	0.139565	0.0368623	8	1	204049586	SOX13	SOX13 (+6855)
	cg09709600	1.39364e-08	0.000583251	0.0418813	0.32185	0.13299	9	11	65359521	EHBP1L1	KCNK7 (+3945)
	cg04819760	1.3965e-08	0.000584447	0.0253471	0.130052	0.0801761	9	10	22765645		SPAG6 (+131247)
	cg23131493	1.39818e-08	0.000585151	-0.223566	-0.231667	-0.175285	4	3	194101309		LRRC15 (-17211)
	cg07394566	1.39825e-08	0.000585182	0.0307658	0.109581	0.126894	9	5	158479660	EBF1	EBF1 (+47108)
	cg19369070	1.39851e-08	0.000585292	0.00675548	0.22107	0.0471229	8	10	114715786	TCF7L2	TCF7L2 (+5778)
	cg21637392	1.39867e-08	0.000585358	0.0235921	-0.349538	-0.211925	1	7	5735123	RNF216	RNF216 (+86246)
	cg19297251	1.40263e-08	0.000587016	-0.249144	-0.0547162	-0.0751328	4	10	10504287	LOC101928322	CELF2 (-555605)
	cg00414717	1.40447e-08	0.000587783	-0.276486	-0.177827	-0.0424841	6	1	230699458		COG2 (-78779)
	cg24669906	1.40519e-08	0.000588086	-0.114556	-0.160043	-0.0137533	6	9	38424717	IGFBPL1	IGFBPL1 (-274)
	cg22839447	1.40523e-08	0.000588104	-0.131686	-0.0532767	-0.21866	2	17	10561350	MYH3	MYH3 (-725)
	cg09705456	1.40638e-08	0.000588586	-0.0143824	-0.124914	-0.147885	1	11	63839479	MACROD1	FLRT1 (-31180)
	cg09675295	1.40653e-08	0.000588646	-0.0249074	-0.121709	-0.0849999	2	4	1352170	UVSSA	UVSSA (+11067)
	cg15853812	1.40993e-08	0.000590068	0.162354	0.189782	0.129293	8	17	7757994	KDM6B	TMEM88 (-388)
	cg11431126	1.41515e-08	0.000592255	-0.193224	-0.139177	-0.0235723	6	1	228870709	RHOU	RHOU (-114)
	cg26157361	1.41833e-08	0.000593586	-0.0140779	-0.359321	0.0132376	3	3	105434386	CBLB	CBLB (+153500)
	cg10663765	1.42408e-08	0.000595991	-0.0125116	0.160024	0.166854	9	3	194014592		CPN2 (+57464)
	cg13242768	1.4248e-08	0.000596294	-0.133972	-0.265194	-0.0739931	4	4	58290665	LOC101928851	IGFBP7 (-314115)
	cg18792803	1.42586e-08	0.000596735	0.170321	0.298908	0.06432	8	13	110919641	COL4A1	COL4A1 (+39854)
	cg22637898	1.43097e-08	0.000598876	0.143697	0.123504	0.0367929	8	3	122794312	PDIA5	PDIA5 (+8396)
	cg16509777	1.4383e-08	0.000601944	-0.043149	0.194035	0.0648141	9	2	45172265	SIX3	SIX3 (+3364)
	cg23960652	1.439e-08	0.000602237	-0.358079	-0.147159	-0.0656674	4	1	114557997		OLFML3 (+35933)
	cg08940570	1.44059e-08	0.000602901	0.0727512	0.0943166	0.13185	8	2	74780617	LOXL3	LOXL3 (+444)
	cg07161181	1.44095e-08	0.000603051	-0.106933	-0.198258	-0.0311871	6	2	217291644	SMARCAL1	SMARCAL1 (+14508)
	cg02546829	1.44247e-08	0.00060369	-0.311556	-0.0927163	-0.0352862	4	5	16427900	LOC101929505	ZNF622 (+38000)
	cg24771804	1.44955e-08	0.000606653	-0.0182802	0.20665	0.0468667	9	18	55107755	ONECUT2	ONECUT2 (+4839)
	cg07439128	1.44997e-08	0.000606829	-0.0128888	0.278502	0.126156	9	11	2890019	KCNQ1DN	CDKN1C (+17091)
	cg22865769	1.45007e-08	0.000606868	-0.0455218	-0.268219	-0.0783258	4	7	99835209	GATS	PVRIG (+18351)
	cg14628799	1.45183e-08	0.000607607	-0.147466	-0.0823056	-0.115184	4	20	31168304	NOL4L	ENSG00000204393 (-6976)
	cg16313227	1.45231e-08	0.000607804	-0.0305659	0.223592	0.0520691	9	11	638974	DRD4	DRD4 (+1682)
	cg26785604	1.45431e-08	0.000608644	-0.0386282	-0.222068	-0.27018	1	4	3409168	RGS12	HGFAC (-34445)
	cg18899569	1.45465e-08	0.000608783	0.00152579	0.0871071	0.060034	9	11	2884145		CDKN1C (+22965)
	cg26726340	1.45468e-08	0.000608798	-0.0329119	-0.18084	-0.151046	2	17	77881721		CBX4 (-68494)
	cg04285141	1.45791e-08	0.00061015	-0.0674763	-0.451336	-0.0518019	3	16	57872427		KIFC3 (-35928)
	cg20510687	1.46092e-08	0.000611412	0.154759	0.103816	0.0372843	8	20	32461198		CHMP4B (+62089)
	cg11078128	1.46156e-08	0.000611677	-0.0117838	-0.495984	-0.111542	3	1	6336743	ACOT7	GPR153 (-15709)
	cg01460436	1.46318e-08	0.000612357	-0.0278444	0.169582	0.0453117	9	20	44687454	SLC12A5	NCOA5 (+31136)
	cg11458409	1.46397e-08	0.000612687	-0.0149612	-0.298149	-0.0921741	4	20	35487162	SOGA1	SOGA1 (+4926)
	cg05863683	1.46569e-08	0.000613407	0.00350658	-0.192874	-0.212689	1	7	1912471	MAD1L1	ELFN1 (+184717)
	cg16584355	1.46785e-08	0.000614311	-0.31125	-0.15468	0.0740411	5	20	4083087		SMOX (-46338)
	cg22795877	1.47172e-08	0.000615931	-0.21181	-0.0683824	-0.0563744	4	1	182641338	RGS8	RGS8 (+710)
	cg11298317	1.47704e-08	0.000618157	-0.17203	-0.294592	-0.0983596	6	10	123928264	TACC2	BTBD16 (-102556)
	cg03977390	1.4811e-08	0.000619854	-0.0908279	-0.179445	-0.157304	4	12	79193846		SYT1 (-64602)
	cg26031499	1.48288e-08	0.000620601	-0.0356063	0.303603	0.0456157	9	12	56334563	DGKA	DGKA (+9808)
	cg01458646	1.48872e-08	0.000623046	-0.392394	0.015287	-0.124241	4	6	32171330	NOTCH4	GPSM3 (-10648)
	cg13038618	1.4892e-08	0.000623244	-0.0690292	-0.118894	-0.21592	4	14	77467391		IRF2BPL (+27642)
	cg21006277	1.49124e-08	0.000624097	-0.00475529	-0.213306	-0.28003	1	22	42829824	NFAM1	NFAM1 (-1424)
	cg22033804	1.49247e-08	0.000624613	-0.10384	-0.294438	0.0557043	5	10	84573754	NRG3	NRG3 (+938685)
	cg17052537	1.49378e-08	0.00062516	-0.0146914	-0.16056	-0.262242	1	12	3738922	CRACR2A	EFCAB4B (+123345)
	cg03402373	1.49462e-08	0.000625513	0.00683085	-0.200611	-0.135133	1	2	212989562	ERBB4	ERBB4 (+414002)
	cg25172243	1.50072e-08	0.000628067	-0.0475879	-0.111615	-0.0807914	4	X	138724688	MCF2	MCF2 (+65697)
	cg14947478	1.50087e-08	0.000628128	-0.301683	-0.178302	-0.0402877	4	20	34025962	GDF5	GDF5OS (+5136)
	cg21436971	1.50442e-08	0.000629616	0.166709	0.204035	0.00975466	8	5	107145270		EFNA5 (-138675)
	cg23095148	1.50444e-08	0.000629622	-0.138123	-0.249507	-0.134112	4	20	36931523	BPI	BPI (-1001)
	cg12523770	1.50448e-08	0.00062964	-0.592603	0.165208	-0.0550305	7	2	136864893		CXCR4 (+8919)
	cg07141504	1.50509e-08	0.000629894	-0.107131	-0.143164	0.0467663	5	3	194030706	LOC100131551	CPN2 (+41350)
	cg15138473	1.50591e-08	0.000630238	0.103373	-0.237598	-0.171737	1	6	83757182	UBE2CBP	UBE3D (+18377)
	cg04988367	1.51421e-08	0.000633711	-0.0567477	-0.187748	-0.119571	4	5	10933006		DAP (-171623)
	cg01844757	1.51488e-08	0.000633993	-0.267231	-0.0875303	-0.104091	4	5	112420653	MCC	DCP2 (+108221)
	cg10198479	1.51507e-08	0.000634072	0.000767839	0.198068	0.0983799	9	16	85268435		FAM92B (-122322)
	cg05338847	1.52026e-08	0.000636244	0.0341138	-0.402952	-0.0250134	3	10	123914355	TACC2	BTBD16 (-116465)
	cg03707974	1.52036e-08	0.000636287	0.151561	0.121633	-0.00704824	8	6	108444920		NR2E1 (-42341)
	cg15410789	1.52258e-08	0.000637214	0.0160084	0.273545	0.111711	9	19	47157945	DACT3	DACT3 (+6449)
	cg19625325	1.52561e-08	0.000638485	-0.0581944	-0.270416	-0.112596	2	17	75072780		SEC14L1 (-12050)
	cg10596451	1.52772e-08	0.000639368	0.034034	0.166209	0.1647	9	2	182549368		NEUROD1 (-3766)
	cg10682560	1.53238e-08	0.000641316	0.309778	0.108623	0.0628028	8	11	31845148		PAX6 (-5640)
	cg08941107	1.53254e-08	0.000641382	-0.0744613	-0.14801	-0.0526648	4	1	27744956	WASF2	GPR3 (+25809)
	cg16034168	1.53263e-08	0.000641422	-0.0198579	-0.681848	-0.0703374	6	1	6336711	ACOT7	GPR153 (-15677)
	cg11745881	1.53556e-08	0.000642647	0.0021798	-0.389735	0.00316249	3	3	67353154		KBTBD8 (+304424)
	cg04549524	1.53632e-08	0.000642965	0.00327368	-0.15237	-0.199883	1	10	134511968	INPP5A	NKX6-2 (+87587)
	cg26404745	1.53932e-08	0.000644219	0.129504	0.0911634	0.0525827	8	17	4853717	PFN1	ENO3 (-672)
	cg23090897	1.53964e-08	0.000644353	-0.385429	-0.179708	0.00706814	6	5	26553385		CDH9 (+485307)
	cg04607334	1.54039e-08	0.000644667	0.0211266	0.333049	0.141088	9	17	27568523		CRYBA1 (-5357)
	cg08049603	1.54305e-08	0.000645784	-0.077557	-0.167152	-0.0334048	2	12	111211001		PPP1CC (-30258)
	cg16617372	1.54406e-08	0.000646206	-0.139733	-0.166616	-0.0574979	4	12	121199483		ACADS (+35946)
	cg01420159	1.54613e-08	0.000647069	-0.418138	-0.148781	-0.0337912	4	16	85335889		FAM92B (-189776)
	cg22954828	1.54763e-08	0.000647697	-0.126116	-0.232992	0.050439	5	X	9880903	SHROOM2	ENSG00000234469 (-54488)
	cg14811472	1.5535e-08	0.000650157	-0.235555	-0.0865879	-0.0619978	4	1	33804213	PHC2	A3GALT2 (-17515)
	cg16429748	1.55798e-08	0.000652032	-0.281118	-0.123285	-0.0829419	6	14	72170517	SIPA1L1	SIPA1L1 (+174476)
	cg03038548	1.55826e-08	0.000652146	0.127813	0.113482	0.159792	8	9	124049158	GSN-AS1	GSN (-12912)
	cg10932939	1.55837e-08	0.000652192	-0.116162	-0.0290056	-0.136797	4	5	153466023		MFAP3 (+47505)
	cg27051147	1.55877e-08	0.000652362	-0.0667775	-0.123932	-0.182031	2	X	130352246		IGSF1 (+71156)
	cg14978135	1.56205e-08	0.000653735	-0.00796	-0.0999779	-0.109916	1	11	117237349	CEP164	CEP164 (+38779)
	cg02963000	1.5626e-08	0.000653964	0.102714	0.100482	0.0129075	8	17	75731360		TNRC6C (-269776)
	cg06700964	1.56564e-08	0.000655238	0.0807755	-0.221334	-0.0640596	1	7	30066941	PLEKHA8	FKBP14 (-642)
	cg02011864	1.56632e-08	0.000655522	-0.097412	-0.0610127	-0.194085	2	12	22882041		ETNK1 (+104033)
	cg00244517	1.56758e-08	0.000656048	0.288657	0.13828	-0.0404291	8	4	57371467	ARL9	ARL9 (-41)
	cg11488864	1.56762e-08	0.000656065	0.0270253	-0.120635	-0.130895	1	4	8379238	ACOX3	ACOX3 (+63199)
	cg09019635	1.56939e-08	0.000656807	-0.173684	0.443454	0.0878571	9	2	164800141		FIGN (-207625)
	cg07727358	1.57171e-08	0.000657778	-0.00237586	0.43564	0.156011	9	4	1008738	FGFRL1	FGFRL1 (+4972)
	cg05688764	1.57394e-08	0.000658709	-0.0499488	-0.260123	0.00540761	5	19	4588433		SEMA6B (-28614)
	cg05241277	1.5794e-08	0.000660994	0.0774448	0.197738	0.0106967	8	4	154711519	SFRP2	SFRP2 (-1248)
	cg02848389	1.58226e-08	0.000662192	-0.00435639	-0.148974	-0.18835	4	4	10626874	CLNK	CLNK (+59614)
	cg26643039	1.58706e-08	0.0006642	0.0350583	-0.132577	-0.109986	1	14	70141887	SUSD6	SRSF5 (-51729)
	cg04304121	1.59138e-08	0.00066601	0.0266939	-0.156275	-0.0958816	1	2	29236134	FAM179A	C2orf71 (+60992)
	cg00657763	1.59275e-08	0.00066658	0.0571868	-0.129542	-0.315319	1	8	52319298	PXDNL	PXDNL (+402706)
	cg17784744	1.59311e-08	0.000666734	-0.0325333	-0.101724	-0.0816333	2	17	30433650		RHOT1 (-35834)
	cg10254923	1.59344e-08	0.00066687	-0.0593392	-0.173016	0.0120181	5	16	769848	FAM173A	FAM173A (-1126)
	cg22335692	1.59356e-08	0.000666919	-0.0100613	0.160384	0.15657	9	19	34258947	CHST8	KCTD15 (-30343)
	cg24991963	1.59361e-08	0.000666941	-0.14631	-0.11796	-0.0463896	4	14	35854975		NFKBIA (+18976)
	cg08403428	1.60119e-08	0.000670114	0.00249545	-0.137841	-0.0767188	2	12	124899777	NCOR2	NCOR2 (+80020)
	cg11346124	1.60251e-08	0.000670668	0.036888	-0.270978	-0.0553165	1	6	150614809		IYD (-75218)
	cg04349855	1.6046e-08	0.000671543	-0.0450637	-0.112639	-0.137139	4	13	114842706	RASA3	RASA3 (+55379)
	cg26474010	1.60644e-08	0.000672309	-0.182819	-0.25631	-0.0375134	6	16	87470156	ZCCHC14	MAP1LC3B (+44751)
	cg15924686	1.6068e-08	0.000672462	-0.0583554	-0.162518	-0.161768	4	6	14167268		CD83 (+49397)
	cg04287416	1.61364e-08	0.000675323	-0.0329432	-0.173983	-0.122498	1	3	156817278	LINC00881	CCNL1 (+60723)
	cg02425445	1.61591e-08	0.000676274	-0.0141911	-0.417177	0.0780384	5	16	23962472	PRKCB	PRKCB (+115128)
	cg25934166	1.62098e-08	0.000678396	-0.0221519	-0.467854	-0.14191	4	8	110098836	TRHR	TRHR (-13)
	cg26198748	1.62173e-08	0.000678712	0.0278336	-0.254149	-0.131817	1	3	111757941	TMPRSS7	TMPRSS7 (-611)
	cg25202269	1.6255e-08	0.000680287	0.0352225	0.199051	0.0358407	8	1	7022135	CAMTA1	CAMTA1 (+176752)
	cg00067751	1.62831e-08	0.000681466	-0.0331718	-0.150868	-0.0203489	2	9	104249741	TMEM246	TMEM246 (+45988)
	cg17367108	1.63393e-08	0.000683814	-0.197176	-0.308746	-0.0166086	6	1	7598255	CAMTA1	VAMP3 (-233073)
	cg00275665	1.63441e-08	0.000684016	-0.0882076	-0.285123	-0.0678033	4	20	48317973	B4GALT5	B4GALT5 (+12441)
	cg04066903	1.6352e-08	0.000684348	-0.179904	-0.165872	-0.0189067	6	12	109957213	UBE3B	UBE3B (+41767)
	cg05085782	1.63792e-08	0.000685488	-0.0449883	-0.195758	-0.094599	2	2	210636188	UNC80	UNC80 (-528)
	cg01330096	1.64269e-08	0.00068748	0.101248	0.226351	0.00630747	8	13	112713372		SOX1 (-8540)
	cg05748342	1.64277e-08	0.000687515	-0.0328157	-0.115035	-0.18683	2	3	51721635	TEX264	TEX264 (+16365)
	cg13709618	1.6433e-08	0.000687736	0.0832945	0.281855	0.059444	8	1	35350879	DLGAP3	SMIM12 (-25463)
	cg17732589	1.64873e-08	0.000690011	-0.270159	-0.256602	0.0661223	5	1	100137707	PALMD	PALMD (+26209)
	cg05290065	1.65039e-08	0.000690706	-0.00194766	-0.344537	-0.112178	1	12	123509672	PITPNM2	ABCB9 (-43477)
	cg09369521	1.65039e-08	0.000690706	-0.305509	0.0206044	-0.130414	4	14	74608625	LIN52	LIN52 (+57127)
	cg22733910	1.65142e-08	0.000691137	-0.13147	-0.112218	-0.0370095	6	1	66257553	PDE4B	PDE4B (-643)
	cg02828441	1.65353e-08	0.000692019	-0.0863724	-0.321077	-0.169277	4	3	62215150	PTPRG	FEZF2 (+144039)
	cg02936315	1.65456e-08	0.000692449	-0.152164	-0.115083	-0.108745	2	7	1250239		UNCX (-22303)
	cg18107144	1.66038e-08	0.000694885	0.141127	0.105279	0.00917712	8	1	32042157	TINAGL1	TINAGL1 (+22)
	cg03004619	1.66052e-08	0.000694945	-0.292154	-0.203801	-0.0529963	6	2	232173822	ARMC9	B3GNT7 (-86431)
	cg20947259	1.66588e-08	0.000697186	-0.0069395	-0.379446	-0.0964498	2	1	201572159		NAV1 (-45217)
	cg12451837	1.6667e-08	0.000697533	-0.165726	-0.303654	0.0353618	5	10	35119627		PARD3 (-15379)
	cg15311897	1.67138e-08	0.000699489	-0.0728705	-0.0656922	-0.0639113	4	6	154598261	IPCEF1	IPCEF1 (+52953)
	cg27080986	1.67566e-08	0.000701279	-0.259183	-0.205355	0.0531613	5	4	8396300	ACOX3	ACOX3 (+46137)
	cg02416424	1.68189e-08	0.000703889	0.140972	0.139389	0.0828094	8	17	39684825	KRT19	KRT19 (-266)
	cg22664129	1.68197e-08	0.00070392	-0.0963085	-0.147677	-0.028599	2	8	29580758	LINC00589	TMEM66 (+359964)
	cg01875093	1.6826e-08	0.000704186	-0.0509398	-0.205382	-0.139484	2	4	101712440		EMCN (-273191)
	cg13184736	1.68336e-08	0.000704501	0.318073	0.179636	-0.0361828	8	1	68299409	GNG12	GNG12 (-260)
	cg10753966	1.6857e-08	0.000705482	0.241313	0.13751	0.0305206	8	3	55556197	ERC2	WNT5A (-32225)
	cg16746567	1.68775e-08	0.000706339	0.130573	0.250568	0.0688079	8	3	32881825	TRIM71	TRIM71 (+22316)
	cg02176314	1.70323e-08	0.000712817	0.061384	-0.152272	-0.11767	1	15	80733195	ARNT2	ARNT2 (+36503)
	cg00251681	1.70328e-08	0.00071284	-0.0848832	-0.42878	0.0464688	3	1	24795151	NIPAL3	RCAN3 (-34235)
	cg01561304	1.70522e-08	0.000713653	0.00403667	-0.168582	-0.183986	1	5	177913485	COL23A1	COL23A1 (+104070)
	cg05488650	1.70684e-08	0.000714329	-0.165535	-0.0860092	-0.0687952	4	21	36384202	RUNX1	RUNX1 (+37438)
	cg10495496	1.7095e-08	0.000715443	-0.0427003	-0.233462	-0.0228844	6	X	152647472		ZFP92 (-36307)
	cg09014651	1.71175e-08	0.000716384	-0.354811	-0.167369	0.0165958	6	1	151682893	CELF3	CELF3 (+6396)
	cg27006408	1.71315e-08	0.000716972	-0.189902	-0.255264	-0.0418208	6	3	65425807	MAGI1	MAGI1 (+598175)
	cg02352614	1.71656e-08	0.000718397	-0.222377	-0.201229	-0.0121424	6	10	23634921	C10orf67	C10orf67 (-1148)
	cg27222162	1.72059e-08	0.000720084	-0.0182953	-0.20091	-0.158581	2	1	2250860		RER1 (-72411)
	cg09293737	1.72281e-08	0.000721015	-0.116206	-0.210389	-0.0246244	6	12	118312893	KSR2	KSR2 (+93894)
	cg15109169	1.72527e-08	0.000722043	-0.0892813	-0.284534	-0.133168	2	9	102293870		NR4A3 (-295138)
	cg25518066	1.72562e-08	0.00072219	-0.226713	-0.188561	-0.0315542	6	2	207999044	KLF7	KLF7 (+31624)
	cg11353440	1.72579e-08	0.000722262	-0.0580432	-0.399179	-0.0671805	6	2	47290388	TTC7A	C2orf61 (+92128)
	cg03620269	1.72775e-08	0.000723082	0.012708	-0.237773	-0.157451	1	2	191502149		NAB1 (-11809)
	cg06088639	1.73079e-08	0.000724354	-0.0101079	-0.10568	-0.0602179	2	7	98988729	ARPC1B	ARPC1B (+16377)
	cg18699940	1.73812e-08	0.000727422	-0.630874	0.0788295	0.0316933	7	6	151203416	MTHFD1L	MTHFD1L (+16732)
	cg11554328	1.74048e-08	0.000728408	0.166843	0.0932539	0.04084	8	3	14576683	GRIP2	CCDC174 (-116587)
	cg22803868	1.74291e-08	0.000729426	0.0222788	0.139688	0.0405543	8	17	27045164	RAB34	RAB34 (+121)
	cg13937905	1.75295e-08	0.000733626	0.52662	0.115176	0.000859558	8	12	53612551	RARG	ITGB7 (-11461)
	cg12930100	1.75545e-08	0.000734675	-0.024057	0.196028	0.0169211	9	3	181428697	SOX2OT	SOX2 (-1024)
	cg01834043	1.75832e-08	0.000735876	-0.060353	-0.309517	-0.0292598	2	3	42078112		TRAK1 (-54449)
	cg07366462	1.75861e-08	0.000735998	-0.278747	-0.245836	-0.0630795	6	3	123162899	ADCY5	ADCY5 (+5705)
	cg26094554	1.75974e-08	0.000736469	0.0707972	0.170475	0.0375328	8	17	36719654	SRCIN1	SRCIN1 (+42528)
	cg01194336	1.7648e-08	0.000738584	-0.0457782	-0.236994	-0.0639823	4	12	66627997	IRAK3	IRAK3 (+45339)
	cg03633608	1.76598e-08	0.000739079	-0.215595	-0.19683	-0.0316733	6	11	93304082		SMCO4 (-27409)
	cg09024962	1.76907e-08	0.000740374	0.020786	-0.197592	-0.186591	1	5	132707300	FSTL4	FSTL4 (+240954)
	cg07365071	1.77352e-08	0.000742236	-0.0250166	-0.166959	-0.286346	1	1	113006721		WNT2B (-44678)
	cg13777724	1.77473e-08	0.00074274	0.0667823	-0.256202	-0.0672526	1	12	51632068	DAZAP2	DAZAP2 (-539)
	cg07471614	1.77553e-08	0.000743076	-0.074158	-0.326739	0.0617623	5	8	125855152		MTSS1 (-114483)
	cg15144116	1.7757e-08	0.000743149	0.13663	0.211413	0.0351105	8	12	6485598	SCNN1A	SCNN1A (-1209)
	cg01192859	1.77871e-08	0.000744406	0.209208	0.0962069	0.0576723	8	X	68441090		PJA1 (-55727)
	cg20194358	1.77889e-08	0.000744483	-0.00934163	-0.196284	-0.0574818	1	1	120753209		FAM72B (-85795)
	cg04105895	1.78485e-08	0.000746978	-0.0818215	-0.403433	-0.00936487	6	17	21300735	KCNJ12	KCNJ12 (+21227)
	cg08343326	1.78774e-08	0.000748187	-0.0656005	-0.264747	-0.176955	4	16	51973332		TOX3 (+607587)
	cg09925747	1.78844e-08	0.000748479	-0.0863089	-0.483323	-0.0607398	2	10	80514675		ZMIZ1 (-314116)
	cg09947795	1.78946e-08	0.000748909	-0.00465257	-0.14766	-0.145543	1	14	104762067		C14orf144 (+51527)
	cg20265803	1.79611e-08	0.000751692	0.0610287	0.358579	0.123571	8	19	46917036	CCDC8	CCDC8 (-196)
	cg13318787	1.79877e-08	0.000752803	-0.00651355	0.146698	0.0626148	9	5	50262177		PARP8 (+299406)
	cg10582860	1.80169e-08	0.000754027	-0.389643	-0.122552	-0.118992	6	2	55347991		RTN4 (-70312)
	cg07096772	1.80336e-08	0.000754722	-0.0562532	-0.335634	-0.163666	1	2	240884729		NDUFA10 (+80089)
	cg13912573	1.80427e-08	0.000755106	-0.0153326	0.132237	0.0899432	9	9	92293297	LOC100129066	GADD45G (+73370)
	cg07687354	1.80646e-08	0.000756021	-0.0263851	-0.262972	-0.112032	2	16	1217857	CACNA1H	CACNA1H (+14617)
	cg04586407	1.8069e-08	0.000756204	0.0601338	0.239224	0.0551691	8	16	31008574	STX1B	HSD3B7 (+12043)
	cg10022331	1.81164e-08	0.000758191	-0.0046368	-0.123088	-0.127791	1	12	109216828	SSH1	SSH1 (+34537)
	cg01518090	1.81211e-08	0.000758386	-0.113557	-0.0617678	-0.145708	2	11	12368253	MICALCL	PARVA (-30478)
	cg03133301	1.81295e-08	0.000758737	-0.0894915	-0.0941228	-0.180638	2	13	94780851	GPC6	DCT (+351084)
	cg01938725	1.81733e-08	0.000760569	-0.189986	-0.198197	-0.0765135	6	2	102600505	LINC01127	IL1R2 (-7800)
	cg19238536	1.81935e-08	0.000761415	-0.293485	-0.272831	-0.00210357	4	11	8059952	TUB	TUB (-227)
	cg15598244	1.82024e-08	0.00076179	-0.311799	-0.21538	-0.00495502	6	1	23696413	C1orf213	ZNF436 (-479)
	cg13313465	1.8209e-08	0.000762064	-0.198819	-0.32868	-0.0322982	6	1	226198564		SDE2 (-11533)
	cg14826253	1.8249e-08	0.000763738	0.0335822	-0.167359	-0.199335	1	18	40009308	LINC00907	PIK3C3 (+474138)
	cg12651761	1.82596e-08	0.000764182	0.0251783	0.268869	0.102482	8	17	18128022	LLGL1	LLGL1 (-878)
	cg16979095	1.82619e-08	0.000764277	0.0233881	0.150828	0.0759044	8	17	49841729	CA10	CA10 (+394357)
	cg01790344	1.83158e-08	0.000766535	-0.0538444	-0.314447	-0.0181035	6	17	231468		C17orf97 (-28649)
	cg19200920	1.83166e-08	0.000766569	0.0215844	-0.181829	-0.0920836	1	15	57797496	CGNL1	GCOM1 (-86609)
	cg15058210	1.83278e-08	0.000767038	-0.0934126	-0.220805	-0.108539	4	2	240196877	HDAC4	HDAC4 (+125765)
	cg16543391	1.83619e-08	0.000768462	0.0340676	0.132666	0.0536373	9	19	46142732	MIR330	EML2 (+6154)
	cg12654595	1.83632e-08	0.000768517	-0.147212	-0.205834	-0.157111	4	1	22745420		ZBTB40 (-32923)
	cg00249374	1.84079e-08	0.00077039	-0.037993	-0.262688	-0.107762	1	1	168678879	DPT	DPT (+19622)
	cg02647998	1.84158e-08	0.00077072	0.0726037	0.166048	0.0315635	8	3	12201096	TIMP4	TIMP4 (-246)
	cg00957641	1.84392e-08	0.0007717	-0.157122	0.206924	0.106232	9	12	103406953		ASCL1 (+55490)
	cg15341857	1.84409e-08	0.000771768	-0.00116625	-0.136261	-0.085701	1	10	13750681	FRMD4A	PRPF18 (+121755)
	cg03729508	1.84692e-08	0.000772954	-0.175056	-0.251735	-0.0881974	4	19	10563615	PDE4A	PDE4A (+32285)
	cg10763374	1.8523e-08	0.000775205	0.000403433	0.32051	0.0834103	8	10	22608858	COMMD3	BMI1 (-1281)
	cg25770851	1.85582e-08	0.000776681	-0.155284	-0.208959	-0.0339605	6	22	44733478		KIAA1644 (-24748)
	cg10053079	1.85688e-08	0.000777124	-0.166491	-0.265506	-0.0737037	4	5	57452456		PLK2 (+303630)
	cg25827744	1.85786e-08	0.000777532	-0.234141	-0.169605	-0.0245006	4	6	84534803		RIPPLY2 (-28181)
	cg07739927	1.85807e-08	0.000777619	0.253817	0.113977	0.0136283	8	17	62778162	LOC146880	SMURF2 (-119977)
	cg16373294	1.85859e-08	0.00077784	-0.176893	-0.232457	-0.00729089	2	6	3160634		TUBB2A (-2875)
	cg08684301	1.86441e-08	0.000780276	-0.0727653	-0.155461	-0.014437	6	15	34658425	LPCAT4	LPCAT4 (+1053)
	cg00718620	1.86606e-08	0.000780967	0.0276506	0.0928169	0.0573034	8	20	61866613	BIRC7	BIRC7 (-621)
	cg14902598	1.87043e-08	0.000782794	-0.231096	-0.334875	-0.0480872	2	5	138210650	CTNNA1	LRRTM2 (+328)
	cg20307105	1.87173e-08	0.000783336	0.241559	0.233128	-0.0309174	8	5	27472127	LINC01021	CDH9 (-433435)
	cg00982214	1.87186e-08	0.000783392	0.0669628	0.171412	0.0412443	8	1	202614080	SYT2	SYT2 (-1500)
	cg16760130	1.87461e-08	0.000784541	-0.0230225	-0.239622	-0.309034	1	13	43703025		DNAJC15 (+105687)
	cg11305382	1.87977e-08	0.000786704	-0.032926	-0.295133	-0.0656989	2	X	39461236		BCOR (+495419)
	cg08972835	1.88661e-08	0.000789564	-0.158522	-0.180761	-0.119017	4	8	10618641		SOX7 (-30620)
	cg02971581	1.88674e-08	0.000789621	0.0174753	0.305	0.150966	9	1	10895950		CASZ1 (-39246)
	cg19471684	1.89025e-08	0.000791087	-0.0771289	-0.420725	-0.0868819	6	16	81555162	CMIP	CMIP (+76388)
	cg22663604	1.89027e-08	0.000791099	0.234649	0.0888067	0.044502	8	1	156030671	RAB25	RAB25 (-279)
	cg11896024	1.89034e-08	0.000791125	-0.00259304	0.20841	0.0187486	9	5	16738723	MYO10	FAM134B (-121557)
	cg16544676	1.89247e-08	0.000792016	-0.205748	-0.220842	-0.0820986	6	10	94388039	KIF11	KIF11 (+34997)
	cg24544177	1.89472e-08	0.000792958	-0.0918589	-0.358102	9.58539e-05	6	2	237771837		COPS8 (-222117)
	cg13782035	1.89488e-08	0.000793024	0.0104465	-0.389253	-0.0352102	3	5	90610422	LUCAT1	ARRDC3 (+68753)
	cg20480274	1.89842e-08	0.000794507	-0.0418298	0.263315	0.111326	9	17	27313125	SEZ6	SEZ6 (+20190)
	cg00730441	1.90085e-08	0.000795524	0.246231	0.186987	0.0365335	8	17	59483863	TBX2	C17orf82 (-5248)
	cg06210081	1.9014e-08	0.000795756	0.233747	0.129755	0.0487851	8	10	35507416		CREM (+91029)
	cg05507304	1.90544e-08	0.000797446	-0.0127836	-0.112523	-0.203161	1	9	96360531	PHF2	PHF2 (+21843)
	cg21404980	1.90919e-08	0.000799014	-0.0236961	-0.166839	-0.188359	1	8	144599027	ZC3H3	ZC3H3 (+24595)
	cg01110618	1.91014e-08	0.000799411	-0.35175	-0.184748	-0.0261557	4	9	130853728	SLC25A25	SLC25A25 (+23249)
	cg25164886	1.91292e-08	0.000800576	0.195147	0.219553	-0.00642633	8	16	88700624		IL17C (-4376)
	cg01057635	1.91602e-08	0.000801875	0.0753394	0.194174	0.0397345	8	1	46914672		FAAH (+54736)
	cg13363596	1.92058e-08	0.000803782	0.189002	0.104882	0.0126328	8	21	37915313	CLDN14	CLDN14 (-62926)
	cg02892715	1.92132e-08	0.00080409	-0.0723172	-0.372829	-0.0174653	6	3	58563281	FAM107A	FAM107A (+209)
	cg22477100	1.92671e-08	0.000806346	-0.0599265	-0.171193	-0.211181	4	12	120307157	CIT	CIT (+7937)
	cg04736351	1.92887e-08	0.000807251	-0.0271536	0.166088	0.114788	9	14	57274550	OTX2	OTX2 (+2636)
	cg13997937	1.93045e-08	0.000807914	-0.394099	-0.106742	-0.0357956	6	10	60577367	BICC1	BICC1 (+304468)
	cg05912084	1.93074e-08	0.000808032	0.00859707	0.126466	0.0584565	9	17	77775833		CBX8 (-4919)
	cg20397944	1.93106e-08	0.000808169	-0.124697	-0.311839	-0.088616	4	10	7301039	SFMBT2	SFMBT2 (+150263)
	cg05687091	1.93213e-08	0.000808616	-0.0929171	-0.259466	0.0260476	5	18	77218862	NFATC1	NFATC1 (+58527)
	cg02364826	1.93458e-08	0.000809643	-0.572489	-0.0130954	0.093356	7	5	114878738	FEM1C	FEM1C (+1852)
	cg18925548	1.93727e-08	0.000810767	-0.00108427	0.0977048	0.0843036	9	11	46402535	MDK	MDK (+230)
	cg05833106	1.93753e-08	0.000810875	-0.0146301	-0.152634	-0.24417	1	5	11725221	CTNND2	CTNND2 (+178933)
	cg03086300	1.93771e-08	0.000810952	0.00250923	-0.141273	-0.0985214	1	5	40410625		PTGER4 (-268974)
	cg03342674	1.9382e-08	0.000811154	0.00127643	0.0970112	0.0579944	9	9	140193776		NRARP (+2926)
	cg24735129	1.94474e-08	0.000813892	0.3097	0.282225	0.0157548	8	11	70957520		SHANK2 (-99149)
	cg16594273	1.94951e-08	0.00081589	0.08853	0.113411	0.0261441	8	16	58131312		C16orf80 (+32041)
	cg01635555	1.95091e-08	0.000816473	0.0028416	0.351909	0.103496	9	16	73101264		ZFHX3 (-18991)
	cg16419206	1.95666e-08	0.000818881	-0.00670249	-0.499014	-0.14243	4	17	57576599	LINC01476	DHX40 (-66286)
	cg15381251	1.96465e-08	0.000822225	-0.0508516	-0.279226	-0.145545	4	22	32555275	C22orf42	RFPL2 (+44188)
	cg12819393	1.96563e-08	0.000822636	-0.00833907	0.100356	0.102968	9	9	127240449		GPR144 (+27027)
	cg26161895	1.9668e-08	0.000823127	-0.0938821	-0.272589	-0.110051	3	4	159697468	FNIP2	FNIP2 (+7179)
	cg07493324	1.96775e-08	0.000823522	0.0339053	-0.140605	-0.0805021	1	22	26857165	HPS4	HPS4 (+22612)
	cg00404923	1.96868e-08	0.000823911	0.0356146	-0.193599	-0.151674	1	4	184882211	STOX2	STOX2 (+55703)
	cg16984897	1.97012e-08	0.000824514	0.258234	0.158092	0.00223681	8	11	3875715	STIM1	STIM1 (-1216)
	cg23087944	1.97277e-08	0.000825623	0.397969	0.0450363	0.0374282	8	17	7757148	KDM6B	TMEM88 (-1234)
	cg09998056	1.97523e-08	0.000826651	0.00404933	-0.0926546	-0.0447929	1	5	177228834		PROP1 (+194408)
	cg12605568	1.97977e-08	0.000828553	-0.0178372	-0.217293	-0.267295	1	2	178463258		TTC30A (+20435)
	cg00095138	1.97989e-08	0.000828605	-0.00156904	-0.193728	-0.167135	1	4	154155515	TRIM2	TRIM2 (+29898)
	cg03523236	1.98007e-08	0.00082868	-0.0337915	-0.12604	-0.154432	1	12	58480857		XRCC6BP1 (+145498)
	cg11078875	1.98626e-08	0.00083127	-0.474722	-0.0876322	-0.08834	4	1	5805293		NPHP4 (+247237)
	cg03755996	1.9865e-08	0.000831371	-0.560784	0.113181	-0.0374476	7	5	123731081	LINC01170	ZNF608 (+350036)
	cg11205006	1.98836e-08	0.000832148	-0.048361	-0.208454	-0.106628	4	22	26875499	HPS4	HPS4 (+4278)
	cg17075758	1.9918e-08	0.000833587	-0.217178	-0.065435	-0.137156	4	X	16757889	SYAP1	SYAP1 (+20135)
	cg09709142	1.99626e-08	0.000835456	0.289349	0.0994795	0.0413767	8	13	97919888	MBNL2	MBNL2 (+45280)
	cg16058496	1.99941e-08	0.000836772	0.0330765	0.15806	0.0410578	8	11	64527499	PYGM	PYGM (+269)
	cg23966234	2.004e-08	0.000838695	-0.0329083	-0.367625	-0.0995865	3	7	55620535	VOPP1	VOPP1 (+19682)
	cg23385847	2.00835e-08	0.000840514	-0.00819371	0.165152	0.122067	9	5	110644841	CAMK4	CAMK4 (+85058)
	cg09125999	2.01065e-08	0.000841478	-0.105592	-0.321588	0.0561144	5	11	117534685	DSCAML1	DSCAML1 (+133290)
	cg26967566	2.01524e-08	0.000843399	-0.00868583	-0.143593	-0.188355	2	16	85743863	C16orf74	GINS2 (-21259)
	cg04526616	2.01911e-08	0.000845016	0.00337818	-0.15239	-0.153735	1	7	4757846	FOXK1	FOXK1 (+35907)
	cg04115680	2.02104e-08	0.000845825	0.00857632	0.339811	0.0922959	9	7	75889229	SRRM3	HSPB1 (-42631)
	cg04487659	2.02137e-08	0.000845965	-0.00251745	0.153683	0.0441121	9	17	43510575	SH3D20	ARHGAP27 (-7579)
	cg16167808	2.02298e-08	0.000846637	-0.0614572	-0.162078	-0.119624	4	14	104689833		C14orf144 (-20707)
	cg05713079	2.0254e-08	0.000847648	-0.284756	-0.0829201	-0.101994	4	4	25665545	SLC34A2	SLC34A2 (+8080)
	cg07652350	2.02547e-08	0.000847679	0.0267737	0.196407	0.102314	9	11	616009	IRF7	IRF7 (-282)
	cg10626914	2.02611e-08	0.000847946	-0.202231	-0.118872	-0.13469	4	4	79083875	FRAS1	FRAS1 (+105152)
	cg00293796	2.02737e-08	0.000848474	-0.0342294	-0.268497	-0.13924	4	8	104166353	MIR3151	BAALC (+13416)
	cg01120132	2.02899e-08	0.000849151	-0.029713	-0.073678	-0.189204	2	19	31640711	DKFZp566F0947	TSHZ3 (+199741)
	cg04728310	2.03819e-08	0.000853005	0.0438242	0.215135	0.116945	8	19	45947905		ERCC1 (-21082)
	cg25884399	2.04186e-08	0.000854537	0.0447221	0.349177	0.0656462	8	9	139237461	GPSM1	GPSM1 (+15530)
	cg18097021	2.04348e-08	0.000855215	0.0190427	-0.210905	-0.218866	1	5	106725094	EFNA5	EFNA5 (+281501)
	cg23707400	2.04368e-08	0.000855302	0.0579338	0.224449	-0.0391235	8	4	86395991	ARHGAP24	ARHGAP24 (-275)
	cg11227425	2.0453e-08	0.000855977	-0.12255	-0.323608	0.044837	5	9	37954149	SHB	SLC25A51 (-50043)
	cg05227416	2.04857e-08	0.000857345	-0.175459	-0.121922	-0.126297	4	3	55047342	CACNA2D3	LRTM1 (-85242)
	cg08706426	2.04936e-08	0.00085768	-0.064183	-0.321087	0.035137	5	19	3271113	CELF5	CELF5 (+46413)
	cg10942898	2.05032e-08	0.000858079	-0.0710103	-0.106853	-0.0238628	6	5	133708361	UBE2B	UBE2B (+1492)
	cg13441058	2.05248e-08	0.000858985	0.242921	0.220954	0.0492336	8	2	45028269		SIX3 (-140632)
	cg01420388	2.05561e-08	0.000860294	0.0110843	0.138556	0.0479325	8	1	11714254	FBXO44	FBXO2 (+484)
	cg23702716	2.05668e-08	0.000860742	-0.299088	-0.334327	0.00585303	6	2	166720654	LOC100506124	GALNT3 (-69463)
	cg18264284	2.05702e-08	0.000860883	-0.204423	-0.2267	0.0899716	5	17	63102478		RGS9 (-31113)
	cg06849501	2.05919e-08	0.000861793	-0.0212829	-0.271882	-0.0446568	3	11	70458964	SHANK2	CTTN (+214318)
	cg17516330	2.0592e-08	0.000861794	-0.0244195	0.151069	0.0554346	9	15	74494781	STRA6	STRA6 (+417)
	cg09451320	2.05956e-08	0.000861945	-0.0258366	-0.28697	-0.125669	2	12	132639764		NOC4L (+10772)
	cg10814803	2.07223e-08	0.000867248	0.0827444	0.349565	0.0341182	8	2	63273940	LOC100132215	OTX1 (-3996)
	cg16426714	2.07311e-08	0.000867617	0.0827915	0.206328	0.127858	8	17	77773042		CBX8 (-2128)
	cg10891142	2.07314e-08	0.00086763	-0.0111139	-0.24655	-0.178694	4	10	25277946	ENKUR	ENKUR (+27138)
	cg21020871	2.07387e-08	0.000867936	0.0363708	-0.317769	-0.200702	1	13	43457994		DNAJC15 (-139344)
	cg04164048	2.07433e-08	0.000868126	-0.0311831	-0.247227	-0.0374304	6	16	70680498	IL34	MTSS1L (+39470)
	cg12173214	2.08006e-08	0.000870525	0.00735195	-0.283248	-0.107845	1	17	75766979		TNRC6C (-234157)
	cg27379396	2.08632e-08	0.000873146	0.281392	0.143066	0.0614731	8	6	44190496	SLC29A1	SLC29A1 (-866)
	cg16911812	2.11202e-08	0.0008839	-0.126629	-0.11601	-0.0134001	2	X	13302365		ATXN3L (+36152)
	cg04898130	2.1155e-08	0.000885357	-0.238109	-0.240423	-0.0757577	6	11	44810532	TSPAN18	TSPAN18 (+24557)
	cg10209886	2.11562e-08	0.000885408	0.0728207	0.286884	0.122244	8	18	34833563	BRUNOL4	CELF4 (+312436)
	cg08546476	2.12164e-08	0.000887929	0.220676	0.117303	0.0216836	8	1	204049123	SOX13	SOX13 (+6392)
	cg06759255	2.12568e-08	0.00088962	0.0696107	0.11438	0.0781155	8	17	7759060	TMEM88	TMEM88 (+678)
	cg25820462	2.12835e-08	0.000890736	-0.0552232	-0.260326	-0.0624414	4	12	94539274		PLXNC1 (-3224)
	cg12344893	2.13767e-08	0.000894636	0.17708	0.150143	0.0817623	8	14	75920168	JDP2	JDP2 (+21332)
	cg19571972	2.14802e-08	0.000898969	-0.147853	-0.209162	-0.14522	4	20	36931430	BPI	BPI (-1094)
	cg27011060	2.15045e-08	0.000899984	0.141864	0.149246	0.111723	8	11	31825226	PAX6	PAX6 (+14282)
	cg21312542	2.1541e-08	0.000901514	-0.0653566	-0.361038	0.0789537	5	10	93661706		FGFBP3 (+7533)
	cg18921764	2.15437e-08	0.000901624	0.0950605	0.166205	0.0903063	8	10	118923561		VAX1 (-25995)
	cg24468603	2.15849e-08	0.000903351	0.0639297	-0.22049	-0.147114	1	3	69331509	FRMD4B	FRMD4B (+103714)
	cg02705918	2.1603e-08	0.000904108	-0.110959	-0.101486	-0.103976	2	12	114087236		LHX5 (-177360)
	cg06641944	2.1611e-08	0.000904441	-0.175275	-0.317161	-0.149258	4	22	41117093		MCHR1 (+42340)
	cg23607667	2.16142e-08	0.000904574	-0.320371	-0.145552	0.0643442	5	6	90272221	ANKRD6	ANKRD6 (+102)
	cg03020067	2.1664e-08	0.000906661	-0.0273382	-0.20501	-0.0701003	4	6	168789589		SMOC2 (-52241)
	cg06759629	2.17397e-08	0.000909827	-0.101744	-0.26123	-0.107171	4	4	25090198		LGI2 (-57698)
	cg00670438	2.17705e-08	0.000911118	0.0215986	0.130184	-0.00210059	8	14	51410260	PYGL	PYGL (+1193)
	cg14648289	2.17722e-08	0.000911187	-0.0141205	-0.412355	0.00185775	5	4	153516861		FBXW7 (-59609)
	cg04645070	2.17764e-08	0.000911364	-0.318637	-0.239668	0.0728759	5	11	34393106		ABTB2 (-13552)
	cg00689612	2.17812e-08	0.000911565	-0.347362	-0.208263	-0.0810128	4	17	76899627	TIMP2	ENSG00000178404 (-345)
	cg07910724	2.18262e-08	0.000913449	-0.0483463	-0.143035	-0.249868	4	3	117604411		NONE
	cg20248822	2.1842e-08	0.000914111	-0.0996627	-0.196474	-0.0220749	6	1	19922867	C1orf151	MINOS1-NBL1 (-605)
	cg26160008	2.18558e-08	0.000914686	0.0352056	0.149731	0.0679901	8	12	6451035	TNFRSF1A	TNFRSF1A (+244)
	cg13925017	2.18752e-08	0.000915497	-0.188546	-0.29549	-0.0749413	6	2	22600371		NONE
	cg14549634	2.18992e-08	0.000916503	0.0072944	-0.188529	-0.180593	1	14	100869198	WDR25	WARS (-26057)
	cg17633774	2.18995e-08	0.000916516	-0.0252508	-0.31165	-0.0726692	2	18	46194291	CTIF	CTIF (+128763)
	cg20666472	2.19037e-08	0.000916691	-0.0285249	-0.272488	-0.028335	3	3	79378522	ROBO1	ROBO1 (+438442)
	cg02888990	2.1913e-08	0.00091708	-0.0180535	-0.271976	-0.181733	1	8	142720028		PTP4A3 (+317936)
	cg14702811	2.19641e-08	0.00091922	-0.00255293	-0.283284	-0.152818	4	21	19894763		TMPRSS15 (-118791)
	cg25429640	2.19857e-08	0.000920123	-0.068041	-0.0894517	-0.256389	2	5	176302913	UNC5A	HK3 (+23419)
	cg23466749	2.1996e-08	0.000920556	0.0182792	-0.150337	-0.178974	1	6	100920825		SIM1 (-8021)
	cg21480740	2.2033e-08	0.000922105	-0.161418	0.136389	0.144542	9	7	158819193		VIPR2 (+118455)
	cg19904122	2.20562e-08	0.000923072	0.306604	0.101173	0.0214454	8	19	3286059	BRUNOL5	CELF5 (+61359)
	cg05877694	2.20613e-08	0.000923288	0.0149024	0.17723	0.0663742	9	11	128775743	KCNJ5	C11orf45 (-152)
	cg15843331	2.20629e-08	0.000923354	0.120819	0.107755	0.0408916	8	11	61063144	VWCE	VWCE (-249)
	cg17120578	2.20917e-08	0.000924558	-5.74581e-05	0.257641	0.066894	9	8	38329836		FGFR1 (-4474)
	cg03492327	2.20958e-08	0.000924731	-0.0532296	0.260483	0.163933	9	14	57273276	OTX2	OTX2 (+3910)
	cg13954212	2.21042e-08	0.000925085	0.0338367	-0.177783	-0.127519	1	18	64911532		DSEL (+272684)
	cg11349282	2.21961e-08	0.000928928	-0.209878	-0.256401	-0.0822856	4	12	15825754	EPS8	EPS8 (+116755)
	cg01037496	2.22265e-08	0.000930199	0.0119088	0.105206	0.0698273	9	18	686346	ENOSF1	ENOSF1 (+26197)
	cg17583086	2.2312e-08	0.000933781	-0.0925063	-0.381396	-0.106691	4	22	42714204		TCF20 (-102757)
	cg21808174	2.23415e-08	0.000935013	-0.0499342	-0.173604	-0.0821294	4	3	50284297	GNAI2	GNAI2 (+10914)
	cg15716249	2.23452e-08	0.00093517	-0.277038	-0.200514	-0.0321193	4	11	92109617	FAT3	FAT3 (+24356)
	cg14080227	2.23559e-08	0.000935617	-0.181178	-0.235258	-0.0467429	4	9	38363157		ALDH1B1 (-29503)
	cg20611650	2.23701e-08	0.000936209	0.00844565	-0.216607	0.0183397	5	9	140583193	EHMT1	EHMT1 (+69740)
	cg02016273	2.23805e-08	0.000936648	-0.0605566	-0.144882	-0.237591	4	20	35890273		GHRH (-36)
	cg10945555	2.23824e-08	0.000936724	-0.640705	0.156428	-0.0414633	7	7	133163541	EXOC4	EXOC4 (+225713)
	cg14478713	2.23844e-08	0.000936809	-0.166218	-0.0996352	-0.055675	6	9	16653688	BNC2	BNC2 (+217015)
	cg12807330	2.23893e-08	0.000937016	-0.0443218	-0.283542	-0.167834	2	5	176004772	PCDH24	GPRIN1 (+32361)
	cg08394698	2.2394e-08	0.00093721	0.00111888	-0.296177	-0.0198212	3	1	20857663		MUL1 (-23010)
	cg23269985	2.24255e-08	0.000938531	-0.21748	-0.308101	-0.068322	6	12	131300142	STX2	STX2 (+23596)
	cg25987744	2.24294e-08	0.000938691	0.00349047	0.236086	0.0942858	9	19	46916588	CCDC8	CCDC8 (+252)
	cg09831906	2.24407e-08	0.000939165	-0.268549	-0.124627	0.0215708	6	1	212650765		NENF (+44537)
	cg27436259	2.24648e-08	0.000940176	0.424095	0.178859	-0.0316655	8	16	31147017	PRSS8	PRSS8 (+65)
	cg07113025	2.25609e-08	0.000944194	-0.000371577	-0.319632	-0.0362036	4	3	113933023		ZNF80 (+23401)
	cg06709297	2.25636e-08	0.00094431	-0.0845018	-0.410937	0.162196	5	2	10302454	C2orf48	RRM2 (+40000)
	cg13424923	2.25885e-08	0.000945351	0.19418	0.102271	0.0445875	8	2	65258738		CEP68 (-24767)
	cg16218477	2.26011e-08	0.000945879	-0.146185	-0.19467	-0.0276085	6	7	1066167	C7orf50	GPR146 (-28753)
	cg27072395	2.26237e-08	0.000946826	-0.076848	-0.1429	-0.122149	2	12	117959879	KSR2	NOS1 (-191001)
	cg17310423	2.2632e-08	0.00094717	-0.0649721	-0.256242	-0.0541932	6	6	90307965	ANKRD6	ANKRD6 (+35846)
	cg11508123	2.26459e-08	0.000947755	-0.0253601	-0.138189	-0.194625	2	6	129796679	LAMA2	ARHGAP18 (+234690)
	cg23725027	2.2676e-08	0.000949015	-0.122417	-0.117577	-0.16234	4	2	43285817		ZFP36L2 (+167930)
	cg06621691	2.26823e-08	0.000949277	-0.00134187	-0.268184	-0.0928449	3	7	4175814	SDK1	FOXK1 (-546125)
	cg14163740	2.27138e-08	0.000950597	-0.271468	-0.280881	-0.0731679	6	1	2006139	PRKCZ	PRKCZ (+24231)
	cg16866100	2.27398e-08	0.000951685	-0.00166286	-0.135938	-0.127763	1	17	57502922		YPEL2 (+93860)
	cg16053334	2.27801e-08	0.000953372	0.174822	0.148555	0.00109791	8	11	65343118	EHBP1L1	EHBP1L1 (-390)
	cg03940005	2.28088e-08	0.000954569	-0.0538099	-0.194239	-0.180459	2	12	99431679	ANKS1B	APAF1 (+392761)
	cg20148878	2.28194e-08	0.000955013	-0.0148586	-0.182277	-0.0678477	1	5	176333197	UIMC1	HK3 (-6865)
	cg14211332	2.28297e-08	0.000955446	0.133948	0.124432	-0.00530417	8	1	117255389		CD2 (-41617)
	cg04065086	2.28521e-08	0.000956383	0.443579	0.199362	-0.0556693	8	1	151104186	SEMA6C	SEMA6C (+14746)
	cg11534215	2.28556e-08	0.000956532	-0.154793	-0.143424	-0.125903	4	2	240200967	HDAC4	HDAC4 (+121675)
	cg26680502	2.29602e-08	0.000960909	0.181325	0.29812	0.0885414	8	20	37433765	PPP1R16B	PPP1R16B (-582)
	cg02620054	2.29827e-08	0.000961849	-0.0859786	-0.326079	-0.0417505	6	10	133946674	JAKMIP3	JAKMIP3 (+28500)
	cg04056615	2.29876e-08	0.000962053	-0.475859	-0.166465	0.0124875	6	1	151682830	CELF3	CELF3 (+6459)
	cg00411413	2.30264e-08	0.000963678	-0.293435	-0.149458	-0.0268863	6	16	83171299	CDH13	CDH13 (+510730)
	cg09872278	2.30557e-08	0.000964903	-0.0181845	0.200934	0.132899	9	1	150231727	CA14	CA14 (+2174)
	cg06935531	2.30566e-08	0.000964943	-0.121219	-0.0872047	-0.098973	4	7	47521938	TNS3	TNS3 (+57260)
	cg27294249	2.31212e-08	0.000967645	0.049693	0.108021	0.0893899	8	5	124827859	LOC101927460	ZNF608 (-746742)
	cg05005343	2.3144e-08	0.000968598	-0.259222	-0.247895	0.00238268	6	11	121970285	LOC399959	BLID (+16637)
	cg25859553	2.32084e-08	0.000971296	-0.0315435	-0.346365	-0.0517663	6	1	10519369		CORT (+9594)
	cg13518625	2.32254e-08	0.000972006	-0.0993186	-0.252079	0.0330182	5	8	29522838		DUSP4 (-314654)
	cg00711171	2.32606e-08	0.000973481	-0.0122246	-0.19155	-0.0835354	3	7	2915772		GNA12 (-31815)
	cg07528042	2.32613e-08	0.000973507	-0.245479	-0.298965	0.0154819	6	1	25849066		LDLRAP1 (-21004)
	cg09845015	2.32925e-08	0.000974816	-0.018341	-0.13525	-0.0592728	2	11	70458994	SHANK2	CTTN (+214348)
	cg23718195	2.33053e-08	0.000975348	-0.143715	-0.411577	-0.0901062	6	17	21300791	KCNJ12	KCNJ12 (+21283)
	cg05903736	2.33499e-08	0.000977216	-0.0549114	-0.34883	-0.0169171	6	2	240197131	HDAC4	HDAC4 (+125511)
	cg16038593	2.33548e-08	0.00097742	-0.133524	-0.199378	-0.107828	4	10	103377514	FBXW4	DPCD (+29470)
	cg00532633	2.33885e-08	0.000978831	-0.00860481	-0.236861	-0.098666	2	16	75339601	CFDP1	BCAR1 (-39697)
	cg09683350	2.34187e-08	0.000980094	0.0333453	0.16781	0.0340335	8	15	89914466		POLG (-36389)
	cg17036495	2.34211e-08	0.000980197	0.0178763	-0.163304	-0.284524	1	10	53503234	PRKG1	CSTF2T (-43880)
	cg21040096	2.34418e-08	0.000981063	-0.06808	-0.0712859	-0.163798	2	17	182928	RPH3AL	RPH3AL (+19669)
	cg01005735	2.34479e-08	0.00098132	0.0193404	0.19827	0.10114	8	6	10585826	GCNT2	GCNT6 (-48166)
	cg14110885	2.34911e-08	0.000983124	-0.00450145	-0.155504	-0.224635	1	17	48911141	WFIKKN2	WFIKKN2 (-1629)
	cg08542199	2.34944e-08	0.000983265	-0.0161731	-0.147656	-0.268722	1	6	170199193	C6orf208	ERMARD (+47473)
	cg13401645	2.35028e-08	0.000983615	-0.0199359	-0.0993116	-0.178568	1	18	34856790	CELF4	CELF4 (+289209)
	cg17138769	2.35393e-08	0.000985143	-0.00884107	0.184086	0.108965	9	10	118892211	VAX1	VAX1 (+5355)
	cg15897704	2.36468e-08	0.000989644	-0.137879	-0.291033	-0.124034	4	15	43089585	TTBK2	CDAN1 (-60262)
	cg17027138	2.36744e-08	0.000990799	-0.142483	-0.158288	-0.148426	4	5	55529228	ANKRD55	IL6ST (-238408)
	cg21342971	2.37626e-08	0.000994488	-0.0161686	0.177982	0.0589537	9	20	61585615	SLC17A9	SLC17A9 (+1564)
	cg23564931	2.37829e-08	0.000995338	-0.0777187	-0.29077	-0.095924	2	17	66511075	PRKAR1A	PRKAR1A (+2508)
	cg02551743	2.38354e-08	0.000997536	0.141507	0.266464	-0.0203568	8	2	66673428	MEIS1	MEIS1 (+10897)
	cg25198007	2.3916e-08	0.00100091	-0.00199691	-0.359012	0.0411599	3	1	26611319	UBXN11	SH3BGRL3 (+5653)
	cg26848724	2.39424e-08	0.00100201	-0.0946646	-0.428092	-0.0252333	2	13	31326405	ALOX5AP	ALOX5AP (+16761)
	cg05330471	2.39729e-08	0.00100329	0.00966419	-0.288185	-0.114768	1	9	121771590		BRINP1 (+360154)
	cg03707168	2.4003e-08	0.00100455	-0.237581	-0.215398	-0.0775234	6	19	49379127	PPP1R15A	PPP1R15A (+3479)
	cg24096172	2.40251e-08	0.00100547	-0.103485	-0.0998448	-0.174077	4	17	80323720		TEX19 (+6598)
	cg00197612	2.40279e-08	0.00100559	0.0210406	0.137368	0.0688458	8	21	32716820	TIAM1	TIAM1 (+214469)
	cg09015774	2.40374e-08	0.00100599	0.0792458	0.149207	0.00187416	8	1	7022284	CAMTA1	CAMTA1 (+176901)
	cg11587451	2.40491e-08	0.00100648	-0.0778646	-0.372801	-0.0139351	3	1	234749176		IRF2BP2 (-3906)
	cg02309752	2.42415e-08	0.00101453	0.092098	0.124433	0.00534877	8	8	11835607		DEFB136 (-3500)
	cg15013496	2.42649e-08	0.00101551	-0.0420036	0.135648	0.0812146	9	18	76745056	SALL3	SALL3 (+4782)
	cg04828958	2.43178e-08	0.00101772	-0.0948615	0.226243	0.108614	9	14	101307013	MEG3	RTL1 (+44170)
	cg12405220	2.43442e-08	0.00101883	-0.0785791	-0.204667	0.0675016	5	5	179159327	MAML1	MAML1 (-523)
	cg00934394	2.43597e-08	0.00101948	-0.0808863	0.247192	0.0704964	9	10	114716764	TCF7L2	TCF7L2 (+6756)
	cg21972903	2.43621e-08	0.00101958	-0.143265	-0.361863	0.0560601	5	1	21501248	EIF4G3	EIF4G3 (+2094)
	cg15422685	2.43698e-08	0.0010199	0.0413294	0.0821612	0.0710467	8	3	62356774	FEZF2	FEZF2 (+2415)
	cg25011257	2.43809e-08	0.00102037	-0.247759	-0.286822	-0.0216643	2	11	2193187	TH	TH (-153)
	cg03001333	2.44065e-08	0.00102144	-0.245723	-0.422295	0.0179107	5	1	2005560	PRKCZ	PRKCZ (+23652)
	cg10319415	2.44497e-08	0.00102325	-0.278964	-0.116946	-0.0641214	6	4	140544535		MGST2 (-42386)
	cg12063688	2.44835e-08	0.00102466	0.0387659	0.164456	0.0364103	8	14	65173327	PLEKHG3	PLEKHG3 (+2174)
	cg09424405	2.44876e-08	0.00102483	-0.0279216	-0.262144	-0.189503	4	2	17347952		RAD51AP2 (+351753)
	cg19074669	2.44975e-08	0.00102524	-0.589662	0.0248892	0.104266	7	2	8260068	LINC00299	ID2 (-558906)
	cg03495084	2.45438e-08	0.00102718	-0.0122224	-0.399271	0.0240933	3	3	15311154	SH3BP5	SH3BP5 (+62981)
	cg11821532	2.45488e-08	0.00102739	-0.0372267	-0.331458	-0.0848318	4	12	131520057	ADGRD1	GPR133 (+81606)
	cg01463225	2.45745e-08	0.00102847	-0.0585513	-0.386399	-0.0954621	4	9	136544460	SARDH	DBH (+42979)
	cg20193802	2.47808e-08	0.0010371	0.134126	0.156826	0.00173016	8	22	19709696	38596	GP1BB (-771)
	cg17494267	2.4787e-08	0.00103736	-0.28289	-0.106813	-0.0162962	6	22	40086440		CACNA1I (+119683)
	cg03401118	2.48317e-08	0.00103923	-0.103373	-0.136845	-0.211386	4	14	98047736		VRK1 (+784096)
	cg10115936	2.48533e-08	0.00104014	-0.021214	-0.181338	-0.207913	1	X	2813151		ARSD (+34240)
	cg11746531	2.48599e-08	0.00104041	-0.185109	-0.116903	-0.0289612	4	17	25784992		KSR1 (-14043)
	cg10019467	2.49064e-08	0.00104236	0.400409	0.114826	0.0284263	8	4	40632788	RBM47	RBM47 (-116014)
	cg01831971	2.49307e-08	0.00104338	-0.181854	-0.194448	-0.0396917	6	12	96821329		CDK17 (-26992)
	cg10238080	2.49458e-08	0.00104401	0.0627829	0.0829907	0.0365721	8	12	50445058		ASIC1 (-6272)
	cg16006418	2.50244e-08	0.0010473	-0.121426	-0.256121	-0.160342	4	3	107403385	BBX	BBX (+161563)
	cg17682290	2.50631e-08	0.00104892	-0.0153002	0.153222	0.0457868	9	20	47368036	PREX1	PREX1 (+76383)
	cg10530239	2.50724e-08	0.00104931	0.0333395	0.118038	0.0307848	8	2	159602048		DAPL1 (-49780)
	cg03050166	2.50794e-08	0.0010496	-0.0202082	-0.309424	-0.149754	4	10	80605109		ZMIZ1 (-223682)
	cg02843201	2.50849e-08	0.00104983	-0.0206148	-0.1613	-0.0759208	3	16	22103596	VWA3A	VWA3A (-266)
	cg11142925	2.51379e-08	0.00105205	-0.025762	-0.385055	0.06599	5	10	57071878		MTRNR2L5 (-286871)
	cg11017086	2.51522e-08	0.00105265	0.117864	0.116126	0.0543524	8	4	979022	SLC26A1	IDUA (-1762)
	cg06441265	2.51696e-08	0.00105337	-0.0354661	-0.174462	-0.134853	1	12	32418192	BICD1	BICD1 (+158030)
	cg26273211	2.52203e-08	0.00105549	-0.0697307	-0.143748	-0.0278351	4	5	139135269		PSD2 (-40136)
	cg07993842	2.52354e-08	0.00105613	-0.157609	-0.312726	-0.0640326	6	2	46132201	PRKCE	PRKCE (+253289)
	cg23224090	2.52415e-08	0.00105638	0.0371517	0.178763	0.06157	8	17	80190033	SLC16A3	SLC16A3 (-1529)
	cg02724317	2.5259e-08	0.00105711	-0.0254777	-0.358413	-0.0419728	6	10	14644114	FAM107B	CDNF (+235956)
	cg18883198	2.52735e-08	0.00105772	-0.154623	-0.116665	0.004962	5	1	25758604	TMEM57	TMEM57 (+1194)
	cg18724430	2.53336e-08	0.00106024	0.0751698	0.147576	0.0390697	8	15	89951787		POLG (-73710)
	cg08963170	2.53839e-08	0.00106234	-0.0195739	-0.092402	-0.141051	1	22	45894997		FBLN1 (-3773)
	cg17228929	2.54181e-08	0.00106377	-0.0647797	-0.207637	-0.138881	4	1	33802477	PHC2	A3GALT2 (-15779)
	cg22418668	2.54877e-08	0.00106669	0.291534	0.118991	0.030697	8	13	72451660		DACH1 (-10331)
	cg17396955	2.5676e-08	0.00107457	0.0114097	-0.170177	-0.090001	1	5	142974803		NR3C1 (-191550)
	cg04587012	2.56856e-08	0.00107497	-0.164557	-0.304504	-0.128885	4	3	124491242	ITGB5	UMPS (+42030)
	cg21386414	2.5686e-08	0.00107498	0.136925	0.149269	0.0169258	8	1	26421349		PDIK1L (-16978)
	cg03565777	2.57256e-08	0.00107664	-0.418171	-0.104495	-0.0447409	6	12	125028339		NCOR2 (-48542)
	cg11846494	2.57416e-08	0.00107731	-0.453386	0.0539407	-0.123066	4	11	83393148	DLG2	CCDC90B (-395699)
	cg17707057	2.57597e-08	0.00107807	-0.0749628	-0.110266	-0.145298	2	7	43630711	STK17A	STK17A (+8048)
	cg20835217	2.58031e-08	0.00107988	-0.116649	-0.306657	-0.0332904	6	4	77674657	SHROOM3	SEPT11 (-196198)
	cg05092017	2.58132e-08	0.00108031	-0.137347	-0.0621795	-0.138245	4	11	77435894	RSF1	CLNS1A (-87045)
	cg17441233	2.58343e-08	0.00108119	-0.120681	-0.22488	0.0272179	5	7	29662482		PRR15 (+59056)
	cg17266123	2.59256e-08	0.00108501	-0.29619	-0.0327042	-0.104366	4	21	30476810	MAP3K7CL	MAP3K7CL (+23938)
	cg21821388	2.59841e-08	0.00108746	-0.0485245	-0.192688	-0.106069	4	17	40352975	STAT5B	GHDC (-6763)
	cg00241041	2.60063e-08	0.00108839	0.00935267	-0.155606	-0.281255	1	4	59005143		NONE
	cg23057051	2.6019e-08	0.00108892	0.159745	0.0752872	0.0354271	8	16	89984268	MC1R	MC1R (-18)
	cg03811319	2.60548e-08	0.00109042	0.0300076	0.140992	0.104383	9	11	2884118		CDKN1C (+22992)
	cg17090237	2.60663e-08	0.0010909	-0.360913	-0.257271	-0.00512669	4	11	8060223	TUB	TUB (+44)
	cg05927593	2.60723e-08	0.00109115	-0.105094	-0.29421	0.0614933	5	7	112784917		LINC00998 (-26250)
	cg08899895	2.60965e-08	0.00109217	-0.20887	-0.17874	0.000655032	6	16	85684853	KIAA0182	GINS2 (+37751)
	cg24970032	2.61465e-08	0.00109426	-0.0774248	-0.189031	-0.0794353	4	5	946277		BRD9 (-53339)
	cg09274827	2.61793e-08	0.00109563	-0.0318055	-0.0798709	-0.0773935	2	16	85518901		GSE1 (-127920)
	cg08153335	2.61919e-08	0.00109616	0.182843	0.128021	0.0227554	8	2	26541960	GPR113	GPR113 (-44)
	cg15895071	2.62114e-08	0.00109697	-0.106495	-0.173774	-0.135986	4	16	22129011	VWA3A	VWA3A (+25149)
	cg14001914	2.62936e-08	0.00110041	0.240612	0.265713	-0.0163006	8	4	25865695	SEL1L3	SEL1L3 (-1115)
	cg02947450	2.63274e-08	0.00110183	0.0705269	0.260303	0.0195285	8	10	22766861		SPAG6 (+132463)
	cg02921623	2.63473e-08	0.00110266	0.0159548	-0.323288	-0.114051	4	10	105250537		NEURL1 (-3198)
	cg24377745	2.63493e-08	0.00110275	0.00782738	-0.148898	-0.0547386	1	12	120672541	PXN	PXN (+31021)
	cg07033292	2.63712e-08	0.00110366	-0.0163167	-0.123947	-0.0913927	4	15	78287690	TBC1D2B	TBC1D2B (+82303)
	cg17398613	2.64683e-08	0.00110772	-0.0775991	-0.353938	-0.108524	4	21	43919853	SLC37A1	RSPH1 (-3390)
	cg09510180	2.64857e-08	0.00110845	0.00485751	0.219994	0.108712	9	1	10895978		CASZ1 (-39274)
	cg27475443	2.64868e-08	0.0011085	-0.350306	-0.169086	-0.0530586	6	15	64472713	CSNK1G1	PPIB (-17310)
	cg26096656	2.65337e-08	0.00111046	-0.0725163	-0.351448	-0.177682	4	2	110063755	SH3RF3	SEPT10 (+308027)
	cg03804400	2.65405e-08	0.00111075	0.0181114	-0.211433	-0.163684	1	3	143505340	SLC9A9	SLC9A9 (+62032)
	cg03731303	2.65548e-08	0.00111135	0.0140869	0.277046	0.00781355	8	3	181443009	SOX2OT	SOX2 (+13288)
	cg09485430	2.65702e-08	0.00111199	-0.071064	-0.368022	-0.101977	6	3	64039543		PSMD6 (-30308)
	cg18970169	2.65949e-08	0.00111302	0.0940696	0.116397	0.0444537	8	22	24110877	CHCHD10	CHCHD10 (-248)
	cg21908344	2.66423e-08	0.00111501	-0.0709538	-0.197053	-0.0260974	6	17	17185060	COPS3	COPS3 (-454)
	cg11451198	2.66788e-08	0.00111653	-0.101731	-0.322869	-0.151263	4	6	150599060		IYD (-90967)
	cg26215869	2.66788e-08	0.00111654	-0.0267753	-0.137461	-0.1953	4	14	73384273		DCAF4 (-8766)
	cg09756419	2.67047e-08	0.00111762	0.0942082	0.26348	0.055466	8	16	67918680	NRN1L	NRN1L (-27)
	cg16370096	2.67209e-08	0.00111829	-0.107228	-0.164129	-0.0454499	6	8	142042906		PTK2 (-31650)
	cg03828193	2.67636e-08	0.00112008	-0.0910697	-0.433768	-0.078996	6	17	80622941	RAB40B	WDR45B (-16531)
	cg15289643	2.67927e-08	0.0011213	-0.0854572	-0.305457	-0.00470326	5	16	14280702	MKL2	MKL2 (+107558)
	cg11144842	2.68128e-08	0.00112214	-0.260355	-0.193776	0.0293372	5	6	24522852	ALDH5A1	ALDH5A1 (+27656)
	cg00872532	2.68653e-08	0.00112434	0.0221149	0.11202	0.0369352	9	2	189168448	GULP1	GULP1 (+10890)
	cg08792995	2.68694e-08	0.00112451	-0.26242	-0.20579	-0.0420046	6	6	108145658	SCML4	SCML4 (-143)
	cg20051117	2.68868e-08	0.00112524	0.0666122	-0.247856	-0.149664	1	1	226616835		PARP1 (-21062)
	cg01173316	2.69607e-08	0.00112833	0.0212941	-0.217424	-0.129045	1	10	3846711		KLF6 (-19245)
	cg16023796	2.70281e-08	0.00113115	-0.0187664	-0.192609	-0.0768211	2	11	12237153	MICAL2	MICALCL (-71293)
	cg24852032	2.70811e-08	0.00113337	-0.169587	-0.195129	0.00398884	5	6	33396223	SYNGAP1	SYNGAP1 (+8283)
	cg09418336	2.7103e-08	0.00113429	-0.188403	-0.168034	-0.0883979	4	16	57727746	CCDC135	CCDC135 (-965)
	cg12301174	2.71054e-08	0.00113439	-0.19106	-0.16217	-0.222426	4	20	36619770	TTI1	TTI1 (+42092)
	cg10454912	2.71203e-08	0.00113501	-0.0586796	0.234705	0.135737	9	2	45167369	SIX3-AS1	SIX3 (-1532)
	cg08399404	2.71547e-08	0.00113645	-0.0817428	-0.188014	-0.13976	2	13	113411200	ATP11A	ATP11A (+66558)
	cg09162858	2.71631e-08	0.0011368	-0.182999	-0.361724	0.0965564	5	10	25115177		ARHGAP21 (-102581)
	cg18064917	2.71827e-08	0.00113762	-0.164698	-0.20862	-0.059729	6	2	47420867		CALM2 (-17128)
	cg02833172	2.71976e-08	0.00113825	-0.0859482	-0.176517	-0.166737	4	16	84774950	USP10	USP10 (+41367)
	cg04694615	2.7262e-08	0.00114094	-0.132345	-0.486244	0.0156877	5	3	13420948	NUP210	NUP210 (+40860)
	cg08206881	2.73283e-08	0.00114372	-0.0538219	-0.328774	-0.00720145	3	2	12317357		LPIN1 (+499637)
	cg23136645	2.73381e-08	0.00114413	0.00765278	-0.296741	0.0385342	3	2	1418073	TPO	TPO (+841)
	cg13083674	2.73645e-08	0.00114523	0.00495324	0.174715	0.0558862	9	19	55953372	SHISA7	SHISA7 (+857)
	cg20697066	2.73811e-08	0.00114593	-0.314309	-0.0852104	-0.11083	4	1	18406624		IGSF21 (-27615)
	cg18057851	2.74019e-08	0.0011468	-0.215873	-0.249024	-0.0713708	6	7	108082703	NRCAM	NRCAM (+14122)
	cg26984380	2.74319e-08	0.00114805	-0.0858212	-0.18554	-0.0849356	4	15	74449475		ISLR (-16536)
	cg16292208	2.74333e-08	0.00114811	-0.249357	-0.170301	-0.0800262	6	20	11330917		BTBD3 (-540558)
	cg20149898	2.7479e-08	0.00115002	0.0187817	-0.299616	-0.125047	1	13	22553760		FGF9 (+308239)
	cg21139291	2.75139e-08	0.00115149	0.0182883	-0.206462	-0.0511266	1	11	6425839	APBB1	SMPD1 (+14179)
	cg08501881	2.75401e-08	0.00115258	-0.133925	-0.278471	0.0614992	5	3	185539108	IGF2BP2	IGF2BP2 (+3735)
	cg00290033	2.75674e-08	0.00115372	0.23945	0.138932	-0.0173314	8	6	14640562		CD83 (+522691)
	cg01317456	2.76219e-08	0.001156	-0.130905	-0.106229	-0.0564179	4	10	54392390		MBL2 (+139069)
	cg08866213	2.77389e-08	0.0011609	-0.115529	-0.252469	-0.0430388	6	3	192530777	MB21D2	MB21D2 (+105172)
	cg08500818	2.79729e-08	0.0011707	0.0476449	0.132675	0.0506222	8	16	68001756	SLC12A4	SLC12A4 (+840)
	cg03377610	2.79972e-08	0.00117171	-0.0218478	0.123739	0.0635392	9	2	45164723		SIX3 (-4178)
	cg24822529	2.80498e-08	0.00117391	-0.0359697	-0.495892	0.0699696	5	5	134582880		H2AFY (+152431)
	cg04711324	2.80892e-08	0.00117556	-0.0457503	-0.227433	-0.176822	4	18	40695633	RIT2	RIT2 (+22)
	cg23958942	2.81061e-08	0.00117627	-0.0804754	-0.307589	-0.109543	6	1	21947294	RAP1GAP	RAP1GAP (+31053)
	cg25326319	2.81443e-08	0.00117787	-0.0621651	-0.175547	-0.0510728	6	7	1733132		ELFN1 (+5378)
	cg18603473	2.81826e-08	0.00117947	-0.132118	-0.106526	-0.0500471	4	10	50143375	WDFY4	LRRC18 (-21099)
	cg06273075	2.81954e-08	0.00118001	0.0528699	0.132204	0.0139991	8	16	14397688	MIR193B	MKL2 (+224544)
	cg18718397	2.82034e-08	0.00118034	-0.245071	-0.121813	-0.0253938	4	21	38827862	DYRK1A	DYRK1A (+35261)
	cg02900757	2.82639e-08	0.00118287	-0.150431	-0.0800019	-0.185031	4	10	126782576	CTBP2	CTBP2 (-66118)
	cg04703069	2.82654e-08	0.00118294	-0.179894	-0.247042	-0.0687001	2	1	23126717	EPHB2	EPHB2 (+89255)
	cg10024583	2.82843e-08	0.00118373	0.157089	0.159435	0.0436097	8	17	45772800	TBKBP1	TBKBP1 (+171)
	cg08463186	2.82944e-08	0.00118415	0.0144525	0.220364	0.0160862	9	8	91683312		TMEM64 (-25002)
	cg02535359	2.83014e-08	0.00118444	-0.135746	-0.0830574	-0.0716435	2	7	158898593	VIPR2	VIPR2 (+39055)
	cg22990562	2.8342e-08	0.00118614	0.00592164	0.224502	0.0868691	9	9	119843558	ASTN2	ASTN2 (+333789)
	cg20904475	2.83684e-08	0.00118724	0.162663	0.186358	0.0287088	8	8	61823027		CHD7 (+231691)
	cg23679683	2.83759e-08	0.00118756	-0.0277014	-0.224751	-0.162048	4	17	52999		DOC2B (-21573)
	cg13891702	2.8402e-08	0.00118865	0.0814036	0.0660086	0.0514876	8	11	31824973	PAX6	PAX6 (+14535)
	cg13460168	2.84338e-08	0.00118998	-0.29203	0.35016	0.127195	9	1	16501540		EPHA2 (-18959)
	cg06824013	2.85104e-08	0.00119319	0.0460476	0.0810712	0.0534758	8	15	53097247		ONECUT1 (-15039)
	cg22953960	2.85275e-08	0.0011939	0.00312501	0.359822	0.0868675	9	10	22766081		SPAG6 (+131683)
	cg06314111	2.85477e-08	0.00119475	0.0365375	0.341027	0.116789	8	12	58119915	AGAP2	AGAP2 (+12113)
	cg17283266	2.85771e-08	0.00119598	-0.213001	-0.200741	0.00490754	5	11	111717611	ALG9	ALG9 (+23976)
	cg16505548	2.85795e-08	0.00119608	0.153325	0.218071	-0.0102522	8	X	49013750		PLP2 (-14522)
	cg21241017	2.86447e-08	0.00119881	-0.0435983	-0.123702	-0.122463	2	4	152720170		PET112 (-37996)
	cg11308512	2.86502e-08	0.00119904	0.00597341	0.119806	0.0439963	8	19	3365553	NFIC	NFIC (-1030)
	cg09371059	2.86521e-08	0.00119912	0.258859	0.0893805	0.0251416	8	16	17842081		XYLT1 (-277344)
	cg12229151	2.86558e-08	0.00119928	0.307378	0.208947	0.039571	8	11	6340283	PRKCDBP	PRKCDBP (+1593)
	cg24437600	2.86865e-08	0.00120056	-0.110934	-0.144209	-0.131186	2	12	72361228	TPH2	TPH2 (+28603)
	cg11800004	2.86964e-08	0.00120097	-0.0884536	-0.170595	-0.0482423	6	X	150905551	CNGA2	CNGA2 (-1371)
	cg23833461	2.87251e-08	0.00120217	-0.0160036	-0.418285	0.00403767	3	17	9929528	GAS7	RCVRN (-120591)
	cg03800065	2.87286e-08	0.00120232	-0.0684023	-0.186244	-0.10169	2	10	134808159		TTC40 (-52071)
	cg02075242	2.87527e-08	0.00120333	-0.0627752	-0.379265	0.0894879	5	4	25886241		SEL1L3 (-21661)
	cg08975360	2.8757e-08	0.00120351	-0.13897	-0.0624197	-0.0534994	4	11	131116242		SNX19 (-329839)
	cg17421193	2.8924e-08	0.0012105	-0.0232042	-0.199139	-0.0767727	1	10	87828462	GRID1	GRID1 (+297772)
	cg02565308	2.89741e-08	0.00121259	0.047705	0.193599	-0.0274467	8	9	135645631	C9orf98	DDX31 (-99844)
	cg02316156	2.8987e-08	0.00121314	-0.00361402	-0.110874	-0.0833564	2	12	132661639		GALNT9 (+28933)
	cg13773741	2.90029e-08	0.0012138	-0.0225998	-0.245826	-0.159332	2	17	9967499	GAS7	GAS7 (+134368)
	cg06751898	2.91167e-08	0.00121856	-0.178605	-0.174215	-0.0698906	4	16	89114766		ACSF3 (-45450)
	cg22181129	2.92302e-08	0.00122331	-0.0266343	-0.188534	-0.0542521	4	4	159924330	C4orf45	FNIP2 (+234041)
	cg12948604	2.92432e-08	0.00122386	-0.079417	-0.266913	-0.073707	4	5	157912244		EBF1 (+614524)
	cg17473341	2.92575e-08	0.00122446	-0.0471761	0.206954	0.0952594	9	12	95940370	USP44	USP44 (+4895)
	cg12850078	2.92795e-08	0.00122538	0.51043	0.170207	-0.0399109	8	15	89922071	LOC254559	POLG (-43994)
	cg12647052	2.93681e-08	0.00122908	0.00195103	-0.142769	-0.146262	1	17	44803759	NSF	WNT3 (+92366)
	cg12431087	2.93917e-08	0.00123007	0.00578566	0.211717	0.154626	9	3	71355122	FOXP1	FOXP1 (-175135)
	cg16716563	2.95103e-08	0.00123503	-0.0694055	-0.117885	-0.168143	4	9	130423419	STXBP1	C9orf117 (-45851)
	cg10502244	2.95547e-08	0.0012369	0.173314	0.229169	0.0281922	8	12	48399295	COL2A1	COL2A1 (-1027)
	cg06728103	2.95686e-08	0.00123747	-0.105215	-0.263003	-0.01524	6	12	93930699		SOCS2 (-32890)
	cg26319038	2.96102e-08	0.00123922	-0.141916	-0.252977	-0.115742	4	2	218723627	TNS1	TNS1 (+85223)
	cg03860851	2.96502e-08	0.00124089	-0.272937	-0.0986734	-0.05671	6	13	114944680		RASA3 (-46595)
	cg04507642	2.96583e-08	0.00124123	-0.0969758	-0.163368	0.00939117	5	12	51813664	SLC4A8	SLC4A8 (-4890)
	cg00635259	2.96598e-08	0.00124129	-0.078643	-0.229611	-0.0108694	6	17	62159682	ERN1	ERN1 (+47802)
	cg17780687	2.97057e-08	0.00124321	-0.128934	-0.217474	-0.0638919	4	17	21360702		KCNJ12 (+81194)
	cg17575972	2.97992e-08	0.00124713	-0.228179	-0.270017	-0.0834757	4	22	32322952		YWHAH (-17494)
	cg13866137	2.97999e-08	0.00124716	-0.0517242	-0.173238	-0.0324894	3	X	17432450	NHS	NHS (+38908)
	cg05068951	2.9824e-08	0.00124816	-0.00745668	0.172955	0.109641	9	14	95722106	CLMN	CLMN (+64136)
	cg14538776	2.98547e-08	0.00124945	-0.249819	-0.219129	0.0688036	5	13	35731414	NBEA	NBEA (+214991)
	cg26413256	2.98617e-08	0.00124974	-0.28521	-0.45501	-0.0336731	6	19	42856838	MEGF8	MEGF8 (+27078)
	cg07965774	2.98802e-08	0.00125051	0.011177	-0.200289	-0.127555	1	1	17746286	RCC2	RCC2 (+19933)
	cg24050745	2.99036e-08	0.0012515	-0.17886	-0.341297	0.0155716	5	6	81348632		BCKDHB (+532269)
	cg08678154	3.0017e-08	0.00125624	0.196913	0.130839	0.0725019	8	17	7036834		ASGR2 (-18707)
	cg05913902	3.00493e-08	0.00125759	-0.0992173	-0.150001	-0.00970175	2	14	96828507	ATG2B	GSKIP (-1386)
	cg06726287	3.00517e-08	0.00125769	-0.149076	-0.214768	-0.063707	6	7	81681115	CACNA2D1	HGF (-281602)
	cg19573516	3.00594e-08	0.00125802	-0.0677649	-0.152187	-0.120848	2	X	73725445	SLC16A2	SLC16A2 (+84150)
	cg14414124	3.00883e-08	0.00125922	-0.203195	-0.054285	-0.0959931	4	2	68465373	PPP3R1	PPP3R1 (+14289)
	cg14037181	3.01191e-08	0.00126052	-0.234299	-0.168261	-0.0489744	6	16	56142913	LOC283856	GNAO1 (-82974)
	cg10535500	3.01326e-08	0.00126108	-0.150435	-0.164038	-0.0116428	6	6	33398610	SYNGAP1	SYNGAP1 (+10670)
	cg01625621	3.01389e-08	0.00126134	-0.0957382	-0.0601627	-0.107469	4	15	34260433	AVEN	CHRM5 (-655)
	cg17188384	3.02148e-08	0.00126452	-0.114187	-0.195444	0.0476478	5	13	97874279	MBNL2	MBNL2 (-329)
	cg00637745	3.02977e-08	0.00126799	-0.0227786	0.163976	0.099893	9	2	121497334		GLI2 (-52650)
	cg03803086	3.03607e-08	0.00127063	-0.361253	-0.177269	-0.0533672	6	21	34185960	C21orf62	C21orf62 (-5933)
	cg02415029	3.04138e-08	0.00127285	-0.0686393	-0.220777	-0.0491119	2	1	110025642	ATXN7L2	CYB561D1 (-11093)
	cg08864962	3.04456e-08	0.00127418	-0.230113	-0.312113	0.0971923	5	22	33974074	LARGE	LARGE (+342334)
	cg25707745	3.04627e-08	0.00127489	-0.109995	-0.323648	-0.112126	3	3	34884326		ARPP21 (-797551)
	cg27207530	3.05086e-08	0.00127682	0.397625	0.167274	-0.048581	8	16	89357600	ANKRD11	ZNF778 (+73483)
	cg19601035	3.05138e-08	0.00127703	0.0737049	0.178137	0.0445283	8	12	48399140	COL2A1	COL2A1 (-872)
	cg21246557	3.05154e-08	0.0012771	-0.0541999	-0.136757	-0.0596883	4	16	58283174	CCDC113	CCDC113 (-665)
	cg11199014	3.05235e-08	0.00127744	0.0273589	0.152112	0.064939	8	19	39798563	LRFN1	LRFN1 (+7412)
	cg17103155	3.05374e-08	0.00127802	-0.213296	-0.0503883	-0.0689313	4	4	4840199		MSX1 (-21193)
	cg05962968	3.05445e-08	0.00127832	-0.00827824	-0.207812	-0.0606847	6	11	44785296	TSPAN18	TSPAN18 (-679)
	cg08216502	3.05551e-08	0.00127876	0.351928	0.149359	-0.0123653	8	12	53298952	KRT8	KRT8 (+21300)
	cg09307794	3.05927e-08	0.00128034	-0.172484	-0.186284	-0.0216358	6	6	53851924		MLIP (-31789)
	cg11872396	3.062e-08	0.00128148	-0.627805	0.0768681	0.068192	7	1	38712798		POU3F1 (-200349)
	cg14099540	3.06238e-08	0.00128164	-0.0229396	-0.209702	-0.0488455	3	9	136018794	RALGDS	GBGT1 (+20537)
	cg27438832	3.06977e-08	0.00128473	-0.0287263	-0.288983	-0.0764438	4	17	77919434	TBC1D16	TBC1D16 (+90212)
	cg19844350	3.07019e-08	0.0012849	-0.173021	-0.0927137	-0.024023	4	10	79373390	KCNMA1	KCNMA1 (+24009)
	cg02678221	3.07266e-08	0.00128594	0.133356	0.17366	0.0702859	8	8	128822094		MYC (+73765)
	cg25272902	3.07325e-08	0.00128619	-0.176601	-0.13441	-0.00579913	4	5	149668535	CAMK2A	CAMK2A (+656)
	cg01688776	3.07393e-08	0.00128647	-0.100326	-0.197626	-0.0380806	6	21	43135973	C21orf129	RIPK4 (+51292)
	cg01057898	3.07855e-08	0.0012884	0.145416	0.282956	0.00472595	8	22	19706868	38596	GP1BB (-3599)
	cg20483374	3.08661e-08	0.00129178	0.1846	0.0955393	0.00130743	8	11	119211646	C1QTNF5	ENSG00000259159 (+5721)
	cg00596048	3.08765e-08	0.00129221	0.103115	0.278663	0.0316742	8	1	41847267		FOXO6 (+19674)
	cg02403419	3.08845e-08	0.00129255	-0.178873	-0.180925	-0.0499722	4	9	130853593	SLC25A25	SLC25A25 (+23114)
	cg11224984	3.09191e-08	0.00129399	-0.0826038	0.335643	0.0968473	9	1	2203045	SKI	SKI (+42912)
	cg21563950	3.0948e-08	0.00129521	-0.00530023	-0.0840001	-0.046967	4	8	19319742	CSGALNACT1	CSGALNACT1 (+140263)
	cg02026070	3.09822e-08	0.00129664	-0.0193409	-0.21636	-0.180231	1	7	156944512	UBE3C	UBE3C (+12906)
	cg02566978	3.10002e-08	0.00129739	-0.024848	-0.156631	0.030331	5	15	75076251	CSK	CSK (+1854)
	cg15505251	3.10075e-08	0.0012977	-0.193527	-0.177991	0.0322434	5	18	43685324	ATP5A1	HAUS1 (+1027)
	cg07962620	3.10504e-08	0.00129949	-0.0146325	-0.137078	-0.17455	4	1	229415135	RAB4A	RAB4A (+8257)
	cg04682936	3.1173e-08	0.00130462	-0.228944	-0.144913	-0.0801461	4	18	21199792	ANKRD29	NPC1 (-32931)
	cg12858274	3.11936e-08	0.00130548	-0.15765	-0.0809127	-0.0495607	4	8	133747448	TMEM71	TMEM71 (+25379)
	cg12303813	3.11966e-08	0.00130561	-0.0114535	0.167753	0.039806	9	1	205283250	NUAK2	NUAK2 (+7632)
	cg00456892	3.12776e-08	0.001309	0.0378014	0.193342	0.000563625	8	11	124629925	ESAM	ESAM (+2254)
	cg04321396	3.13289e-08	0.00131115	-0.0906061	-0.107473	-0.0217513	2	11	65480401	KAT5	KAT5 (+897)
	cg03909863	3.13327e-08	0.00131131	0.0259433	0.425605	0.0165465	8	11	638404	DRD4	DRD4 (+1112)
	cg05639088	3.13685e-08	0.00131281	-0.0960069	-0.330135	-0.123185	4	2	208176244		KLF7 (-145576)
	cg19215876	3.13764e-08	0.00131313	-0.00875427	0.134467	0.0687843	9	13	28545452		CDX2 (-177)
	cg10391828	3.14967e-08	0.00131817	-0.110315	-0.243285	-0.0342048	4	2	202937973	KIAA2012	FZD7 (+38664)
	cg21805136	3.15521e-08	0.00132049	-0.150711	-0.277772	0.026747	5	X	39436529		BCOR (+520126)
	cg05473804	3.16314e-08	0.00132381	0.203373	0.131193	0.116812	8	1	6309300	GPR153	HES3 (+5049)
	cg19969083	3.17252e-08	0.00132773	0.000265714	0.338014	0.0456294	8	13	106753187		EFNB2 (+434274)
	cg18575730	3.17337e-08	0.00132809	0.0453096	0.123909	-0.0350269	8	13	96744289	HS6ST3	HS6ST3 (+1197)
	cg01235518	3.17722e-08	0.0013297	-0.0163798	-0.148951	-0.105147	2	8	81948909	PAG1	PAG1 (+75393)
	cg04006143	3.19354e-08	0.00133653	0.00371792	-0.181573	-0.00754036	3	4	140217312	NDUFC1	NDUFC1 (+5051)
	cg24939194	3.19374e-08	0.00133661	-0.0224276	0.201726	0.107965	9	7	2563611	LFNG	LFNG (+4136)
	cg24786986	3.20506e-08	0.00134135	-0.473288	0.0401531	0.0795899	7	7	114055133	FOXP2	FOXP2 (+82)
	cg08666143	3.20697e-08	0.00134215	-0.0190616	-0.133693	-0.204786	1	20	49952074		NFATC2 (+207183)
	cg10613723	3.2091e-08	0.00134304	0.00494956	0.18155	0.0387321	9	5	10103579		FAM173B (+146418)
	cg05084827	3.21102e-08	0.00134384	-0.102704	-0.346975	-0.0454437	6	2	55402999	C2orf63	CLHC1 (+56449)
	cg24690588	3.21202e-08	0.00134426	0.0486453	0.210698	-0.0107363	8	1	57285399	C1orf168	C1orf168 (-356)
	cg12397357	3.2162e-08	0.00134601	0.365951	0.10646	0.0559146	8	6	167642758		UNC93A (-62044)
	cg03585389	3.21674e-08	0.00134624	-0.245533	-0.288298	-0.0402945	2	10	671628	DIP2C	DIP2C (+63977)
	cg03223351	3.21717e-08	0.00134642	-0.251972	-0.1514	-0.0391105	4	7	156943877	UBE3C	UBE3C (+12271)
	cg21297493	3.22514e-08	0.00134975	0.127224	0.245395	0.0537373	8	1	156357905		RHBG (+18903)
	cg27277537	3.22602e-08	0.00135012	-0.206609	-0.236746	-0.0166757	6	22	42611245	TCF20	TCF20 (+202)
	cg18006568	3.23183e-08	0.00135255	0.0857353	0.184666	-0.00366344	8	2	71205891	ANKRD53	ANKRD53 (+150)
	cg17503123	3.23703e-08	0.00135473	0.0448013	-0.118381	-0.205716	1	3	72012090		PROK2 (-177879)
	cg18594370	3.25032e-08	0.00136029	-0.287042	-0.0746551	-0.093706	4	10	21777758		MLLT10 (-45513)
[truncated: 4,845 more rows]
[truncated: 2 more columns]

## Sheet: Supplementary Table 2
	Supplementary Table 2: Mean differences in DNA methylation between cell stages for each module in the epigenetic trajectory. Shown for each module are the number of probes that make up the module and the mean and stanard deviation (SD) for the methylation difference between the NPC to iPSC, D37 neuron to NPC and D58 neuron to D37 neuron stages for probes in that module.
			NPCs-iPSCs		D37-NPCs		D58-D37
	Module	No. of Probes	Mean	SD	Mean	SD	Mean	SD
	1	737	0.0126616	0.0378271	-0.178965	0.0725018	-0.139554	0.0608838
	2	870	-0.0789748	0.0570817	-0.157092	0.0825231	-0.0960411	0.0590148
	3	429	-0.023548	0.0472242	-0.243235	0.0952453	-0.0330987	0.0489786
	4	853	-0.138554	0.100512	-0.182951	0.095955	-0.11025	0.0582566
	5	735	-0.127808	0.101768	-0.255704	0.0911117	0.0510074	0.0400444
	6	479	-0.204601	0.112565	-0.235172	0.102303	-0.0409207	0.0319355
	7	91	-0.589557	0.0832651	0.0801189	0.0497007	0.0592713	0.04818
	8	1079	0.147426	0.105495	0.168564	0.0716745	0.0309772	0.0456175
	9	529	-0.0196922	0.0503883	0.186065	0.0745042	0.0780342	0.0451486

## Sheet: Supplementary Table 3
	Supplementary Table 3: Results of gene ontology (GO) pathway analysis of the 6,843 loci comprising the epigenetic trajectory signature. for each pathway is the GO ID, pathway descriptor, number of genes annotated to the pathway, the number of genes in our list in the pathway, uncorrected P-value, false discovery rate (FDR)-adjusted P-value and genes in the pathway that were present in our list. P…
	GO Term	GO Descriptor	Ontology	Number genes in pathway	Number genes in our list	Uncorrected P-value	FDR P-value	Genes
	GO:0007399	nervous system development	BP	1401	566	1.87527e-07	0.00117973	FOXO6; CDH4; CDH11; FRY; PLXNC1; FARP1; CDK6; UBE4B; CDKN1C; KATNB1; HMG20B; ADARB1; BASP1; SPON2; SEC24B; BAIAP2; SEMA6C; SEMA4D; SEMA3C; DPYSL4; TACC2; CENPF; IGF2BP1; B3GNT2; NRG3; CPLX2; C7orf16; PPARGC1A; AFG3L2; VAX1; STMN2; CIT; STX1B; CHRM1; POU6F2; CHRNA7; OLFM3; ZFYVE27; NRN1L; SEZ6; CNGB1; CNTFR; SYT2; COL2A1; COL4A1; VSTM2L; TRIM71; ADORA1; UNC5D; CRABP2; CHODL; PRICKLE1; CSK; LRFN5; …
	GO:0048666	neuron development	BP	698	307	2.35579e-06	0.00741014	FOXO6; CDH4; CDH11; FRY; PLXNC1; FARP1; UBE4B; CDKN1C; KATNB1; ADARB1; SPON2; SEC24B; BAIAP2; SEMA6C; SEMA4D; SEMA3C; DPYSL4; B3GNT2; AFG3L2; VAX1; STMN2; STX1B; CHRNA7; OLFM3; ZFYVE27; NRN1L; SEZ6; CNGB1; SYT2; VSTM2L; UNC5D; CRABP2; CHODL; CTNNA1; CTNNA2; CTNND2; CUX1; DAB2IP; CAMSAP1; DAB1; DGKG; DCC; DCLK2; ARX; DLG4; DOK1; DPYSL2; DPYSL3; EFNA5; MEGF8; EGFR; MARK2; CTTN; EPHA3; EPHA4; EPHB1;…
	GO:0048812	neuron projection morphogenesis	BP	437	208	5.2414e-06	0.0109912	CDH4; CDH11; PLXNC1; FARP1; ADARB1; SPON2; BAIAP2; SEMA6C; SEMA4D; SEMA3C; DPYSL4; B3GNT2; AFG3L2; VAX1; CHRNA7; ZFYVE27; NRN1L; SYT2; VSTM2L; UNC5D; CRABP2; CTNNA2; CTNND2; CUX1; DAB2IP; DAB1; DCC; ARX; DLG4; DOK1; DPYSL2; EFNA5; MEGF8; EGFR; MARK2; CTTN; EPHA4; EPHB1; EPHB2; ETV1; EXT1; UNC5B; SEMA3D; FGF13; FGFR2; RUFY3; BTBD3; TRAK1; SHANK2; PALLD; TNIK; HECW1; SARM1; FSTL4; NFASC; PLXND1; NE…
	GO:0061564	axon development	BP	350	167	1.50136e-05	0.0200019	CDH4; CDH11; PLXNC1; ADARB1; SPON2; BAIAP2; SEMA6C; SEMA4D; SEMA3C; B3GNT2; AFG3L2; VAX1; ZFYVE27; VSTM2L; UNC5D; CRABP2; CTNNA1; CTNNA2; DAB1; DCC; ARX; DOK1; DPYSL2; EFNA5; MEGF8; MARK2; CTTN; EPHA3; EPHA4; EPHB1; EPHB2; ETV1; EXT1; UNC5B; SEMA3D; FGF13; FGFR2; RUFY3; TRAK1; PALLD; FSTL4; NFASC; PLXND1; MAPK8IP3; ADNP; MACF1; ABL1; VAX2; SIPA1L1; AUTS2; GFRA1; CYFIP2; GLI2; GLI3; ANK3; GRB2; GR…
	GO:0031175	neuron projection development	BP	615	273	1.68799e-05	0.0200019	FOXO6; CDH4; CDH11; FRY; PLXNC1; FARP1; UBE4B; KATNB1; ADARB1; SPON2; SEC24B; BAIAP2; SEMA6C; SEMA4D; SEMA3C; DPYSL4; B3GNT2; AFG3L2; VAX1; STMN2; STX1B; CHRNA7; ZFYVE27; NRN1L; SEZ6; SYT2; VSTM2L; UNC5D; CRABP2; CHODL; CTNNA1; CTNNA2; CTNND2; CUX1; DAB2IP; CAMSAP1; DAB1; DCC; ARX; DLG4; DOK1; DPYSL2; DPYSL3; EFNA5; MEGF8; EGFR; MARK2; CTTN; EPHA3; EPHA4; EPHB1; EPHB2; ETV1; EXT1; ACSL4; UNC5B; S…
	GO:0048858	cell projection morphogenesis	BP	449	211	1.90767e-05	0.0200019	CDH4; CDH11; PLXNC1; FARP1; WASF2; ADARB1; SPON2; BAIAP2; SEMA6C; SEMA4D; SEMA3C; DPYSL4; B3GNT2; AFG3L2; VAX1; PACSIN2; CHRNA7; ZFYVE27; NRN1L; SYT2; VSTM2L; UNC5D; CRABP2; CTNNA2; CTNND2; CUX1; DAB2IP; DAB1; DCC; ARX; DLG4; DOK1; DPYSL2; EFNA5; MEGF8; EGFR; MARK2; CTTN; EPHA4; EPHB1; EPHB2; ETV1; EXT1; UNC5B; SEMA3D; FGF13; FGFR2; RUFY3; BTBD3; TRAK1; SHANK2; PALLD; TNIK; HECW1; SARM1; FSTL4; N…
	GO:0120039	plasma membrane bounded cell projection morphogenesis	BP	448	210	2.30932e-05	0.0207542	CDH4; CDH11; PLXNC1; FARP1; WASF2; ADARB1; SPON2; BAIAP2; SEMA6C; SEMA4D; SEMA3C; DPYSL4; B3GNT2; AFG3L2; VAX1; CHRNA7; ZFYVE27; NRN1L; SYT2; VSTM2L; UNC5D; CRABP2; CTNNA2; CTNND2; CUX1; DAB2IP; DAB1; DCC; ARX; DLG4; DOK1; DPYSL2; EFNA5; MEGF8; EGFR; MARK2; CTTN; EPHA4; EPHB1; EPHB2; ETV1; EXT1; UNC5B; SEMA3D; FGF13; FGFR2; RUFY3; BTBD3; TRAK1; SHANK2; PALLD; TNIK; HECW1; SARM1; FSTL4; NFASC; PLX…
	GO:0120036	plasma membrane bounded cell projection organization	BP	896	362	2.87923e-05	0.0226415	FOXO6; CDH4; CDH11; CDH13; FRY; PLXNC1; FARP1; WASF2; UBE4B; KATNB1; ADARB1; SPON2; SEC24B; BAIAP2; SEMA6C; SEMA4D; SEMA3C; DPYSL4; B3GNT2; SEPT9; AFG3L2; VAX1; STMN2; STX1B; CHRNA7; HAUS1; EVI5L; ZFYVE27; NRN1L; SEZ6; SYT2; VSTM2L; UNC5D; CRABP2; CHODL; TTBK2; CTNNA1; CTNNA2; CTNND2; FGD5; CUX1; DAB2IP; CAMSAP1; DAB1; DCC; DCTN1; LCA5; ARX; ADAMTS16; DLG4; DNAH5; DOK1; DPYSL2; DPYSL3; EFNA5; MEG…
	GO:0007409	axonogenesis	BP	325	155	4.28545e-05	0.029822	CDH4; CDH11; PLXNC1; ADARB1; SPON2; BAIAP2; SEMA6C; SEMA4D; SEMA3C; B3GNT2; AFG3L2; VAX1; ZFYVE27; VSTM2L; UNC5D; CRABP2; CTNNA2; DAB1; DCC; ARX; DOK1; DPYSL2; EFNA5; MEGF8; MARK2; CTTN; EPHA4; EPHB1; EPHB2; ETV1; EXT1; UNC5B; SEMA3D; FGF13; FGFR2; RUFY3; TRAK1; PALLD; FSTL4; NFASC; PLXND1; ADNP; MACF1; ABL1; VAX2; SIPA1L1; AUTS2; GFRA1; CYFIP2; GLI2; GLI3; ANK3; GRB2; GRB10; GRLF1; SH3KBP1; APBB…
	GO:0097458	neuron part	CC	1047	417	4.99191e-05	0.0298220272873593F13:H13I13	CDH13; FARP1; RASGRP2; KATNB1; CACNG3; BASP1; BAIAP2; IGF2BP1; ADCY2; CPLX2; CPLX1; PPARGC1A; STMN2; CIT; FAM107A; STX1B; CHRM1; CHRM5; ACOT7; CHRNA7; TRIM9; CHRNB3; CHRNE; LMTK3; ADCY9; RAB3C; GRIN3B; ADD1; ZFYVE27; TPH2; NRN1L; SEZ6; CNGB1; SYT2; VSTM2L; COMT; ADORA1; CPE; RIMS4; VTI1A; LRFN5; HRNBP3; CTBP1; CTBP2; CTNNA2; CTNND2; DAB2IP; DAB1; GRASP; DBC1; DCC; DCTN1; DDC; DLG1; DLG2; DLG4; AB…
	GO:0030030	cell projection organization	BP	914	366	5.6171e-05	0.029822	FOXO6; CDH4; CDH11; CDH13; FRY; PLXNC1; FARP1; WASF2; UBE4B; KATNB1; ADARB1; SPON2; SEC24B; BAIAP2; SEMA6C; SEMA4D; SEMA3C; DPYSL4; B3GNT2; SEPT9; AFG3L2; VAX1; STMN2; PACSIN2; STX1B; CHRNA7; HAUS1; EVI5L; ZFYVE27; NRN1L; SEZ6; SYT2; VSTM2L; UNC5D; CRABP2; CHODL; TTBK2; CTNNA1; CTNNA2; CTNND2; FGD5; CUX1; DAB2IP; CAMSAP1; DAB1; DCC; DCTN1; LCA5; ARX; ADAMTS16; DLG4; DNAH5; DNAH9; DOK1; DPYSL2; DP…
	GO:0048667	cell morphogenesis involved in neuron differentiation	BP	404	187	5.91087e-05	0.029822	CDH4; CDH11; PLXNC1; FARP1; ADARB1; SPON2; SEC24B; BAIAP2; SEMA6C; SEMA4D; SEMA3C; B3GNT2; AFG3L2; VAX1; CHRNA7; ZFYVE27; VSTM2L; UNC5D; CRABP2; CTNNA2; CTNND2; CUX1; DAB1; DCC; ARX; DLG4; DOK1; DPYSL2; EFNA5; MEGF8; MARK2; CTTN; EPHA4; EPHB1; EPHB2; ETV1; EXT1; UNC5B; SEMA3D; FGF13; FGFR2; RUFY3; BTBD3; TRAK1; SHANK2; PALLD; TNIK; HECW1; SARM1; FSTL4; NFASC; PLXND1; NEDD4L; ADNP; MACF1; ABL1; NG…
	GO:0032990	cell part morphogenesis	BP	458	212	6.16256e-05	0.029822	CDH4; CDH11; PLXNC1; FARP1; WASF2; ADARB1; SPON2; BAIAP2; SEMA6C; SEMA4D; SEMA3C; DPYSL4; B3GNT2; AFG3L2; VAX1; PACSIN2; CHRNA7; ZFYVE27; NRN1L; SYT2; VSTM2L; UNC5D; CRABP2; CTNNA2; CTNND2; CUX1; DAB2IP; DAB1; DCC; ARX; DLG4; DOK1; DPYSL2; EFNA5; MEGF8; EGFR; MARK2; CTTN; EPHA4; EPHB1; EPHB2; ETV1; EXT1; UNC5B; SEMA3D; FGF13; FGFR2; RUFY3; BTBD3; TRAK1; SHANK2; PALLD; TNIK; HECW1; SARM1; FSTL4; N…
	GO:0016049	cell growth	BP	281	128	7.40132e-05	0.0332584	CDH4; MUC12; RASGRP2; CDKN1A; MAD2L2; SEMA6C; SEMA4D; SEMA3C; NRG3; FAM107A; AKAP13; ZFYVE27; NRN1L; SYT2; CRABP2; DACT3; CYP27B1; DCC; DPYSL2; AGTR1; EFNA5; MEGF8; EGFR; CTTN; EXTL3; SEMA3D; FGF13; CLSTN1; RUFY3; FSTL4; NEDD4L; ADNP; MACF1; SH3BP4; FLRT1; ABL1; AUTS2; KIF26A; GATA4; GJA1; CYFIP2; TMEM97; APBB1; APBB2; PRMT2; IGFBPL1; IGFBP2; IGFBP5; APP; C1orf187; L1CAM; SMAD3; MAP1B; NGF; NKX6-…
	GO:0030182	neuron differentiation	BP	829	346	8.72336e-05	0.0365858	FOXO6; CDH4; CDH11; FRY; PLXNC1; FARP1; UBE4B; CDKN1C; KATNB1; HMG20B; ADARB1; SPON2; SEC24B; BAIAP2; SEMA6C; SEMA4D; SEMA3C; DPYSL4; B3GNT2; AFG3L2; VAX1; STMN2; STX1B; CHRNA7; OLFM3; ZFYVE27; NRN1L; SEZ6; CNGB1; SYT2; VSTM2L; UNC5D; CRABP2; CHODL; CTNNA1; CTNNA2; CTNND2; CUX1; DAB2IP; CAMSAP1; DAB1; DGKG; DBC1; DCC; DCLK2; ARX; DLG4; DNMT3A; DNMT3B; DOK1; DPYSL2; DPYSL3; DTX1; EFNA5; MEGF8; EGF…
	GO:0006928	movement of cell or subcellular component	BP	1145	436	9.63175e-05	0.0378708	CDH4; PTPRU; GPC6; CDH13; PLXNC1; WASF2; CDK6; EFS; APC2; KATNB1; ADARB1; SPON2; SEMA6C; SEMA4D; SEMA3C; DPYSL4; CENPE; B3GNT2; NRG3; SIX2; PPARGC1A; MAPRE2; VAX1; FAM107A; NISCH; TNRC4; COL1A2; VSTM2L; COL5A1; LRRC15; ADORA1; UNC5D; WDR66; TTBK2; CTNNA1; CTNNA2; GLIPR2; DAB2IP; DAB1; DACH1; DCC; LCA5; ARX; DLG1; DLG2; DNAH5; DNAH9; DOCK1; DOK1; DPYSL2; DPYSL3; DSP; AGTR1; EFNA5; MEGF8; EGFR; DNA…
	GO:0010975	regulation of neuron projection development	BP	316	150	0.000118128	0.0437145	FOXO6; CDH4; PLXNC1; KATNB1; BAIAP2; SEMA6C; SEMA4D; SEMA3C; STMN2; STX1B; ZFYVE27; SEZ6; SYT2; CRABP2; CHODL; CUX1; DAB2IP; DAB1; DCC; DLG4; DPYSL2; DPYSL3; EFNA5; MEGF8; MARK2; CTTN; EPHA3; EPHA4; EPHB2; SDK1; SEMA3D; FES; FGF13; CPEB3; RUFY3; TRAK1; SHANK2; TNIK; HECW1; SARM1; FSTL4; RAP1GAP2; PLXND1; NEDD4L; ADNP; NCS1; GRIP1; MACF1; ABL1; NGEF; SIPA1L1; SS18L1; DNM3; RAPGEF1; GRLF1; PACSIN1;…
	GO:0060074	synapse maturation	BP	17	15	0.000128031	0.044747	SEZ6; DAB2IP; CLSTN1; SEZ6L; NFATC4; PALM; SHANK1; PFN1; GOLSYN; PTEN; YWHAZ; CAMK2B; IGSF21; NEURL; NRXN1

## Sheet: Supplementary Table 4
	Supplementary Table 4: Enrichment analysis of genomic features annotated to the probes comprising the epigenetic trajectory. A two sided Fisher's exact test was used to determine whether Bonferroni significants CpG sites (N = 6,843), as well as progressively hypomethylated (N = 4,954) and hypermethylated (N = 1,889) loci, were enriched in particular genomic regions and features based on illumina …
		All significant CpG sites (N = 6,843)		Significantly hypomethylated probes(N = 4,954)		Significantly hypermethylated probes(N = 1,889)
		OR(95% CI)	P-value	OR(95% CI)	P-value	OR(95% CI)	P-value
	TSS1500	0.925389	0.104282	0.726761	2.33352e-08	1.48431	1.39159e-07
	TSS200	1.06295	0.341147	0.715477	4.80484e-05	1.99207	1.22164e-12
	5'UTR	1.05791	0.228856	1.07038	0.204215	1.01324	0.866484
	1stExon	1.00652	0.95973	0.902245	0.41862	1.2646	0.149629
	Body	1.06626	0.0175624	1.20443	1.37992e-09	0.772039	1.37365e-07
	3'UTR	1.20264	0.0477919	0.893975	0.348162	1.93219	2.84606e-06
	Island	1.00665	0.889157	0.260473	6.7445e-76	3.81575	3.0775e-103
	Shelf	1.17	0.0050853	1.17578	0.010898	1.10894	0.30336
	Shore	1.21736	1.6744e-08	0.744425	9.65164e-12	2.73402	6.23133e-78

## Sheet: Supplementary Table 5
	Supplementary Table 5. The topological properties of the subnetwork of 60 genes constituting the strongly connected component (SCC) in the gene-gene interaction network. Shown for each gene are the following properties: betweenness centrality and closeness centrality (most influential genes based on their shortest paths to other genes in the network), clustering coefficient (a measure of gene ten…
	Gene name	Betweenness Centrality	Closeness Centrality	Clustering Coefficient	Edge Count	In-degree	Neighborhood Connectivity	Out-degree
	STAT3	0.53117	0.513043	0.0452899	27	7	5.41667	20
	ETS1	0.242749	0.345029	0.0757576	14	5	5.91667	9
	CD44	0.208244	0.36875	0.0777778	11	8	7.5	3
	EGFR	0.179611	0.265766	0.0909091	14	8	7.45455	6
	SMAD3	0.168398	0.31383	0.0757576	14	7	6.91667	7
	GRB2	0.151183	0.29064	0.0476191	9	6	3.85714	3
	GAB2	0.131947	0.353293	0	4	2	12.3333	2
	STAT5B	0.131756	0.322404	0.133333	8	4	5.83333	4
	PAX3	0.106122	0.275701	0.1	11	9	7.7	2
	SALL4	0.0867051	0.347059	0.15	5	1	11.2	4
	PML	0.0841115	0.380645	0.0666667	8	3	7.66667	5
	PTEN	0.0777994	0.253219	0.0636364	12	9	6.90909	3
	FGFR2	0.0774262	0.345029	0	3	2	11.3333	1
	MEIS1	0.0756979	0.327778	0.0535714	10	3	4.75	7
	PAX6	0.0728507	0.237903	0.166667	9	7	9	2
	NEDD4	0.0651259	0.220149	0.15	5	3	6.8	2
	PBX1	0.0627762	0.398649	0.3	8	2	10.3333	6
	MEIS2	0.0570705	0.307292	0.333333	5	2	7.66667	3
	NR2F1	0.0497479	0.317204	0.0952381	7	2	6.85714	5
	DNMT3B	0.0418974	0.312169	0.107143	8	2	7.625	6
	TBX2	0.0369131	0.295	0	4	2	9	2
	ISG15	0.0342636	0.18323	0	3	2	5	1
	IRF7	0.0264623	0.157333	0.0833333	4	3	10.5	1
	WWOX	0.025693	0.36646	0.1	5	2	10.4	3
	PTBP1	0.0248636	0.273148	0	3	2	5.33333	1
	PAX7	0.0201271	0.218519	0.2	6	5	10.8333	1
	SALL3	0.0192383	0.263393	0	3	1	6	2
	SHC2	0.0184833	0.226923	0.333333	3	2	7	1
	TYK2	0.0175336	0.251064	0.166667	4	2	3.66667	2
	CHD7	0.0172414	0.197987	0	2	1	4.5	1
	RBPMS	0.0172414	0.242798	0	2	1	7	1
	HIPK2	0.0172414	0.207746	0	2	1	5.5	1
	SKI	0.0172414	0.257642	0.15	5	1	6.2	4
	TIAM1	0.0169491	0.173021	0	2	1	6	1
	PARD3	0.0169491	0.205575	0	2	1	6.5	1
	SHC3	0.0169491	0.226923	0.333333	3	2	6.66667	1
	RGS4	0.0169491	0.205575	0	2	1	13.5	1
	AGTR1	0.0169491	0.25431	0.166667	3	1	3.66667	2
	PTAFR	0.0163647	0.201365	0	3	2	13.5	1
	GRB10	0.0157197	0.210714	0.333333	3	1	9	2
	DNMT3A	0.00919355	0.312169	0	5	1	5.6	4
	MEG3	0.00910773	0.216912	0.166667	3	2	11.6667	1
	MALAT1	0.00798753	0.273148	0.166667	3	1	13	2
	USP7	0.00720826	0.283654	0.333333	3	1	11	2
	FGF1	0.00715956	0.259912	0	3	2	6	1
	RUNX3	0.00685644	0.262222	0.333333	5	3	10	2
	RFX1	0.00549143	0.278302	0.333333	3	1	12.3333	2
	NFIC	0.00462205	0.187898	0.166667	3	2	6.66667	1
	BASP1	0.00453053	0.262222	0	2	1	10	1
	DISC1	0.00222823	0.228682	0	2	1	7.5	1
	ALK	0.00216735	0.187898	0	2	1	7.5	1
	MADD	0.00216507	0.228682	0	2	1	9.5	1
	ERBB4	0.00208699	0.210714	0.166667	4	3	9.33333	1
	SMAD7	0.00204741	0.239837	0.166667	5	4	12.25	1
	FKBP5	0.00188602	0.138173	0	3	2	4.66667	1
	JARID2	0.00146113	0.240816	0.166667	3	1	9.66667	2
	SIX3	0.00087668	0.19281	0	3	2	6	1
	SOX6	0	0.271889	1	2	1	17	1
	PVT1	0	0.34104	0	2	1	24	1
	PBX3	0	0.247899	0	2	1	8	1

## Sheet: Supplementary Table 6
	Supplementary Table 6: Changes in gene expression and corresponding methylation changes in our top most connected genes. Using the LIBD stem cell browser (Burke et al, 2020) overall gene expression changes for our most connected genes were assesed over neuronal differentiation. Shown are the 53 (of 60) genes that had overall significant gene expression changes, with their direction of overall exp…
	Gene name	Overall Expression Change	Overall Expression Change Q-value	Methylation Change
	STAT3	↑	6.277e-14	↓
	ETS1	↓	1.46e-05	↓
	CD44	↓	8.937e-05	↓
	EGFR	↓	3.419e-10	↓
	SMAD3	↓	2.65e-33	↓
	GRB2	↑	1.142e-26	↓
	GAB2	↑	0.047	↓
	STAT5B	↓	1.152e-19	↓
	PAX3	↑	5.247e-05	↑
	SALL4	↓	4.503e-74	↑
	PML	↓	6.613e-19	↓
	PTEN	↑	2.828e-46	↓
	FGFR2	↓	9.682e-33	↑
	MEIS1	↑	0.0011	↑
	PAX6	↑	0.0285	↑
	NEDD4	↑	1.986e-09	↓
	PBX1	↑	4.243e-20	↓
	MEIS2	↑	0.0002213	↑
	DNMT3B	↓	9.279e-21	↑
	ISG15	↓	1.427e-23	↑
	IRF7	↓	1.07e-27	↑
	WWOX	↓	3.158e-23	↓
	PTBP1	↓	3.025e-53	↓
	PAX7	↑	1.178e-15	↑
	SALL3	↓	1.564e-29	↑
	SHC2	↑	8.383e-05	↓
	TYK2	↑	1.647e-11	↑
	CHD7	↓	1.748e-39	↑
	RBPMS	↓	3.66e-13	↑
	HIPK2	↑	1.862e-06	↓
	SKI	↓	1.18e-11	↑
	TIAM1	↓	2.797e-21	↑
	PARD3	↓	3.031e-26	↓
	SHC3	↑	2.027e-35	↓
	RGS4	↑	3.989e-24	↑
	PTAFR	↓	0.00179	↓
	GRB10	↓	1.151e-07	↑
	DNMT3A	↓	0.000254	↓
	MEG3	↑	2.768e-06	↑
	MALAT1	↑	0.0486	↓
	FGF1	↑	8.491e-09	↓
	RFX1	↓	0.00462	↑
	NFIC	↑	9.577e-14	↑
	BASP1	↑	1.759e-26	↓
	DISC1	↑	2.973e-13	↓
	ALK	↑	1.322e-31	↓
	MADD	↑	9.641e-37	↓
	ERBB4	↑	3.24e-18	↓
	SMAD7	↑	2.175e-30	↓
	FKBP5	↓	1.348e-47	↑
	SOX6	↑	2.923e-05	↑
	PVT1	↓	8.198e-15	↑
	PBX3	↑	3.277e-14	↓
